# Supplementary material for: Synthesis of isoquinolin-1,4-diones via photocatalytic C(sp 2 )–C(sp 3 )-scission/oxidation of 4-(hydroxy(aryl)methyl)-isoquinolin-1(2 H )-ones
Source: Royal Society of Chemistry journal article supplement (doi:10.1039/d5cc03799a), 2026-01-01

# Synthesis of isoquinoline-1,4-diones via photocatalytic C(sp<sup>2</sup>)-C(sp<sup>3</sup>)-scission/oxidation of 4-(hydroxy(aryl)methyl)-isoquinoline-1(2H)-ones

Taotao Zhao,<sup>a†</sup> Qianyi Liang,<sup>a†</sup> Keying Gu,<sup>a</sup> Jiangbin Huang,<sup>a</sup> Zhuang Xiong,<sup>a</sup> Jinhui Hu,<sup>a</sup> and Jia-Qiang Wu<sup>a\*</sup>

*School of Pharmacy and Food Engineering, Wuyi University, Jiangmen 529020, China*

† These authors contributed equally to this work.

## Supporting Information

### Table of Contents

|                                                                                                |    |
|------------------------------------------------------------------------------------------------|----|
| 1. General Considerations .....                                                                | 2  |
| 2. Preparation of N-(pivaloyloxy)benzamide.....                                                | 3  |
| 3. Preparation of 1-(4-methoxyphenyl)-3-phenylprop-2-yn-1-ol.....                              | 3  |
| 4. Preparation of 4-(hydroxymethyl)-isoquinolin-1(2H)-ones.....                                | 4  |
| 5. Optimization of the reaction conditions .....                                               | 4  |
| 6. General Procedure .....                                                                     | 5  |
| 7. Characterization of Products .....                                                          | 6  |
| 7. Synthetic Transformation of 2 to 37-45 .....                                                | 19 |
| 8. Gram Scale Reaction.....                                                                    | 23 |
| 9. Derivatization of 2.....                                                                    | 23 |
| 10. Mechanistic Studies.....                                                                   | 26 |
| 11. References .....                                                                           | 33 |
| 12. <sup>1</sup> H NMR 、 <sup>19</sup> F NMR and <sup>13</sup> C NMR spectra of Products ..... | 34 |

## 1. General Considerations

Unless otherwise noted, all reactions were carried out under an atmosphere of nitrogen in dried glassware. If reaction was not carried out at room temperature, reaction temperatures are reported as the temperature of the bath surrounding the vessel unless otherwise stated. The dry solvents used were purified by distillation over the drying agents indicated in parentheses and were transferred under argon: THF (Na-benzophenone), 1,2-dichloroethane (CaH<sub>2</sub>), dichloromethane (CaH<sub>2</sub>). Anhydrous DMF and MeOH were purchased from Acros Organics and stored under argon. Commercially available chemicals were obtained from Acros Organics, Aldrich Chemical Co., Strem Chemicals, Alfa Aesar, ABCR and TCI Europe and used as received unless otherwise stated.

Analytical thin layer chromatography was performed on Polygram SIL G/UV<sub>254</sub> plates. Visualization was accomplished with short wave UV light, or KMnO<sub>4</sub> staining solutions followed by heating. Flash chromatography was performed on silica gel (200-300 mesh) by standard technique. The visible-light mediated reactions were performed on Wp-TEC-1020SL instruments which are purchased from WATTCAS, China.

<sup>1</sup>H were recorded on a Bruker AV 600 in solvents as indicated. Chemical shifts ( $\delta$ ) are given in ppm relative to TMS. The residual solvent signals were used as references and the chemical shifts converted to the TMS scale (CDCl<sub>3</sub>:  $\delta_{\text{H}}$  = 7.26 ppm,  $\delta_{\text{C}}$  = 77.16 ppm; d<sub>6</sub>-DMSO:  $\delta_{\text{H}}$  = 2.50 ppm,  $\delta_{\text{C}}$  = 39.52 ppm; d<sub>4</sub>-MeOD:  $\delta_{\text{H}}$  = 3.31 ppm,  $\delta_{\text{C}}$  = 49.00 ppm). The following abbreviations were used to describe peak splitting patterns when appropriate: s = singlet, d = doublet, t = triplet, q = quartet, m = multiplet, dd = doublet of doublet. Coupling constants, *J*, were reported in hertz unit (Hz). <sup>13</sup>C NMR spectra were recorded on 151 MHz spectrometers. Chemical shifts were reported in parts per million relative to tetramethylsilane ( $\delta$  = 0). High-resolution mass spectra (HRMS) were produced by Thermo Fisher Scientific spectrometer with EI and ESI mode unless otherwise stated.

No attempts were made to optimize yields for substrate synthesis.

## 2. Preparation of N-(pivaloyloxy)benzamide

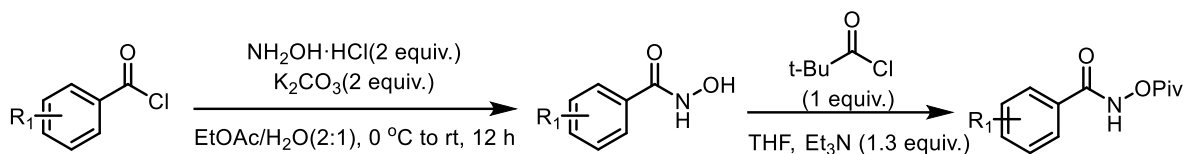

A 250 mL round-bottom flask was charged with  $K_2CO_3$  (2.76 g, 20.0 mmol, 2.0 equiv.) and hydroxylammonium chloride (1.39 g, 20.0 mmol, 2.0 equiv.) in a mixture of EtOAc (40 mL) and water (20 mL). The reaction was cooled to 0 °C (ice bath), benzoyl chloride (1.16 mL, 1.41 g, 10.0 mmol, 1.0 equiv.) was added, and the solution was stirred at 25 °C for 12 h. Then, the organic phase was separated, and the aqueous phase was extracted with EtOAc (3 x 30 mL). The combined organic layers were washed with brine, dried over anhydrous  $MgSO_4$ , filtered, and concentrated under vacuo. The crude hydroxamic acid was dissolved in dry THF (40 mL) and  $Et_3N$  (1.81 mL, 1.32 g, 13.0 mmol, 1.3 equiv.) under argon atmosphere followed by dropwise addition of trimethylacetyl chloride (1.23 mL, 1.21 g, 10.0 mmol, 1.0 equiv.). After stirring at 25 °C for 12 h, the reaction mixture was extracted with water (30 mL) and EtOAc (3 x 20 mL). The organic layer was separated and dried over anhydrous  $MgSO_4$ , filtered and concentrated in *vacuo*. The crude was purified by flash column chromatography ( $SiO_2$ , cyclohexane/EtOAc 100:0 to 70:30, v/v).

These compounds were prepared according to a known procedure and the characterization data matches those reported in the literature<sup>1</sup>.

## 3. Preparation of 1-(4-methoxyphenyl)-3-phenylprop-2-yn-1-ol

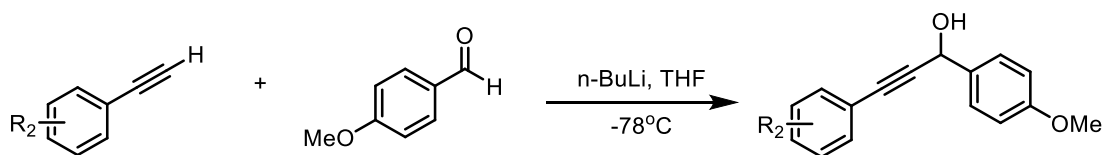

To a solution of alkyne (3.9 mmol) in anhydrous THF (5 mL) at -78 °C under  $N_2$  atmosphere was added n-BuLi (1.6 M solution in hexanes, 2.06 mL, 3.3 mmol). The reaction was stirred at this temperature for 20 min then at room temperature for 1 h. After cooling to -78 °C, aldehyde (3 mmol) was added to the mixture and was allowed to warm up to room temperature gradually and stirred for an additional hour before quenched with aqueous  $NH_4Cl$ . The mixture was extracted with EtOAc (30 x 2 mL), and the combined organic phases were washed with water and brine, dried with anhydrous  $MgSO_4$ , and filtered. The filtrate was concentrated under reduced pressure and the

residue was purified by flash chromatography on silica gel (hexanes/ethyl acetate, v/v, 15:1) to produce the desired product.

The title compounds were prepared according to a known procedure and the characterization data matches those reported in the literature<sup>2</sup>.

#### 4. Preparation of 4-(hydroxymethyl)-isoquinolin-1(2H)-ones

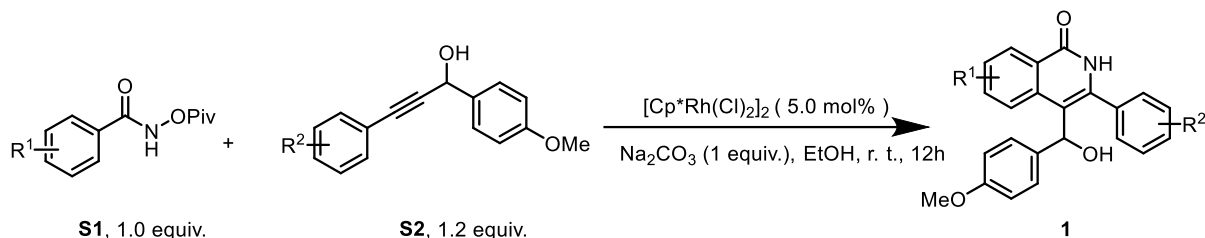

In an 8 mL reaction tube, the mixture of **S1** (0.25 mmol), **S2** (0.3 mmol),  $[\text{Cp}^*\text{RhCl}_2]_2$  (5.0 mol%) and  $\text{Na}_2\text{CO}_3$  (1.0 equiv.) was added EtOH (2 mL). Then the resulting mixture was stirred for 16 h. When the reaction was finished, the desired product precipitated out as a solid, and the product was simply collected by filtration. For some cases, if the precipitation did not occur, the reaction mixture was subjected directly to flash chromatography on silica gel (petroleum ether/ethyl acetate) to provide the desired products **1a**.

The title compounds were prepared according to a known procedure and the characterization data matches those reported in the literature<sup>3</sup>.

#### 5. Optimization of the reaction conditions

It was pleased to find that the reaction proceeded smoothly in the presence of 1.5 equivalent of CsOAc at room temperature in MeOH under oxygen atmosphere, afforded the desired product **2** in the yield of 78%, along with 80% yield of 4-methoxybenzaldehyde (entry 1). The structure of compound **2** was unambiguously determined by X-ray crystallographic analysis (CDCC 2423943). In the absence of base or the use of PivOH as an additive, lowering the yield of **2** (entries 2 and 3). Switching the base to other commonly used inorganic bases (entries 4-7), or 1,2,6-collidine (entry 8) which was commonly used in the PCET procedure, showed that  $\text{NaHCO}_3$  was the optimum (entry 6). Control experiments showed that Ir(III), irradiation and oxygen were essential as their absence led to no formation of the desired product (entries 9-11).



| Entry           | R               | Additive                        | Solvent | Yield |
|-----------------|-----------------|---------------------------------|---------|-------|
| 1               | OMe             | CsOAc                           | MeOH    | 78%   |
| 2               | OMe             | -                               | MeOH    | 69%   |
| 3               | OMe             | PivOH                           | MeOH    | 16%   |
| 4               | OMe             | NaOAc                           | MeOH    | 78%   |
| 5               | OMe             | Na <sub>2</sub> CO <sub>3</sub> | MeOH    | 76%   |
| 6               | OMe             | NaHCO <sub>3</sub>              | MeOH    | 81%   |
| 7               | OMe             | CsOPiv                          | MeOH    | 73%   |
| 8               | OMe             | 1,2,6-collidine                 | MeOH    | 69%   |
| 9 <sup>b</sup>  | OMe             | NaHCO <sub>3</sub>              | MeOH    | trace |
| 10 <sup>c</sup> | OMe             | NaHCO <sub>3</sub>              | MeOH    | trace |
| 11 <sup>d</sup> | OMe             | NaHCO <sub>3</sub>              | MeOH    | trace |
| 12              | H               | NaHCO <sub>3</sub>              | MeOH    | 72%   |
| 13              | <i>t</i> Bu     | NaHCO <sub>3</sub>              | MeOH    | 75%   |
| 14              | CF <sub>3</sub> | NaHCO <sub>3</sub>              | MeOH    | 48%   |
| 15 <sup>e</sup> | OMe             | Na <sub>2</sub> CO <sub>3</sub> | MeOH    | 12%   |
| 16 <sup>f</sup> | OMe             | Na <sub>2</sub> CO <sub>3</sub> | MeOH    | 35%   |
| 17 <sup>g</sup> | OMe             | Na <sub>2</sub> CO <sub>3</sub> | MeOH    | trace |

Next, we evaluated the influence of the substitution on the Ar ring at C4 position of **1** (entries 12-14, Table 1). It was observed that both electron-rich and electron-deficient substituents were well tolerated. Notably, the electron-rich substituents such as methoxy (OMe) resulted in significantly higher yields of product **2** (entry 6), with the yield order being OMe > tert-butyl (tBu) > hydrogen (H) > trifluoromethyl (CF<sub>3</sub>). This phenomenon may be attributed to the increased electron density provided by the OMe substituent, which facilitates the  $\beta$ -scission process leading to the formation of 4-methoxybenzaldehyde.

## 6. General Procedure

## S5

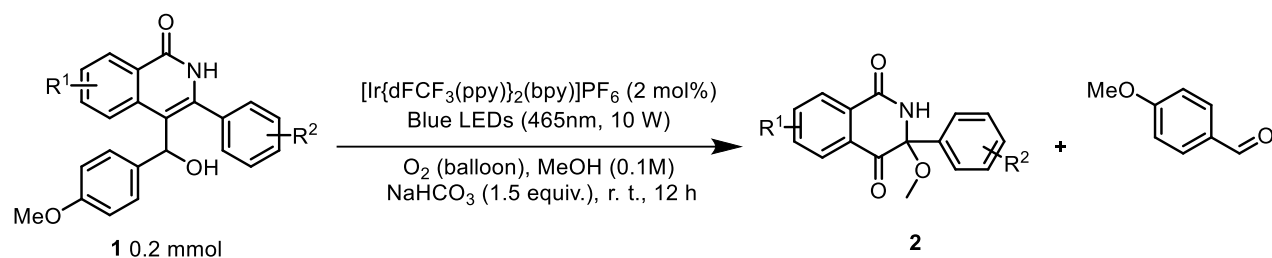

A 15 mL-Quartz capsule tube charged with a stirring bar, was added 4-(hydroxy(phenyl)methyl)-3-phenylisoquinolin-1(2H)-one **1** (0.2 mmol, 1 equiv.),  $[\text{Ir}\{\text{dFCF}_3\text{ppy}\}_2(\text{bpy})]\text{PF}_6$  (4.0 mg, 0.004 mmol, 2.0 mol%),  $\text{NaHCO}_3$  (25.2 mg, 0.3 mmol, 1.5 equiv.), and dry MeOH (2.0 mL) were added subsequently into the reaction vessel. The reaction was allowed to stir at 25 °C for 12 hours. The reaction mixture was then diluted with EtOAc (20 mL) and washed with brine. The aqueous phase was extracted with EtOAc again. The organic layers were combined, washed with brine and dried over  $\text{Na}_2\text{SO}_4$ . The pure product was purified by flash column chromatography on silica with an appropriate solvent to afford the pure product.

## 7. Characterization of Products

### 3-methoxy-3-phenyl-2,3-dihydroisoquinoline-1,4-dione (**2**)

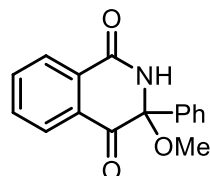

The title compound was prepared *via* the general procedure, after purification by silica gel column chromatography (PE/EA = 4/1), **2** was obtained as a white solid (443.3 mg, 0.162 mmol, 81 %).  $R_f = 0.4$  (PE/EA = 4/1).

**$^1\text{H}$  NMR (600 MHz, DMSO)**  $\delta$  9.55 (s, 1H), 8.22 – 8.20 (m, 1H), 7.98 – 7.95 (m, 1H), 7.91 (dd,  $J = 7.8, 1.3$  Hz, 1H), 7.82 (td,  $J = 7.6, 1.3$  Hz, 1H), 7.48 – 7.46 (m, 2H), 7.40 – 7.36 (m, 3H), 3.31 (s, 3H).

**$^{13}\text{C}$  NMR (151 MHz, DMSO)**  $\delta$  191.1, 162.9, 138.6, 136.3, 134.0, 131.7, 129.5, 128.9, 128.5, 127.0, 126.9, 90.7, 51.9.

ESI-MS: calculated for  $\text{C}_{16}\text{H}_{14}\text{NO}_3$   $[\text{M}+\text{H}]^+$ : 268.0968, found: 268.0968.

### 3-methoxy-6-methyl-3-phenyl-2,3-dihydroisoquinoline-1,4-dione (3)

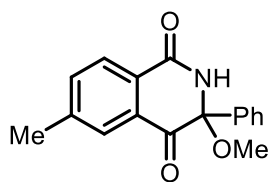

The title compound was prepared *via* the general procedure, after purification by silica gel column chromatograph (PE/EA = 4/1), **3** was obtained as a white solid (35.4 mg, 0.126 mmol, 63 %).  $R_f$  = 0.4 (PE/EA = 4/1).

**$^1\text{H}$  NMR (600 MHz, DMSO)**  $\delta$  9.47 (s, 1H), 8.02 (s, 1H), 7.81 (d,  $J$  = 7.9 Hz, 1H), 7.63 (d,  $J$  = 7.9 Hz, 1H), 7.46 (d,  $J$  = 7.9, 1.8 Hz, 2H), 7.37 (m,  $J$  = 6.9 Hz, 3H), 3.29 (s, 3H), 2.51 (s, 3H).

**$^{13}\text{C}$  NMR (151 MHz, DMSO)**  $\delta$  190.7, 163.0, 147.5, 138.9, 134.7, 131.6, 129.4, 128.8, 128.7, 128.4, 127.1, 126.9, 90.7, 51.8, 22.0.

ESI-MS: calculated for  $\text{C}_{17}\text{H}_{16}\text{NO}_3$   $[\text{M}+\text{H}]^+$ : 282.1124, found: 282.1124.

### 6-ethyl-3-methoxy-3-phenyl-2,3-dihydroisoquinoline-1,4-dione (4)

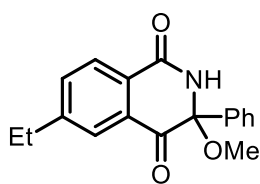

The title compound was prepared *via* the general procedure, after purification by silica gel column chromatograph (PE/EA = 4/1), **4** was obtained as a white solid (50.1 mg, 0.17 mmol, 85 %).  $R_f$  = 0.40 (PE/EA = 4/1).

**$^1\text{H}$  NMR (600 MHz, DMSO)**  $\delta$  9.45 (s, 1H), 8.12 (d,  $J$  = 8.0 Hz, 1H), 7.81 (dd,  $J$  = 8.1, 1.8 Hz, 1H), 7.73 (d,  $J$  = 1.8 Hz, 1H), 7.48 – 7.45 (dd, 2H), 7.40 – 7.35 (m, 3H), 2.74 (q,  $J$  = 7.6 Hz, 2H), 1.19 (t,  $J$  = 7.6 Hz, 3H).

**$^{13}\text{C}$  NMR (151 MHz, DMSO)**  $\delta$  191.3, 163.0, 150.5, 138.7, 135.9, 130.7, 129.5, 129.4, 128.9, 128.7, 127.0, 125.7, 90.8, 51.9, 28.4, 15.4.

ESI-MS: calculated for  $\text{C}_{18}\text{H}_{18}\text{NO}_3$   $[\text{M}+\text{H}]^+$ : 296.1281, found: 296.1281.

### 6-(chloromethyl)-3-methoxy-3-phenyl-2,3-dihydroisoquinoline-1,4-dione (5)

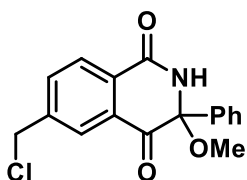

The title compound was prepared *via* the general procedure after purification by silica gel column chromatography (PE/EA = 4/1), **5** was obtained as a white solid (25.8 mg, 0.082 mmol, 41%).  $R_f$  = 0.30 (PE/EA = 4/1).

**$^1\text{H}$  NMR (600 MHz, DMSO)**  $\delta$  9.52 (s, 1H), 8.19 (d,  $J$  = 8.0 Hz, 1H), 7.90 – 7.87 (m, 1H), 7.82 (d,  $J$  = 1.7 Hz, 1H), 7.48 – 7.44 (m, 2H), 7.41 – 7.35 (m, 3H), 4.55 (s, 2H), 3.31 (s, 3H).

**<sup>13</sup>C NMR (151 MHz, DMSO)** δ 191.1, 162.9, 145.0, 138.6, 134.5, 130.7, 130.6, 129.5, 128.9, 128.7, 127.0, 124.9, 90.8, 72.8, 58.5, 51.9.

**<sup>1</sup>H NMR (400 MHz, Chloroform-d)** δ 8.34 (d, *J* = 8.0 Hz, 1H), 8.01 (d, *J* = 1.7 Hz, 1H), 7.87 (dd, *J* = 8.0, 1.8 Hz, 1H), 7.59 – 7.55 (m, 2H), 7.38 – 7.35 (m, 3H), 6.60 (s, 1H), 4.64 (s, 2H), 3.45 (s, 3H).

**<sup>13</sup>C NMR (101 MHz, Chloroform-d)** δ 189.7, 162.9, 143.5, 137.7, 135.4, 131.2, 130.7, 129.8, 129.6, 129.0, 127.1, 126.5, 91.3, 52.3, 44.7.

ESI-MS: calculated for C<sub>17</sub>H<sub>15</sub>ClNO<sub>3</sub> [M+H]<sup>+</sup> : 316.0734, found: 316.0732

### 6-(tert-butyl)-3-methoxy-3-phenyl-2,3-dihydroisoquinoline-1,4-dione (6)

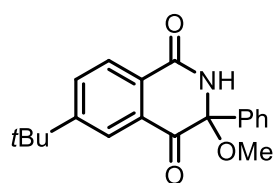

The title compound was prepared *via* the general procedure, after purification by silica gel column chromatograph (PE/EA = 4/1), **6** was obtained as a white solid (48.4 mg, 0.15 mmol, 75 %). *R*<sub>f</sub> = 0.5 (PE/EA = 4/1).

**<sup>1</sup>H NMR (600 MHz, DMSO)** δ 9.46 (s, 1H), 8.15 (d, *J* = 8.2 Hz, 1H), 8.04 (dd, *J* = 8.2 Hz, 1H), 7.86 (d, *J* = 2.1 Hz, 1H), 7.49 – 7.46 (m, 2H), 7.37 (m, *J* = 9.4, 7.1 Hz, 3H), 3.30 (s, 3H), 1.31 (s, 9H).

**<sup>13</sup>C NMR (151 MHz, DMSO)** δ 191.3, 157.1, 138.8, 133.7, 130.4, 129.4, 129.4, 128.9, 128.6, 127.0, 122.8, 90.9, 51.9, 35.5, 31.0.

ESI-MS: calculated for C<sub>20</sub>H<sub>22</sub>NO<sub>3</sub> [M+H]<sup>+</sup>: 324.1594, found: 324.1594.

### 6-fluoro-3-methoxy-3-phenyl-2,3-dihydroisoquinoline-1,4-dione (7)

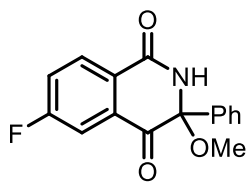

The title compound was prepared *via* the general procedure, after purification by silica gel column chromatograph (PE/EA = 4/1), **7** was obtained as a white solid (37.6 mg, 0.132 mmol, 66 %). *R*<sub>f</sub> = 0.4 (PE/EA = 4/1).

**<sup>1</sup>H NMR (600 MHz, DMSO)** δ 9.60 (s, 1H), 8.27 (dd, *J* = 8.7, 5.3 Hz, 1H), 7.80 (td, *J* = 8.6, 2.7 Hz, 1H), 7.65 (dd, *J* = 8.4, 2.7 Hz, 1H), 7.47 (dd, *J* = 8.0, 1.7 Hz, 2H), 7.41 – 7.37 (m, 3H), 3.31 (s, 3H).

**<sup>13</sup>C NMR (151 MHz, DMSO)** δ 190.2, 166.0, 164.4, 162.2, 138.2, 133.1, 133.0, 132.1, 132.1, 129.6, 128.9, 128.4, 127.1, 123.6, 123.4, 113.2, 113.1, 91.0, 52.0.

**<sup>19</sup>F NMR (377 MHz, DMSO)**  $\delta$  -104.43.

ESI-MS: calculated for C<sub>16</sub>H<sub>13</sub>FNO<sub>3</sub> [M+H]<sup>+</sup>: 286.0873, found: 286.0873.

### 6-chloro-3-methoxy-3-phenyl-2,3-dihydroisoquinoline-1,4-dione (8)

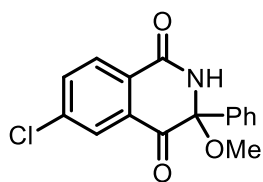

The title compound was prepared *via* the general procedure, after purification by silica gel column chromatograph (PE/EA = 4/1), **8** was obtained as a white solid (38.9 mg, 0.13 mmol, 65 %).  $R_f$  = 0.5 (PE/EA = 4/1).

**<sup>1</sup>H NMR (400 MHz, CDCl<sub>3</sub>)**  $\delta$  8.27 (d,  $J$  = 8.4 Hz, 1H), 7.95 (d,  $J$  = 2.1 Hz, 1H), 7.77 (dd,  $J$  = 8.4, 2.1 Hz, 1H), 7.58 – 7.53 (m, 2H), 7.38 – 7.35 (m, 3H), 6.83 (s, 1H), 3.44 (s, 3H).

**<sup>13</sup>C NMR (101 MHz, CDCl<sub>3</sub>)**  $\delta$  189.1, 162.8, 140.5, 137.4, 135.5, 132.1, 130.6, 129.8, 129.1, 129.0, 127.2, 126.6, 91.4, 52.3.

ESI-MS: calculated for C<sub>16</sub>H<sub>13</sub>ClNO<sub>3</sub> [M+H]<sup>+</sup>: 302.0578, found: 301.0574.

### 6-bromo-3-methoxy-3-phenyl-2,3-dihydroisoquinoline-1,4-dione (9)

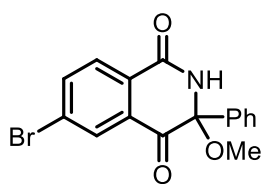

The title compound was prepared *via* the general procedure, after purification by silica gel column chromatograph (PE/EA = 8/1), **9** was obtained as a white solid (47.5 mg, 0.14 mmol, 69 %).  $R_f$  = 0.2 (PE/EA = 8/1).

**<sup>1</sup>H NMR (400 MHz, CDCl<sub>3</sub>)**  $\delta$  8.19 (d,  $J$  = 8.4 Hz, 1H), 8.11 (d,  $J$  = 2.0 Hz, 1H), 7.94 (dd,  $J$  = 8.4, 2.0 Hz, 1H), 7.57 – 7.53 (m, 2H), 7.38 – 7.35 (m, 3H), 6.76 (s, 1H), 3.44 (s, 3H).

**<sup>13</sup>C NMR (101 MHz, CDCl<sub>3</sub>)**  $\delta$  189.0, 162.9, 138.5, 137.4, 132.0, 130.6, 130.2, 129.9, 129.5, 129.0, 128.9, 126.5, 91.4, 52.3.

ESI-MS: calculated for C<sub>16</sub>H<sub>13</sub>BrNO<sub>3</sub> [M+H]<sup>+</sup>: 346.0073, found: 346.0076.

### 6-iodo-3-methoxy-3-phenyl-2,3-dihydroisoquinoline-1,4-dione (10)

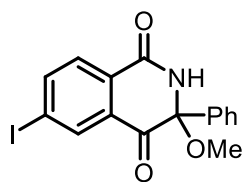

The title compound was prepared *via* the general procedure, after purification by silica gel column chromatograph (PE/EA = 4/1), **10** was obtained as a white solid (57.3 mg, 0.146 mmol, 73 %).  $R_f$  = 0.40 (PE/EA = 4/1).

**<sup>1</sup>H NMR (600 MHz, DMSO)**  $\delta$  9.62 (s, 1H), 8.33 (d,  $J$  = 8.2 Hz, 1H), 8.16 (s, 0H), 7.93 (d,  $J$  = 8.2 Hz, 1H), 7.48 – 7.43 (m, 2H), 7.39 (d,  $J$  = 7.2 Hz, 3H), 3.30 (s, 3H).

**<sup>13</sup>C NMR (151 MHz, DMSO)** δ 190.1, 162.6, 144.8, 138.2, 135.0, 131.6, 130.9, 130.3, 129.6, 128.9, 127.0, 102.0, 90.8, 52.0.

ESI-MS: calculated for C<sub>16</sub>H<sub>13</sub>INO<sub>3</sub> [M+H]<sup>+</sup>: 393.9934, found: 393.9934.

**methyl 3-methoxy-1,4-dioxo-3-phenyl-1,2,3,4-tetrahydroisoquinoline-6-carboxylate (11)**

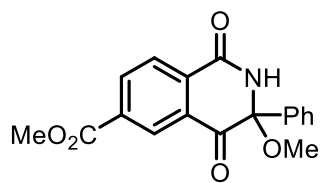

The title compound was prepared *via* the general procedure, after purification by silica gel column chromatography (PE/EA = 4/1), **11** was obtained as a colourless oil (50.7 mg, 0.156 mmol, 78 %). R<sub>f</sub> = 0.4 (PE/EA = 4/1).

**<sup>1</sup>H NMR (600 MHz, DMSO)** δ 9.77 (s, 1H), 8.45 (dd, *J* = 8.0, 1.8 Hz, 1H), 8.35 – 8.32 (m, 2H), 7.48 (dd, *J* = 7.9, 1.9 Hz, 2H), 7.42 – 7.38 (m, 3H), 3.91 (s, 3H), 3.32 (s, 3H).

**<sup>13</sup>C NMR (151 MHz, DMSO)** δ 190.4, 165.1, 162.1, 138.1, 136.0, 134.9, 134.4, 130.9, 129.6, 129.5, 128.9, 127.4, 127.1, 90.8, 53.3, 52.0.

ESI-MS: calculated for C<sub>18</sub>H<sub>16</sub>NO<sub>5</sub> [M+H]<sup>+</sup>: 326.1022, found: 326.1022.

**3-methoxy-3-phenyl-6-(trifluoromethyl)-2,3-dihydroisoquinoline-1,4-dione (12)**

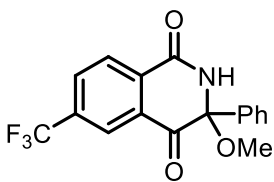

The title compound was prepared *via* the general procedure, after purification by silica gel column chromatography (PE/EA = 4/1), **12** was obtained as a colourless oil (29.5 mg, 0.088 mmol, 44 %). R<sub>f</sub> = 0.50 (PE/EA = 4/1).

**<sup>1</sup>H NMR (600 MHz, DMSO)** δ 9.83 (s, 1H), 8.41 (d, *J* = 8.2 Hz, 1H), 8.33 (dd, *J* = 8.2, 2.2 Hz, 1H), 8.15 (s, 1H), 7.50 – 7.47 (m, 2H), 7.42 – 7.38 (m, 3H), 3.33 (s, 3H).

**<sup>19</sup>F NMR (377 MHz, DMSO)** δ -61.87.

**<sup>13</sup>C NMR (151 MHz, DMSO)** δ 190.0, 161.8, 137.9, 134.9, 133.6, 132.5, 132.5, 131.3, 130.1, 129.7, 129.0, 127.1, 124.5, 123.7, 123.7, 122.7, 90.8, 52.1.

ESI-MS: calculated for C<sub>17</sub>H<sub>13</sub>F<sub>3</sub>NO<sub>3</sub> [M+H]<sup>+</sup>: 336.0842, found: 336.0842.

**3-methoxy-3-phenyl-6-(trifluoromethoxy)-2,3-dihydroisoquinoline-1,4-dione (13)**

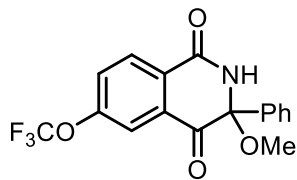

The title compound was prepared *via* the general procedure, after purification by silica gel column chromatography (PE/EA = 4/1), **13** was obtained as a white solid (51.2 mg, 0.146 mmol, 73 %).  $R_f$  = 0.50 (PE/EA = 4/1).

**$^1\text{H}$  NMR (600 MHz, DMSO)**  $\delta$  9.71 (s, 1H), 8.34 (d,  $J$  = 8.6 Hz, 1H), 7.95 (ddd,  $J$  = 8.6, 2.6, 1.1 Hz, 1H), 7.76 (dd,  $J$  = 2.4, 1.3 Hz, 1H), 7.48 (dd,  $J$  = 7.9, 1.8 Hz, 2H), 7.42 – 7.38 (m, 3H), 3.32 (s, 3H).

**$^{19}\text{F}$  NMR (377 MHz, DMSO)**  $\delta$  -56.77.

**$^{13}\text{C}$  NMR (151 MHz, DMSO)**  $\delta$  190.0, 161.9, 152.0, 138.0, 132.6, 131.8, 130.5, 129.6, 128.9, 128.2, 127.1, 122.9, 121.1, 119.4, 118.0, 90.9. .

ESI-MS: calculated for  $\text{C}_{17}\text{H}_{13}\text{F}_3\text{NO}_4$   $[\text{M}+\text{H}]^+$  : 352.0791, found: 352.0791.

### 3-methoxy-1,4-dioxo-3-phenyl-1,2,3,4-tetrahydroisoquinoline-6-carbonitrile (14)

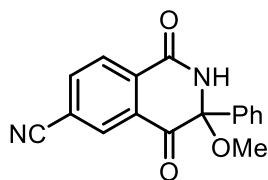

The title compound was prepared *via* the general procedure, after purification by silica gel column chromatography (PE/EA = 2/1), **14** was obtained as a colourless oil (19.3 mg, 0.066 mmol, 33 %).  $R_f$  = 0.50 (PE/EA = 2/1).

**$^1\text{H}$  NMR (600 MHz, DMSO)**  $\delta$  9.87 (s, 1H), 8.39 (dd,  $J$  = 8.1, 1.7 Hz, 1H), 8.35 (dd,  $J$  = 1.7, 0.6 Hz, 1H), 8.33 (dd,  $J$  = 8.1, 0.6 Hz, 1H), 7.48 – 7.46 (m, 2H), 7.42 – 7.38 (m, 3H), 3.31 (s, 3H).

**$^{13}\text{C}$  NMR (151 MHz, DMSO)**  $\delta$  189.6, 161.7, 139.1, 137.7, 134.7, 131.2, 131.1, 129.7, 129.5, 129.0, 127.1, 117.7, 116.6, 90.7, 52.1.

ESI-MS: calculated for  $\text{C}_{17}\text{H}_{13}\text{N}_2\text{O}_3$   $[\text{M}+\text{H}]^+$  : 293.0920, found: 293.0920.

### 3-methoxy-6-nitro-3-phenyl-2,3-dihydroisoquinoline-1,4-dione (15)

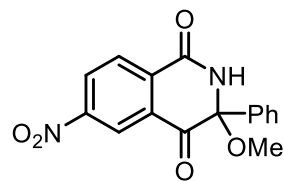

The title compound was prepared *via* the general procedure, after purification by silica gel column chromatography (PE/EA = 2/1), **15** was obtained as a colourless oil (9.9 mg, 0.032 mmol, 16 %).  $R_f$  = 0.5 (PE/EA = 2/1).

**$^1\text{H}$  NMR (400 MHz, Chloroform- $d$ )**  $\delta$  8.80 (d,  $J$  = 2.2 Hz, 1H), 8.63 (dd,  $J$  = 8.5, 2.3 Hz, 1H), 8.54 (d,  $J$  = 8.5 Hz, 1H), 7.57 – 7.54 (m, 2H), 7.41 – 7.38 (m, 3H), 3.47 (s, 3H).

**<sup>13</sup>C NMR (151 MHz, Chloroform-d)** δ 188.0, 161.6, 136.6, 135.1, 132.2, 130.9, 130.2, 129.2, 129.2, 126.6, 122.7, 91.5, 52.5, 29.9.

ESI-MS: calculated for C<sub>16</sub>H<sub>13</sub>N<sub>2</sub>O<sub>5</sub> [M+H]<sup>+</sup>: 313.0818, found: 313.0818.

### 3-methoxy-5,7-dimethyl-3-phenyl-2,3-dihydroisoquinoline-1,4-dione (16)

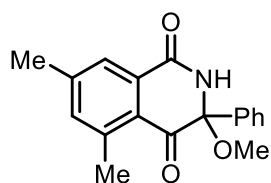

The title compound was prepared *via* the general procedure after purification by silica gel column chromatograph (PE/EA = 4/1), **16** was obtained as a colourless oil (30.7mg, 0.104 mmol, 52%). R<sub>f</sub> = 0.50 (PE/EA = 4/1).

**<sup>1</sup>H NMR (600 MHz, DMSO)** δ 9.51 (s, 1H), 7.91 (d, *J* = 2.0 Hz, 1H), 7.44 – 7.42 (m, 3H), 7.39 – 7.35 (m, 3H), 3.28 (s, 3H), 2.46 (s, 3H), 2.44 (s, 3H).

**<sup>13</sup>C NMR (151 MHz, DMSO)** δ 191.5, 163.3, 145.7, 140.9, 138.7, 137.5, 132.8, 129.3, 128.8, 127.2, 127.0, 126.5, 90.7, 51.7, 21.8, 21.7.

ESI-MS: calculated for C<sub>18</sub>H<sub>18</sub>NO<sub>3</sub> [M+H]<sup>+</sup>: 296.1281, found: 296.1281.

### 5,7-difluoro-3-methoxy-3-phenyl-2,3-dihydroisoquinoline-1,4-dione (17)

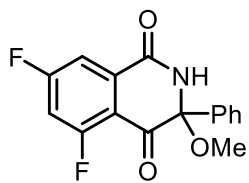

The title compound was prepared *via* the general procedure, after purification by silica gel column chromatograph (PE/EA = 4/1), **17** was obtained as a white solid (38.1 mg, 0.126 mmol, 63 %). R<sub>f</sub> = 0.40 (PE/EA = 4/1).

**<sup>1</sup>H NMR (600 MHz, DMSO)** δ 9.86 (s, 1H), 7.83 – 7.73 (m, 2H), 7.47 – 7.44 (m, 2H), 7.41 (m, *J* = 8.6, 3.8 Hz, 3H), 3.32 (s, 3H).

**<sup>13</sup>C NMR (151 MHz, DMSO)** δ 186.8, 167.3, 167.2, 165.6, 165.5, 162.9, 162.8, 161.2, 161.1, 137.7, 135.9, 135.9, 129.6, 128.9, 127.1, 112.2, 112.2, 112.1, 112.0, 110.8, 110.6, 110.5, 90.8, 52.0.

**<sup>19</sup>F NMR (471 MHz, DMSO)** δ -95.94 (d, *J* = 15.3 Hz), -106.85, -106.88.

ESI-MS: calculated for C<sub>16</sub>H<sub>12</sub>F<sub>2</sub>NO<sub>3</sub> [M+H]<sup>+</sup>: 304.0779, found: 304.0779.

### 3-methoxy-3-phenyl-2,3-dihydrobenzo[*g*]isoquinoline-1,4-dione (18)



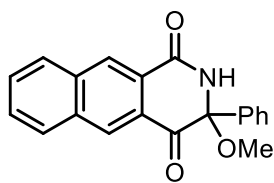

The title compound was prepared *via* the general procedure, after purification by silica gel column chromatography (PE/EA = 4/1), **18** was obtained as a yellow solid (38.0 mg, 0.120 mmol, 60 %).  $R_f$  = 0.40 (PE/EA = 4/1).

**$^1\text{H}$  NMR (400 MHz, Chloroform- $d$ )**  $\delta$  9.21 (d,  $J$  = 8.4 Hz, 1H), 8.42 (d,  $J$  = 8.6 Hz, 1H), 8.27 (d,  $J$  = 8.6 Hz, 1H), 7.95 – 7.92 (m, 1H), 7.69 – 7.62 (m, 4H), 7.38 – 7.34 (m,  $J$  = 5.0, 3H), 6.61 (s, 1H), 3.51 (s, 3H).

**$^{13}\text{C}$  NMR (151 MHz, Chloroform- $d$ )**  $\delta$  191.5, 163.7, 136.5, 136.2, 131.9, 130.3, 129.9, 129.6, 129.0, 129.0, 128.9, 127.4, 127.3, 126.6, 123.9, 91.3, 52.2, 29.9.

ESI-MS: calculated for  $\text{C}_{20}\text{H}_{16}\text{NO}_3$   $[\text{M}+\text{H}]^+$ : 318.1124, found: 318.1121

### 3-methoxy-3-(p-tolyl)-2,3-dihydroisoquinoline-1,4-dione (**20**)

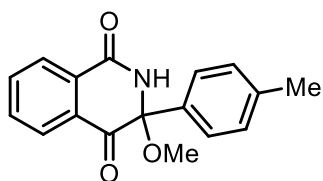

The title compound was prepared *via* the general procedure, after purification by silica gel column chromatography (PE/EA = 4/1), **20** was obtained as a colourless oil (49.4 mg, 0.176 mmol, 88 %).  $R_f$  = 0.4 (PE/EA = 4/1).

**$^1\text{H}$  NMR (600 MHz, DMSO)**  $\delta$  9.51 (s, 1H), 8.19 (d,  $J$  = 7.8 Hz, 1H), 7.95 (dd,  $J$  = 8.3, 6.9 Hz, 1H), 7.89 (d,  $J$  = 7.7 Hz, 1H), 7.81 (t,  $J$  = 7.5 Hz, 1H), 7.34 (d,  $J$  = 8.0 Hz, 2H), 7.18 (d,  $J$  = 8.0 Hz, 2H), 3.29 (s, 3H), 2.27 (s, 3H)..

**$^{13}\text{C}$  NMR (151 MHz, DMSO)**  $\delta$  191.1, 163.0, 139.0, 136.2, 135.6, 134.0, 131.7, 130.7, 129.4, 128.4, 126.9, 126.9, 90.8, 51.9, 21.1.

ESI-MS: calculated for  $\text{C}_{17}\text{H}_{16}\text{NO}_3$   $[\text{M}+\text{H}]^+$ : 282.1124, found: 282.1124.

### 3-(4-ethylphenyl)-3-methoxy-2,3-dihydroisoquinoline-1,4-dione (**21**)

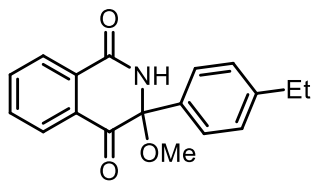

The title compound was prepared *via* the general procedure, after purification by silica gel column chromatography (PE/EA = 4/1), **21** was obtained as a white solid (44.8 mg, 0.152 mmol, 76 %).  $R_f$  = 0.30 (PE/EA = 4/1).

**$^1\text{H}$  NMR (600 MHz, DMSO)**  $\delta$  9.51 (s, 1H), 8.20 (dd,  $J$  = 7.8, 1.3 Hz, 1H), 7.96 (td,  $J$  = 7.6, 1.3 Hz, 1H), 7.90 (d,  $J$  = 7.3 Hz, 0H), 7.82 (td,  $J$  = 7.5, 1.3 Hz, 1H), 7.38 – 7.35 (m, 2H), 7.23 – 7.20 (m, 2H), 3.30 (s, 3H), 2.58 (q,  $J$  = 7.6 Hz, 2H), 1.14 (t,  $J$  = 7.6 Hz, 3H).

**<sup>13</sup>C NMR (151 MHz, DMSO)** δ 191.1, 162.9, 145.2, 136.2, 135.9, 134.0, 131.7, 130.7, 128.5, 128.3, 127.0, 126.9, 90.8, 51.9, 28.2, 15.9.

ESI-MS: calculated for C<sub>18</sub>H<sub>18</sub>NO<sub>3</sub> [M+H]<sup>+</sup>: 296.1281, found: 296.1281.

### 3-(4-(tert-butyl)phenyl)-3-methoxy-2,3-dihydroisoquinoline-1,4-dione (**22**)

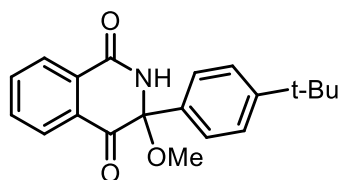

The title compound was prepared *via* the general procedure after purification by silica gel column chromatography (PE/EA = 4/1), **22** was obtained as a white solid (49.8mg, 0.154 mmol, 77 %). R<sub>f</sub> = 0.40 (PE/EA = 4/1).

**<sup>1</sup>H NMR (600 MHz, DMSO)** δ 9.49 (s, 1H), 8.20 (d, *J* = 7.8 Hz, 1H), 7.97 – 7.95 (m, 1H), 7.91 (d, *J* = 7.7 Hz, 1H), 7.82 (dd, *J* = 8.4, 6.8 Hz, 1H), 7.38 (td, *J* = 8.4, 1.7 Hz, 4H), 3.30 (s, 3H), 1.25 (s, 9H).

**<sup>13</sup>C NMR (151 MHz, DMSO)** δ 191.1, 162.9, 152.0, 136.2, 135.6, 134.0, 131.7, 130.7, 128.5, 126.9, 126.7, 125.7, 90.7, 51.9, 34.8, 31.5.

ESI-MS: calculated for C<sub>20</sub>H<sub>22</sub>NO<sub>3</sub> [M+H]<sup>+</sup>: 324.1594, found: 324.1594.

### 3-([1,1'-biphenyl]-4-yl)-3-methoxy-2,3-dihydroisoquinoline-1,4-dione (**23**)

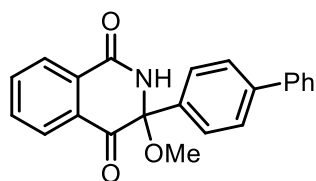

The title compound was prepared *via* the general procedure after purification by silica gel column chromatography (PE/EA = 4/1), **23** was obtained as a colourless oil (40.5 mg, 0.118 mmol, 59 %). R<sub>f</sub> = 0.50 (PE/EA = 4/1).

**<sup>1</sup>H NMR (600 MHz, DMSO)** δ 9.60 (s, 1H), 8.23 (dd, *J* = 7.9, 1.2 Hz, 1H), 7.99 – 7.97 (m, 1H), 7.94 (dd, *J* = 7.8, 1.3 Hz, 1H), 7.85 – 7.82 (m, 1H), 7.71 – 7.67 (m, 2H), 7.66 – 7.63 (m, 2H), 7.57 – 7.53 (m, 2H), 7.47 (t, *J* = 7.7 Hz, 2H), 7.38 (t, *J* = 7.4 Hz, 1H), 3.31 (s, 3H).

**<sup>13</sup>C NMR (151 MHz, DMSO)** δ 191.0, 162.9, 141.3, 139.8, 137.6, 136.3, 134.1, 131.7, 130.7, 129.5, 128.5, 128.3, 127.7, 127.2, 127.2, 126.9, 90.6, 51.9.

ESI-MS: calculated for C<sub>22</sub>H<sub>18</sub>NO<sub>3</sub> [M+H]<sup>+</sup>: 344.1281, found: 344.1280.

### 3-(4-fluorophenyl)-3-methoxy-2,3-dihydroisoquinoline-1,4-dione (**24**)

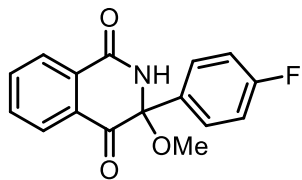

The title compound was prepared *via* the general procedure, after purification by silica gel column chromatography (PE/EA = 4/1), **24** was obtained as a colourless oil (30.2 mg, 0.106 mmol, 53 %).  $R_f = 0.40$  (PE/EA = 4/1).

**$^1\text{H}$  NMR (600 MHz, DMSO)**  $\delta$  9.59 (s, 1H), 8.21 (dd,  $J = 7.8, 1.2$  Hz, 1H), 7.98 – 7.96 (m, 1H), 7.92 (dd,  $J = 7.8, 1.3$  Hz, 1H), 7.85 – 7.82 (m, 1H), 7.53 – 7.49 (m, 2H), 7.22 (t,  $J = 8.9$  Hz, 2H), 3.29 (s, 3H).

**$^{13}\text{C}$  NMR (151 MHz, DMSO)**  $\delta$  190.8, 163.7, 162.9, 162.1, 136.3, 134.1, 131.6, 130.5, 129.5, 129.4, 128.5, 126.9, 115.8, 115.6, 90.2, 51.8.

**$^{19}\text{F}$  NMR (377 MHz, DMSO)**  $\delta$  -113.18.

ESI-MS: calculated for  $\text{C}_{16}\text{H}_{13}\text{FNO}_3$   $[\text{M}+\text{H}]^+$ : 286.0873, found: 286.0873.

### 3-(4-chlorophenyl)-3-methoxy-2,3-dihydroisoquinoline-1,4-dione (**25**)

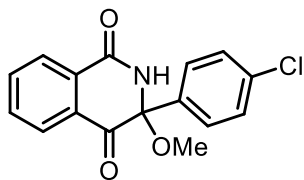

The title compound was prepared *via* the general procedure, after purification by silica gel column chromatography (PE/EA = 4/1), **25** was obtained as a white solid (36.7 mg, 0.122 mmol, 61 %).  $R_f = 0.40$  (PE/EA = 4/1).

**$^1\text{H}$  NMR (600 MHz, DMSO)**  $\delta$  9.61 (s, 1H), 8.21 (dd,  $J = 7.9, 1.2$  Hz, 1H), 7.97 (td,  $J = 7.6, 1.4$  Hz, 1H), 7.92 (dd,  $J = 7.8, 1.3$  Hz, 1H), 7.85 – 7.82 (m, 1H), 7.50 – 7.48 (m, 2H), 7.47 – 7.45 (m, 2H), 3.29 (s, 3H).

**$^{13}\text{C}$  NMR (151 MHz, DMSO)**  $\delta$  190.6, 162.9, 137.4, 136.4, 134.3, 134.1, 131.6, 130.5, 129.1, 128.8, 128.5, 126.9, 90.1, 51.8.

ESI-MS: calculated for  $\text{C}_{16}\text{H}_{13}\text{ClNO}_3$   $[\text{M}+\text{H}]^+$ : 302.0578, found: 302.0578.

### 3-(4-bromophenyl)-3-methoxy-2,3-dihydroisoquinoline-1,4-dione (**26**)

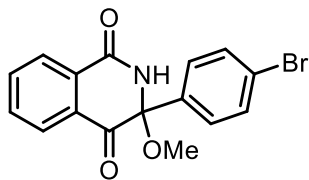

The title compound was prepared *via* the general procedure, after purification by silica gel column chromatography (PE/EA = 4/1), **26** was obtained as a white solid (49.8 mg, 0.144 mmol, 72 %).  $R_f = 0.40$  (PE/EA = 4/1).

**$^1\text{H}$  NMR (400 MHz, Chloroform- $d$ )**  $\delta$  8.35 – 8.29 (m, 1H), 8.01 (dd,  $J = 7.7, 1.0$  Hz, 1H), 7.87 – 7.83 (m, 1H), 7.75 – 7.71 (m, 1H), 7.50 – 7.43 (m, 4H), 6.98 (s, 1H), 3.42 (s, 3H).

**<sup>13</sup>C NMR (101 MHz, Chloroform-d)** δ 189.7, 163.4, 137.0, 135.7, 133.8, 132.0, 130.7, 128.9, 128.4, 127.4, 124.2, 90.6, 52.2.

ESI-MS: calculated for C<sub>16</sub>H<sub>13</sub>BrNO<sub>3</sub> [M+H]<sup>+</sup> : 346.0073, found: 346.0073.

**methyl 4-(3-methoxy-1,4-dioxo-1,2,3,4-tetrahydroisoquinolin-3-yl)benzoate (27)**

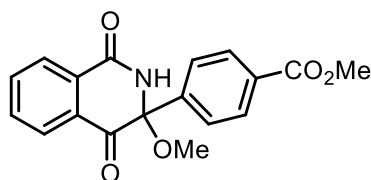

The title compound was prepared *via* the general procedure, after purification by silica gel column chromatography (PE/EA = 4/1), **27** was obtained as a white solid (45.5 mg, 0.140 mmol, 70 %). R<sub>f</sub> = 0.4 (PE/EA = 4/1).

**<sup>1</sup>H NMR (600 MHz, DMSO)** δ 9.66 (s, 1H), 8.23 (d, *J* = 7.8 Hz, 1H), 8.00 – 7.97 (m, 3H), 7.93 (d, *J* = 7.7 Hz, 1H), 7.84 (td, *J* = 7.4, 1.3 Hz, 1H), 7.64 (d, *J* = 8.2 Hz, 2H), 3.85 (s, 3H), 3.31 (s, 3H).

**<sup>13</sup>C NMR (151 MHz, DMSO)** δ 190.6, 166.3, 162.8, 143.5, 136.5, 134.1, 131.6, 130.6, 130.5, 129.7, 128.6, 127.6, 126.9, 90.3, 52.7, 51.9.

ESI-MS: calculated for C<sub>18</sub>H<sub>16</sub>NO<sub>5</sub> [M+H]<sup>+</sup> : 326.1022, found: 326.1021.

**4-(3-methoxy-1,4-dioxo-1,2,3,4-tetrahydroisoquinolin-3-yl)benzonitrile (28)**

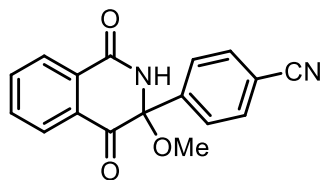

The title compound was prepared *via* the general procedure, after purification by silica gel column chromatography (PE/EA = 2/1), **28** was obtained as a white solid (17.5 mg, 0.06 mmol, 30 %). R<sub>f</sub> = 0.40 (PE/EA = 2/1).

**<sup>1</sup>H NMR (600 MHz, DMSO)** δ 9.69 (s, 1H), 8.22 (dd, *J* = 7.7, 1.2 Hz, 1H), 8.01 – 7.98 (m, 1H), 7.93 (dd, *J* = 7.8, 1.3 Hz, 1H), 7.90 – 7.87 (m, 2H), 7.85 – 7.83 (m, 1H), 7.69 – 7.67 (m, 2H), 3.29 (s, 3H).

**<sup>13</sup>C NMR (151 MHz, DMSO)** δ 190.3, 162.8, 143.5, 136.5, 134.2, 132.8, 131.6, 130.4, 128.6, 128.3, 127.0, 118.9, 112.3, 89.9, 51.9.

ESI-MS: calculated for C<sub>17</sub>H<sub>13</sub>N<sub>2</sub>O<sub>3</sub> [M+H]<sup>+</sup> : 293.0920, found: 293.0920.

**3-methoxy-3-(4-(trifluoromethyl)phenyl)-2,3-dihydroisoquinoline-1,4-dione (29)**

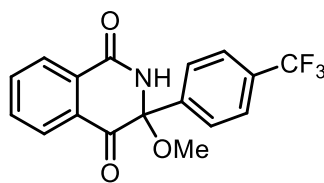

The title compound was prepared *via* the general procedure, after purification by silica gel column chromatography (PE/EA = 4/1), **29** was obtained as a white solid (28.8 mg, 0.086 mmol, 43 %).  $R_f$  = 0.30 (PE/EA = 4/1).

**$^1\text{H}$  NMR (600 MHz, Chloroform- $d$ )**  $\delta$  8.34 (d,  $J$  = 7.8 Hz, 1H), 8.02 (d,  $J$  = 7.7 Hz, 1H), 7.86 (t,  $J$  = 7.3 Hz, 1H), 7.74 (dd,  $J$  = 11.4, 8.0 Hz, 3H), 7.62 (d,  $J$  = 8.4 Hz, 2H), 6.90 (s, 1H), 3.45 (s, 3H).

**$^{13}\text{C}$  NMR (151 MHz, Chloroform- $d$ )**  $\delta$  189.6, 163.3, 141.9, 135.9, 133.9, 131.8(q, C-F,  $2J_{\text{C-F}}$  = 52.65), 130.8, 130.7, 129.0, 127.4, 127.2, 125.8(q, C-F,  $3J_{\text{C-F}}$  = 3.79), 123.9(q, C-F,  $1J_{\text{C-F}}$  = 273.61), 90.6, 52.3.

**$^{19}\text{F}$  NMR (377 MHz, DMSO)**  $\delta$  -61.15.

ESI-MS: calculated for  $\text{C}_{17}\text{H}_{13}\text{F}_3\text{NO}_3$   $[\text{M}+\text{H}]^+$  : 336.0842, found: 336.0842.

### 3-methoxy-3-(4-(trifluoromethoxy)phenyl)-2,3-dihydroisoquinoline-1,4-dione (**30**)

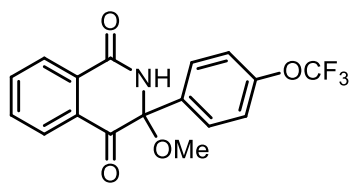

The title compound was prepared *via* the general procedure, after purification by silica gel column chromatography (PE/EA = 4/1), **30** was obtained as a white solid (42.8 mg, 0.122 mmol, 61 %).  $R_f$  = 0.50 (PE/EA = 4/1).

**$^1\text{H}$  NMR (600 MHz, DMSO)**  $\delta$  9.62 (s, 1H), 8.24 – 8.20 (m, 1H), 7.98 (td,  $J$  = 7.6, 1.4 Hz, 1H), 7.93 (dd,  $J$  = 7.8, 1.4 Hz, 1H), 7.85 (dd,  $J$  = 7.5, 1.3 Hz, 1H), 7.62 – 7.60 (m, 2H), 7.40 (d,  $J$  = 8.4 Hz, 2H), 3.29 (s, 3H).

**$^{13}\text{C}$  NMR (151 MHz, DMSO)**  $\delta$  190.6, 162.8, 149.2, 137.7, 136.4, 134.1, 131.6, 130.5, 129.4, 128.6, 127.0, 121.3, 121.3, 119.6, 90.0, 51.8.

**$^{19}\text{F}$  NMR (377 MHz, DMSO)**  $\delta$  -56.78.

ESI-MS: calculated for  $\text{C}_{17}\text{H}_{13}\text{F}_3\text{NO}_4$   $[\text{M}+\text{H}]^+$ : 352.0791, found: 352.0791.

### 3-methoxy-3-(4-pentanoylphenyl)-2,3-dihydroisoquinoline-1,4-dione (**31**)

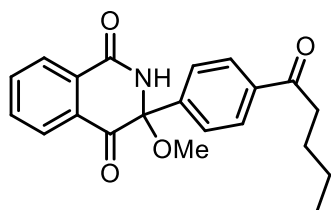

The title compound was prepared *via* the general procedure, after purification by silica gel column chromatography (PE/EA = 4/1), **31** was obtained as a white solid (58.2 mg, 0.166 mmol, 83 %).  $R_f$  = 0.40 (PE/EA = 4/1).

**$^1\text{H}$  NMR (600 MHz, DMSO)**  $\delta$  9.65 (s, 1H), 8.22 (dd,  $J$  = 7.9, 1.2 Hz, 1H), 7.99 – 7.96 (m, 3H), 7.93 – 7.91 (m, 1H), 7.85 – 7.83 (m, 1H), 7.62 – 7.59 (m, 2H), 3.31 (s, 3H), 3.00 (t,  $J$  = 7.3 Hz, 2H), 1.58 (m,  $J$  = 7.4, 6.4, 1.3 Hz, 2H), 1.35 – 1.31 (m, 2H), 0.89 (t,  $J$  = 7.3 Hz, 3H).

**$^{13}\text{C}$  NMR (151 MHz, DMSO)**  $\delta$  200.2, 190.6, 162.8, 143.0, 137.5, 136.4, 135.3, 134.1, 131.6, 130.5, 128.6, 128.4, 127.5, 126.9, 123.8, 90.4, 51.9, 38.2, 26.4, 22.2, 14.3.

ESI-MS: calculated for  $\text{C}_{21}\text{H}_{22}\text{NO}_4$   $[\text{M}+\text{H}]^+$  : 352.1543, found: 352.1543.

### 3-(3-chlorophenyl)-3-methoxy-2,3-dihydroisoquinoline-1,4-dione (**32**)

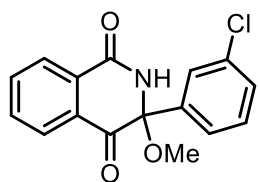

The title compound was prepared *via* the general procedure, after purification by silica gel column chromatography (PE/EA = 4/1), **32** was obtained as a white solid (37.9 mg, 0.126 mmol, 63 %).  $R_f$  = 0.40 (PE/EA = 4/1).

**$^1\text{H}$  NMR (400 MHz, DMSO- $d_6$ )**  $\delta$  9.64 (s, 1H), 8.21 (d,  $J$  = 7.7 Hz, 1H), 8.00 – 7.91 (m, 2H), 7.84 (t,  $J$  = 7.4 Hz, 1H), 7.51 (s, 1H), 7.43 (dd,  $J$  = 13.7, 4.8 Hz, 3H), 3.27 (s, 3H).

**$^{13}\text{C}$  NMR (101 MHz, DMSO- $d_6$ )**  $\delta$  190.0, 162.4, 140.3, 136.0, 133.7, 133.1, 131.1, 130.3, 130.0, 129.0, 128.1, 126.6, 126.5, 125.5, 89.4, 51.4.

ESI-MS: calculated for  $\text{C}_{16}\text{H}_{13}\text{ClNO}_3$   $[\text{M}+\text{H}]^+$  : 302.0578, found: 302.0578.

### 3-methoxy-3-(naphthalen-2-yl)-2,3-dihydroisoquinoline-1,4-dione (**33**)

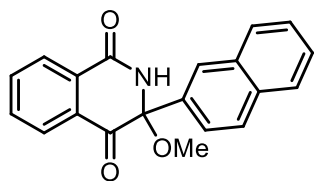

The title compound was prepared *via* the general procedure, after purification by silica gel column chromatography (PE/EA = 4/1), **33** was obtained as a colourless oil (43.1 mg, 0.136 mmol, 68 %).  $R_f$  = 0.50 (PE/EA = 4/1).

**$^1\text{H}$  NMR (600 MHz, Chloroform- $d$ )**  $\delta$  8.38 (d,  $J$  = 7.8 Hz, 1H), 8.04 – 8.00 (m, 2H), 7.87 – 7.81 (m, 4H), 7.74 – 7.70 (m, 2H), 7.52 – 7.45 (m, 2H), 6.57 (s, 1H), 3.52 (s, 3H).

**$^{13}\text{C}$  NMR (151 MHz, Chloroform- $d$ )**  $\delta$  190.0, 163.4, 135.6, 135.3, 133.8, 133.8, 132.9, 131.0, 130.9, 129.0, 128.9, 128.7, 127.8, 127.4, 127.2, 126.7, 126.1, 123.9, 91.3, 52.4.

ESI-MS: calculated for C<sub>20</sub>H<sub>16</sub>NO<sub>3</sub> [M+H]<sup>+</sup>: 318.1124, found: 318.1124.

### 3-butyl-3-methoxy-2,3-dihydroisoquinoline-1,4-dione (34)

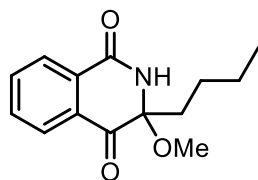

The title compound was prepared via the general procedure, after purification by silica gel column chromatography (PE/EA = 4/1), 34 was obtained as a colourless oil (24.7 mg, 0.10 mmol, 50 %). R<sub>f</sub> = 0.4 (PE/EA = 4/1).

**<sup>1</sup>H NMR (600 MHz, DMSO)** δ 9.09 (s, 1H), 8.14 (dd, J = 7.7, 1.2 Hz, 1H), 8.00 (dd, J = 7.8, 1.3 Hz, 1H), 7.94 (td, J = 7.5, 1.3 Hz, 1H), 7.88 – 7.80 (m, 1H), 3.04 (s, 3H), 2.04 – 1.95 (m, 1H), 1.77 (td, J = 12.7, 3.8 Hz, 1H), 1.26 – 1.17 (m, 4H), 0.79 (t, J = 7.1 Hz, 3H).

**<sup>13</sup>C NMR (151 MHz, DMSO)** δ 192.7, 162.6, 136.2, 134.8, 133.9, 131.4, 128.4, 126.3, 89.4, 50.9, 37.4, 25.7, 22.6, 14.2.

ESI-MS: calculated for C<sub>14</sub>H<sub>18</sub>NO<sub>3</sub> [M+H]<sup>+</sup>: 248.1281, found: 248.1281

## 7. Synthetic Transformation of 2 to 37-45

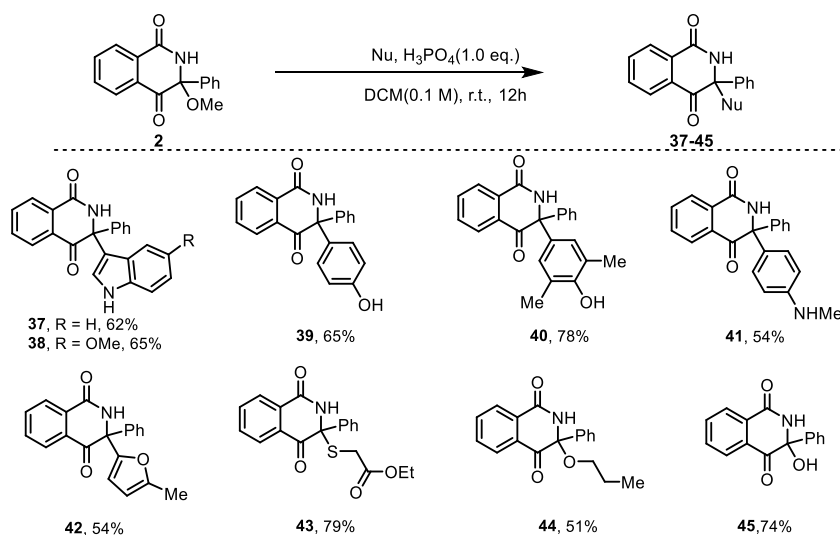

In a 15 mL pressure tube, compound **3** (0.1 mmol), phosphoric acid (0.12 mmol), and nucleophile (0.12 mmol) were combined and dissolved in 2 mL of dichloromethane. The mixture was stirred at 25°C overnight to ensure full conversion. Upon completion of the reaction, the volatile components were removed under reduced pressure. The crude residue was then purified by flash

column chromatography on silica gel using a petroleum ether/ethyl acetate eluent system, yielding the target product **37-45** (51-79% yield).

#### Characterization Data of **37**

**<sup>1</sup>H NMR (600 MHz, DMSO)**  $\delta$  11.16 (s,  $J$  = 2.8 Hz, 1H), 9.41 (s, 1H), 8.12 (dd,  $J$  = 7.8, 1.3 Hz, 1H), 7.93 (dd,  $J$  = 7.7, 1.3 Hz, 1H), 7.88 (td,  $J$  = 7.6, 1.3 Hz, 1H), 7.77 (td,  $J$  = 7.5, 1.3 Hz, 1H), 7.43 – 7.36 (m, 6H), 7.19 (dd,  $J$  = 8.0, 1.1 Hz, 1H), 7.10 (ddd,  $J$  = 8.2, 7.0, 1.1 Hz, 1H), 6.92 (ddd,  $J$  = 8.0, 7.0, 1.0 Hz, 1H), 6.79 (d,  $J$  = 2.7 Hz, 1H).

**<sup>13</sup>C NMR (151 MHz, DMSO)**  $\delta$  193.0, 162.2, 140.6, 137.4, 135.6, 133.7, 131.9, 131.2, 128.8, 128.6, 128.1, 127.9, 127.0, 126.4, 125.6, 122.0, 120.5, 119.6, 116.1, 112.4, 70.5.

ESI-MS: calculated for C<sub>23</sub>H<sub>17</sub>N<sub>2</sub>O<sub>2</sub> [M+H]<sup>+</sup> : 353.1284, found: 353.1284

#### Characterization Data of **38**

**<sup>1</sup>H NMR (600 MHz, DMSO)**  $\delta$  11.02 (d,  $J$  = 2.8 Hz, 1H), 9.39 (s, 1H), 8.10 (d,  $J$  = 7.8 Hz, 1H), 7.92 (d,  $J$  = 7.7 Hz, 1H), 7.86 (t,  $J$  = 7.5 Hz, 1H), 7.76 (t,  $J$  = 7.6 Hz, 1H), 7.40 – 7.31 (m, 5H), 7.29 (dd,  $J$  = 8.8, 1.5 Hz, 1H), 6.81 (t,  $J$  = 2.0 Hz, 1H), 6.76 (dt,  $J$  = 8.8, 2.0 Hz, 1H), 6.63 (d,  $J$  = 2.4 Hz, 1H), 3.55 (d,  $J$  = 1.8 Hz, 3H).

**<sup>13</sup>C NMR (151 MHz, DMSO)**  $\delta$  192.7, 162.1, 153.5, 140.7, 135.5, 133.7, 132.6, 131.9, 131.2, 128.7, 128.5, 128.1 (d,  $J$  = 11.1 Hz), 126.9 (d,  $J$  = 7.0 Hz), 126.0, 115.3, 113.0, 111.4, 103.2, 70.5, 55.7.

ESI-MS: calculated for C<sub>24</sub>H<sub>19</sub>N<sub>2</sub>O<sub>3</sub> [M+H]<sup>+</sup> : 383.1390, found: 383.1390

#### Characterization Data of **39**

**<sup>1</sup>H NMR (600 MHz, DMSO)**  $\delta$  9.64 (s, 1H), 9.46 (s, 1H), 8.08 (dd,  $J$  = 7.8, 1.3 Hz, 1H), 7.95 – 7.92 (m, 1H), 7.87 (td,  $J$  = 7.6, 1.3 Hz, 1H), 7.79 (td,  $J$  = 7.6, 1.3 Hz, 1H), 7.37 – 7.32 (m, 3H), 7.23 – 7.21 (m, 2H), 7.06 – 7.02 (m, 2H), 6.76 – 6.73 (m, 2H).

**<sup>13</sup>C NMR (151 MHz, DMSO)**  $\delta$  194.0, 162.0, 157.7, 141.7, 135.7, 133.8, 131.9, 131.3, 131.2, 129.6, 128.7, 128.6, 128.4, 128.0, 126.9, 115.5, 73.9.

ESI-MS: calculated for C<sub>21</sub>H<sub>16</sub>NO<sub>3</sub> [M+H]<sup>+</sup> : 330.1124, found: 330.1124

#### Characterization Data of **40**



**<sup>1</sup>H NMR (600 MHz, DMSO)** δ 9.42 (s, 1H), 8.47 (s, 1H), 8.09 (d, J = 7.7 Hz, 1H), 7.95 (d, J = 7.7 Hz, 1H), 7.87 (t, J = 7.6 Hz, 1H), 7.78 (t, J = 7.5 Hz, 1H), 7.34 (dq, J = 14.1, 7.2 Hz, 3H), 7.22 (d, J = 7.5 Hz, 2H), 6.81 (s, 2H), 2.11 (s, 6H).

**<sup>13</sup>C NMR (151 MHz, DMSO)** δ 193.9, 162.0, 153.6, 141.8, 135.6, 133.8, 131.9, 131.4, 131.2, 128.6 (d, J = 12.0 Hz), 128.4, 128.2, 128.0, 126.9, 124.4, 73.9, 17.4.

ESI-MS: calculated for C<sub>23</sub>H<sub>20</sub>NO<sub>3</sub> [M+H]<sup>+</sup> : 358.1437, found: 358.1437

#### Characterization Data of **41**

**<sup>1</sup>H NMR (400 MHz, DMSO-d<sub>6</sub>)** δ 11.14 (s, 1H), 9.39 (s, 1H), 8.11 (d, J = 7.7 Hz, 1H), 7.91 (t, J = 7.0 Hz, 1H), 7.89 – 7.84 (m, 1H), 7.79 – 7.74 (m, 1H), 7.41 – 7.34 (m, 6H), 7.19 (d, J = 8.0 Hz, 1H), 7.09 (t, J = 7.3 Hz, 1H), 6.92 (t, J = 7.5 Hz, 1H), 6.78 (d, J = 2.6 Hz, 1H).

**<sup>13</sup>C NMR (101 MHz, DMSO-d<sub>6</sub>)** δ 192.5, 161.7, 140.2, 136.9, 135.1, 133.3, 131.5, 130.7, 128.3, 128.1, 127.6, 127.4, 126.5, 126.0, 125.2, 121.5, 120.1, 119.1, 115.6, 111.9, 70.0.

ESI-MS: calculated for C<sub>22</sub>H<sub>19</sub>N<sub>2</sub>O<sub>2</sub> [M+H]<sup>+</sup> : 343.1441, found: 343.1441

#### Characterization Data of **42**

**<sup>1</sup>H NMR (400 MHz, Chloroform-d)** δ 8.52 (s, 1H), 8.24 (d, J = 7.6 Hz, 1H), 8.02 (d, J = 7.6 Hz, 1H), 7.76 (t, J = 7.5 Hz, 1H), 7.67 (t, J = 7.5 Hz, 1H), 7.49 – 7.47 (m, 2H), 7.34 – 7.31 (m, 3H), 7.24 (d, J = 8.9 Hz, 1H), 6.94 (d, J = 2.7 Hz, 1H), 6.82 (dd, J = 8.9, 2.3 Hz, 1H), 6.79 (s, 1H), 6.63 (d, J = 2.1 Hz, 1H), 3.63 (s, 3H).

**<sup>13</sup>C NMR (151 MHz, Chloroform-d)** δ 191.6, 162.8, 154.3, 139.7, 134.8, 133.4, 132.2, 131.3, 131.0, 128.8, 128.7, 128.3, 127.6, 127.5, 125.9, 125.6, 116.2, 112.9, 112.4, 102.7, 70.9, 55.9.

#### Characterization Data of **43**

**<sup>1</sup>H NMR (600 MHz, DMSO)** δ 9.63 (s, 1H), 8.14 (dd, J = 7.7, 1.3 Hz, 1H), 7.97 (dd, J = 7.8, 1.2 Hz, 1H), 7.94 (td, J = 7.5, 1.3 Hz, 1H), 7.84 (td, J = 7.5, 1.3 Hz, 1H), 7.60 – 7.57 (m, 2H), 7.44 – 7.40 (m, 2H), 7.39 – 7.36 (m, 1H), 3.94 – 3.88 (m, 1H), 3.85 – 3.79 (m, 1H), 3.51 (d, J = 15.5 Hz, 1H), 3.37 (s, 1H), 1.00 (t, J = 7.1 Hz, 3H).

**<sup>13</sup>C NMR (151 MHz, DMSO)** δ 188.3, 169.2, 161.7, 137.9, 136.0, 134.0, 131.3, 130.6, 129.4, 129.1, 128.2, 127.7, 127.4, 75.0, 61.4, 33.5, 14.1.

ESI-MS: calculated for C<sub>19</sub>H<sub>18</sub>NO<sub>4</sub>S [M+H]<sup>+</sup> : 356.0951, found: 356.0951

#### Characterization Data of **44**

**<sup>1</sup>H NMR (600 MHz, DMSO)**  $\delta$  9.54 (s, 1H), 8.19 (d,  $J$  = 7.8 Hz, 1H), 7.95 (td,  $J$  = 7.6, 1.3 Hz, 1H), 7.90 (d,  $J$  = 7.6 Hz, 1H), 7.83 (d,  $J$  = 2.2 Hz, 1H), 7.82 – 7.78 (m, 1H), 7.50 – 7.45 (m, 2H), 7.41 – 7.32 (m, 3H), 3.54 (dt,  $J$  = 8.6, 6.4 Hz, 1H), 1.58 (h,  $J$  = 7.1 Hz, 2H), 0.89 (t,  $J$  = 7.4 Hz, 3H).

**<sup>13</sup>C NMR (151 MHz, DMSO)**  $\delta$  191.2, 162.8, 138.9, 136.2, 134.8, 134.0, 131.7, 130.6, 129.4, 128.8, 128.5, 127.0, 126.9, 123.4, 90.3, 65.7, 23.1, 11.0.

ESI-MS: calculated for C<sub>18</sub>H<sub>18</sub>NO<sub>3</sub> [M+H]<sup>+</sup> : 296.1281, found: 296.1280

#### Characterization Data of **45**

**<sup>1</sup>H NMR (400 MHz, Chloroform-d)**  $\delta$  8.23 (d,  $J$  = 8.9 Hz, 1H), 7.70 (dd,  $J$  = 7.5, 1.2 Hz, 1H), 7.61 – 7.58 (m, 1H), 7.57 – 7.53 (m, 1H), 7.40 – 7.37 (m, 2H), 7.32 (d,  $J$  = 5.9 Hz, 4H), 7.09 (d,  $J$  = 7.3 Hz, 1H), 6.88 (t,  $J$  = 7.4 Hz, 1H), 6.70 (d,  $J$  = 7.9 Hz, 1H), 5.93 (s, 1H), 2.72 (s, 3H).

**<sup>13</sup>C NMR (101 MHz, Chloroform-d)**  $\delta$  163.6, 151.9, 136.2, 135.8, 132.8, 130.4, 129.7, 129.6, 129.2, 128.9, 128.8, 127.2, 127.0, 124.7, 119.9, 108.7, 93.8, 72.9, 27.6.

ESI-MS: calculated for C<sub>15</sub>H<sub>12</sub>NO<sub>3</sub> [M+H]<sup>+</sup> : 254.0811, found: 254.0811

## 8. Gram Scale Reaction

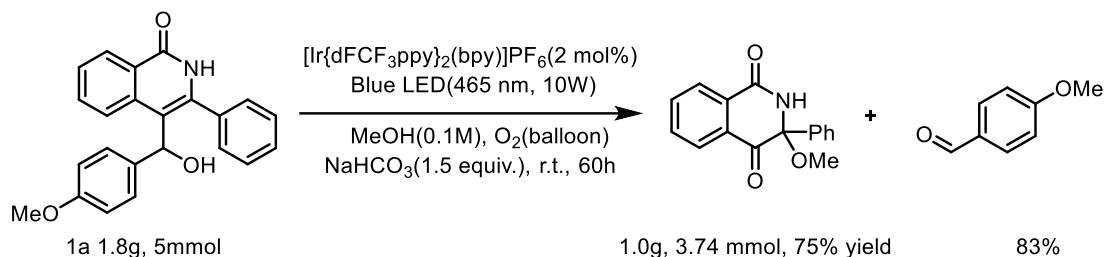

A 50 mL-round bottom flask charged with a stirring bar, was added 4-(hydroxy(4-methoxyphenyl)methyl)-3-phenylisoquinolin-1(2H)-one **1a** (5 mmol, 1 equiv.) and,  $[\text{Ir}\{\text{dFCF}_3\text{ppy}\}_2(\text{bpy})]\text{PF}_6$  (100 mg, 0.10 mmol, 2.0 mol%),  $\text{NaHCO}_3$  (630 mg, 7.5 mmol, 1.5 equiv.), dry MeOH (50.0 mL) were added subsequently into the reaction vessel. The reaction was allowed to stir at 25 °C for 60 hours. The reaction mixture was then diluted with EtOAc (20 mL) and washed with brine. The aqueous phase was extracted with EtOAc again. The organic layers were combined, washed with brine and dried over  $\text{Na}_2\text{SO}_4$ . The pure product was purified by flash column chromatography on silica with an appropriate solvent to afford the pure product (75%).

## 9. Derivatization of 2

Synthetic Transformation of **2** to **46**

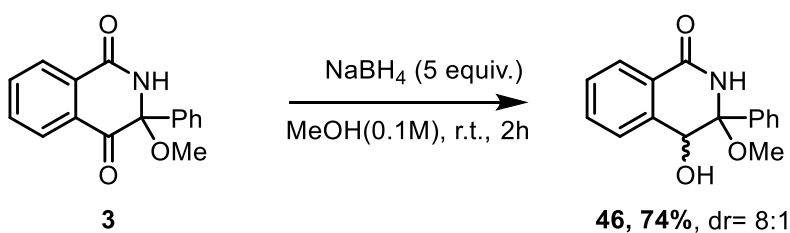

A 15 mL-schlenk tube was charged with **2** (0.1 mmol) and  $\text{NaBH}_4$  (0.5 mmol) in MeOH (2.0 mL), the mixture was stirred at room temperature until the complete consumption of **2** as monitored by TLC analysis (typically 2.0 hours). The reaction mixture was then diluted with EtOAc (5.0 mL) and washed with brine. The aqueous phase was extracted with EtOAc again. The organic layers were combined, washed with brine and dried over  $\text{Na}_2\text{SO}_4$ . The mixture was concentrated in vacuo

and purified by flash chromatography on silica gel (petroleum ether/ethyl acetate) to afford the corresponding product (19.9mg, 74 % yield).

**<sup>1</sup>H NMR (600 MHz, DMSO)** δ 9.00 (s, 1H), 7.96 (dd, J = 7.7, 1.4 Hz, 1H), 7.56 (dd, J = 7.5, 1.4 Hz, 1H), 7.53 – 7.51 (m, 2H), 7.47 (dd, J = 7.5, 1.2 Hz, 1H), 7.43 (dd, J = 8.4, 6.8 Hz, 2H), 7.39 (dd, J = 7.7, 1.1 Hz, 1H), 7.37 (t, J = 7.3 Hz, 1H), 5.46 (d, J = 7.4 Hz, 1H), 4.35 (dd, J = 7.5, 1.5 Hz, 1H), 2.94 (s, 3H).

**<sup>13</sup>C NMR (151 MHz, DMSO)** δ 165.7, 141.3, 138.4, 132.7, 129.2, 128.4, 128.4, 128.3, 128.2, 127.6, 127.3, 91.2, 72.1, 49.6.

ESI-MS: calculated for C<sub>16</sub>H<sub>16</sub>NO<sub>3</sub>[M+H]<sup>+</sup>: 270.1124, found: 270.1124.

#### Synthetic Transformation of **2** to **47**

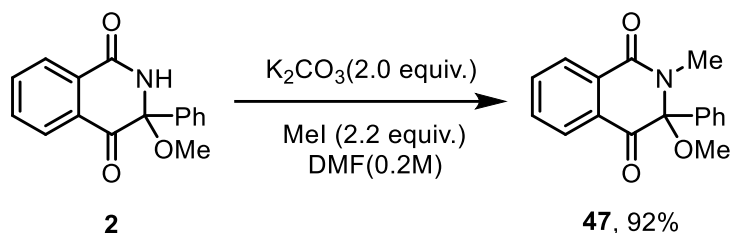

A 15 mL-schlenk tube was charged with **2** (0.1 mmol) in DMF (2.0 mL), then iodomethane (31 mg, 0.22 mmol) and K<sub>2</sub>CO<sub>3</sub> (27.6mg, 0.2 mmol) was added respectively. The mixture at room temperature for 12.0 h. The reaction mixture was then diluted with EtOAc (5.0 mL) and washed with brine. The aqueous phase was extracted with EtOAc again. The organic layers were combined, washed with brine and dried over Na<sub>2</sub>SO<sub>4</sub>. The mixture was concentrated in vacuo and purified by flash chromatography on silica gel (petroleum ether/ethyl acetate) to afford the corresponding product (26 mg, 92 % yield).

**<sup>1</sup>H NMR (600 MHz, DMSO)** δ 8.33 (d, J = 7.9 Hz, 1H), 8.01 (td, J = 7.6, 1.3 Hz, 1H), 7.93 (d, J = 7.7 Hz, 1H), 7.83 (td, J = 7.6, 1.3 Hz, 1H), 7.36 (qd, J = 7.5, 2.1 Hz, 6H), 3.28 (s, 3H), 2.84 (s, 3H).

**<sup>13</sup>C NMR (151 MHz, DMSO)** δ 190.4, 162.2, 137.2, 136.8, 134.0, 131.7, 130.1, 129.7, 129.5, 129.0, 126.9, 126.4, 94.6, 52.1, 28.9.

ESI-MS: calculated for C<sub>17</sub>H<sub>16</sub>NO<sub>3</sub> [M+H]<sup>+</sup> : 282.1124, found: 282.1124

#### Synthetic Transformation of **2** to **48**

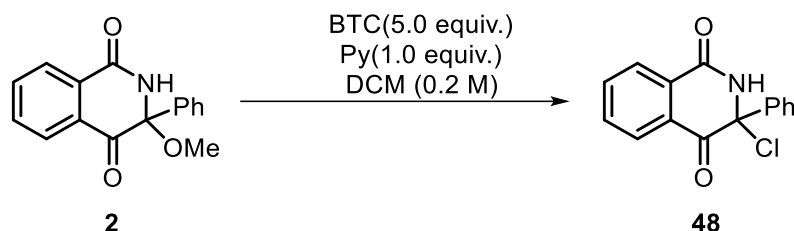

In a nitrogen-filled environment, triphosgene (0.5 mmol, 5equiv.) was dissolved in dichloromethane (DCM) inside a 15 mL pressure tube, and the mixture was cooled to 0°C. Pyridine (0. mmol, 1 equiv.) was slowly added dropwise, followed by the addition of compound **2** (0.1 mmol, 1 equiv.) dissolved in DCM. The mixture was allowed to warm to room temperature and stirred overnight to ensure complete reaction. Once the reaction was finished, it was quenched with hydrochloric acid (HCl), and the desired product was extracted using dichloromethane. The organic layer was washed with saturated sodium bicarbonate solution to neutralize any remaining acid and then dried over anhydrous sodium sulfate. After removing the dichloromethane under reduced pressure, the crude product was obtained. The crude material was dissolved in diethyl ether (Et<sub>2</sub>O), and the insoluble solids were filtered off. The filtrate was concentrated to afford the final product (12.7 mg, 47 % yield).

**<sup>1</sup>H NMR (600 MHz, DMSO)** δ 9.32 (s, 1H), 8.16 (d, J = 7.8 Hz, 1H), 7.92 (td, J = 7.5, 1.2 Hz, 1H), 7.88 (d, J = 7.6 Hz, 1H), 7.79 (td, J = 7.5, 1.2 Hz, 1H), 7.48 – 7.46 (m, 2H), 7.34 (dd, J = 13.0, 7.2 Hz, 3H).

**<sup>13</sup>C NMR (151 MHz, DMSO)** δ 192.7, 161.8, 140.6, 135.7, 133.7, 132.1, 130.2, 128.9, 128.6, 128.2, 126.9 (d, J = 7.9 Hz), 85.9.

ESI-MS: calculated for C<sub>15</sub>H<sub>11</sub>ClNO<sub>2</sub> [M+H]<sup>+</sup> : 272.0472, found: 272.0472

### Synthetic Transformation of **3** to **49**

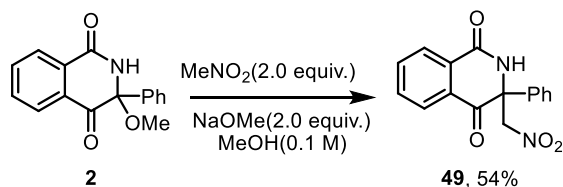

In a 15 mL pressure tube, compound **2** (0.1 mmol), nitromethane (MeNO<sub>2</sub>, 0.2 mmol), and sodium methoxide (NaOMe, 0.2 mmol) were combined and dissolved in 2 mL of methanol. The resulting mixture was stirred at room temperature overnight to ensure complete reaction. The mixture was then diluted with CH<sub>2</sub>Cl<sub>2</sub> and filtered through celite. All volatiles were removed under reduced pressure. The purification was performed by flash column chromatography on silica gel (petroleum ether/ethyl acetate) to afford the corresponding product (16.0 mg, 54 % yield).

**<sup>1</sup>H NMR (600 MHz, DMSO)** δ 9.43 (s, 1H), 8.18 (dd, J = 7.8, 1.2 Hz, 1H), 7.99 – 7.92 (m, 2H), 7.82 (td, J = 7.6, 1.3 Hz, 1H), 7.48 – 7.43 (m, 2H), 7.40 (dd, J = 8.7, 6.8 Hz, 2H), 7.37 – 7.34 (m, 1H), 6.27 (d, J = 15.1 Hz, 1H), 4.93 (d, J = 15.1 Hz, 1H).

**<sup>13</sup>C NMR (151 MHz, DMSO)** δ 190.7, 162.0, 136.5, 136.4, 134.1, 131.5, 130.2, 129.8, 129.6, 128.5, 127.1, 126.3, 80.2, 68.1.

ESI-MS: calculated for C<sub>16</sub>H<sub>13</sub>N<sub>2</sub>O<sub>4</sub> [M+H]<sup>+</sup> : 297.0869, found: 297.0869

## 10. Mechanistic Studies

**Scheme S1. Preliminary Mechanistic Studies**

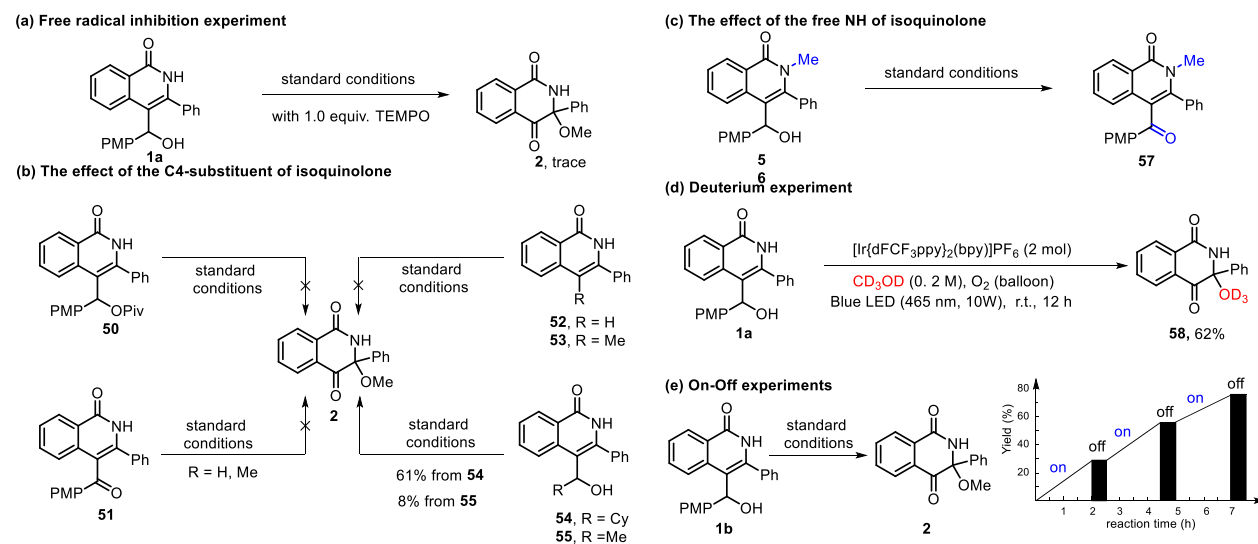

## 9.1 Radical and singlet oxygen trapping experiments

### 9.1.1 Radical trapping experiment

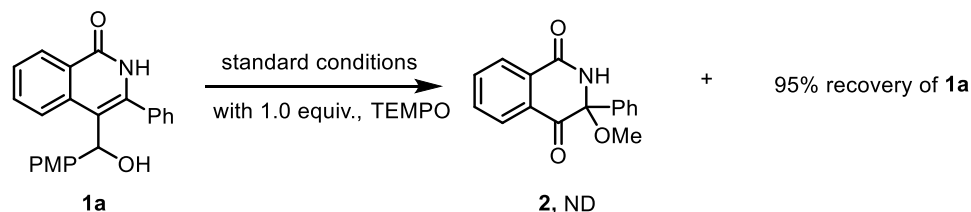

In a 10 mL quartz tube equipped with a stir bar, 4-(hydroxy(4-methoxyphenyl)methyl)-3-phenylisoquinolin-1(2H)-one **1a** (0.1 mmol, 1 equiv.), [Ir{dFCF<sub>3</sub>ppy}<sub>2</sub>(bpy)]PF<sub>6</sub> (2.0 mol%), NaHCO<sub>3</sub> (0.15 mmol, 1.5 equiv.), 2,2,6,6-tetramethylpiperidine-1-oxyl (0.10 mmol, 1.0 equiv.), and dry methanol (2.0 mL) were added sequentially. The reaction mixture was stirred at 25°C for 12 hours. Subsequently, thin-layer chromatography (TLC) monitoring indicated no formation of the target product **2**. The reaction solution was removed under reduced pressure, the crude product was obtained for <sup>1</sup>H NMR analysis, the spectrum clearly shows the absence of new proton signals that could be assigned to a TEMPO-derived product. And the mixture was concentrated in vacuo and purified by flash chromatography on silica gel (petroleum ether/ethyl acetate) to recover the start material **1a** (34.3 mg, 96 % of **1a** was recovered).

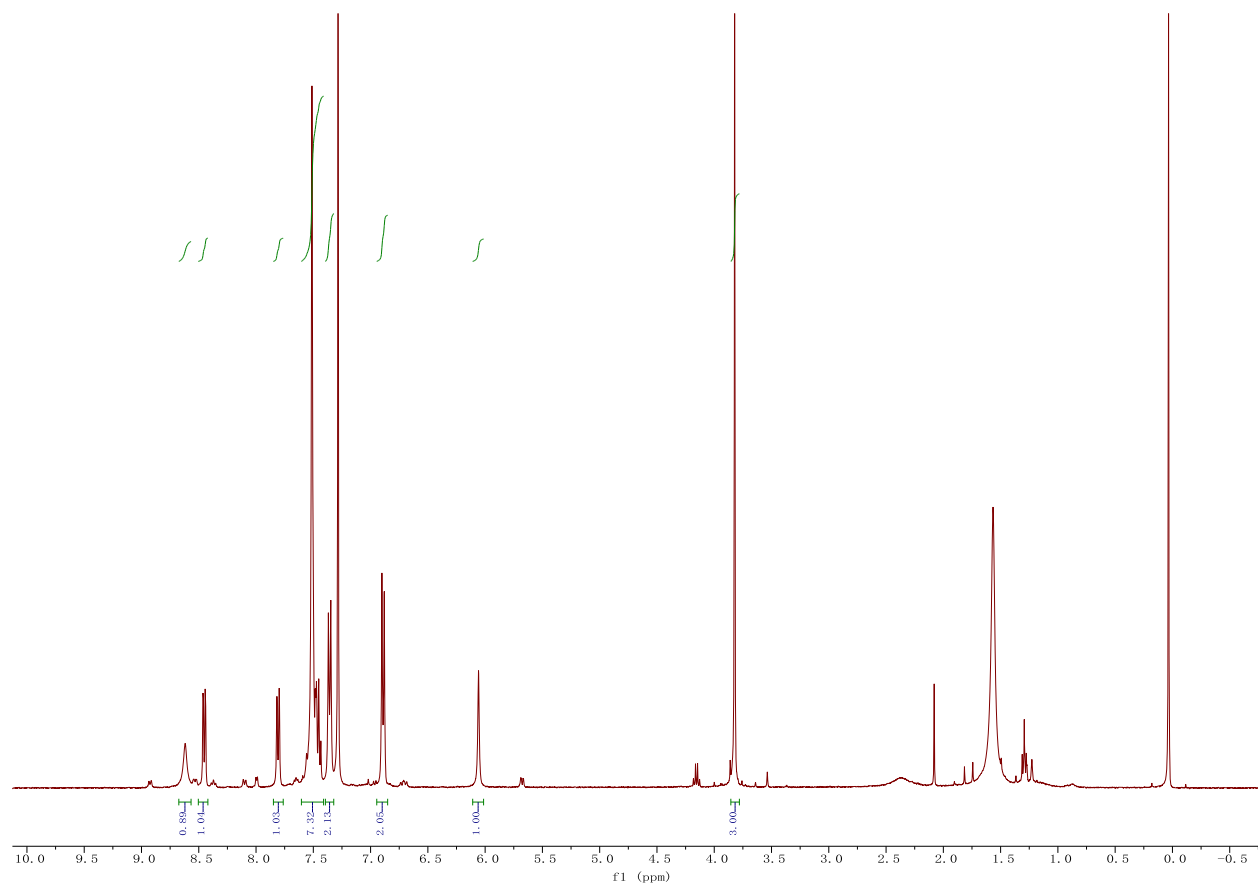

### 9.1.2 Singlet oxygen (<sup>1</sup>O<sub>2</sub>) trapping experiment

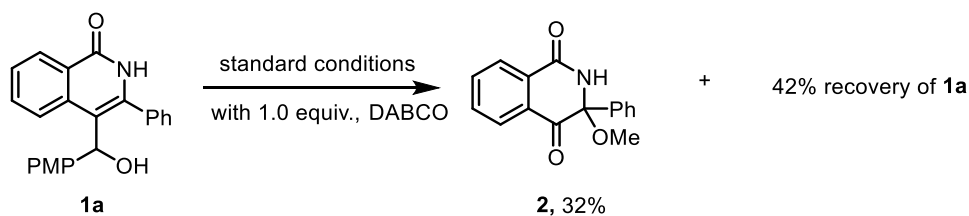

1a
 standard conditions
2, 13%
43%

with 1.0 equiv., DMA

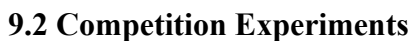

## S28



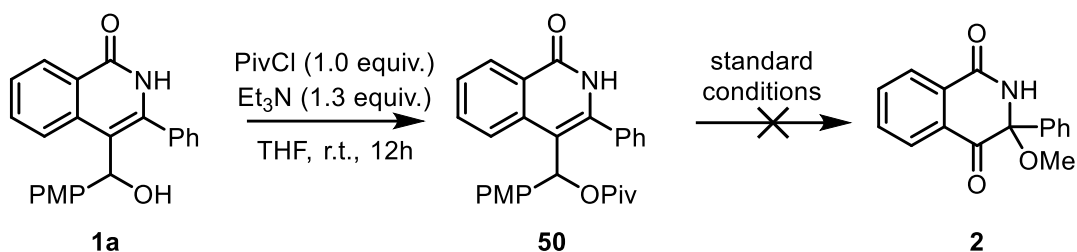

The 4-(1-hydroxy-2-(4-methoxyphenyl)ethyl)-3-phenylisoquinolin-1(2H)-one (**1a**, 2mmol) was dissolved in dry THF and Et<sub>3</sub>N (1.3 equiv.) under argon atmosphere followed by dropwise addition of trimethylacetyl chloride (1.0 equiv.). After stirring at 25 °C for 12 h, the reaction mixture was extracted with water (30 mL) and EtOAc (3 x 20 mL). The organic layer was separated and dried over anhydrous MgSO<sub>4</sub>, filtered and concentrated in *vacuo*. The crude was purified by flash column chromatography and the product **48** was obtained as white solid. Compound **48** was subjected to the standard conditions of the photocatalytic reaction. After monitoring by TLC, no target product **2** was observed.

#### Characterization Data of **50**

**<sup>1</sup>H NMR (600 MHz, DMSO)** δ 8.24 – 8.21 (m, 1H), 7.94 – 7.91 (m, 1H), 7.66 – 7.63 (m, 2H), 7.61 – 7.59 (m, 2H), 7.52 – 7.48 (m, 2H), 7.47 – 7.44 (m, 1H), 7.15 – 7.12 (m, 2H), 6.85 – 6.82 (m, 2H), 6.47 (d, *J* = 4.0 Hz, 1H), 6.19 (d, *J* = 3.9 Hz, 1H), 3.68 (s, 3H), 1.45 (s, 9H).

**<sup>13</sup>C NMR (151 MHz, DMSO)** δ 176.7, 158.2, 154.7, 149.8, 140.0, 137.8, 136.8, 130.8, 130.2, 129.8, 128.7, 128.6, 128.3, 128.2, 127.0, 123.7, 121.7, 114.0, 70.1, 55.4, 27.3.

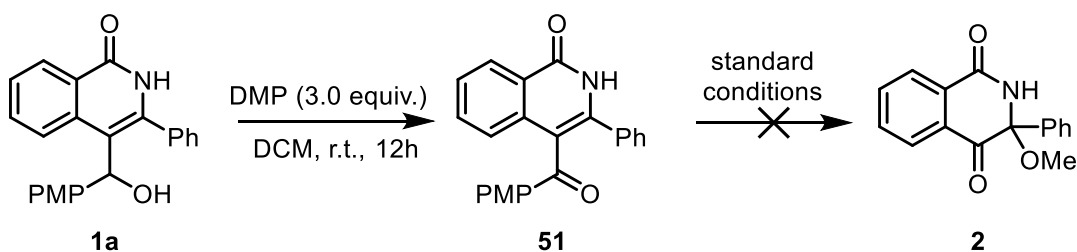

The 4-(1-hydroxy-2-(4-methoxyphenyl)ethyl)-3-phenylisoquinolin-1(2H)-one (**1a**, 2mmol) was dissolved in dry DCM and DMP (3 equiv.) under argon atmosphere. After stirring at 25 °C for 12 h, the reaction mixture was extracted with water (30 mL) and EtOAc (3 x 20 mL). The organic layer was separated and dried over anhydrous MgSO<sub>4</sub>, filtered and concentrated in *vacuo*. The crude was purified by flash column chromatography and the product **49** was obtained as white solid.

Compound **49** was subjected to the standard conditions of the photocatalytic reaction. After monitoring by TLC, no target product **2** was observed.

#### Characterization Data of **51**

**<sup>1</sup>H NMR (600 MHz, DMSO)**  $\delta$  11.77 (s, 1H), 8.35 – 8.32 (m, 1H), 7.69 (d,  $J$  = 8.8 Hz, 2H), 7.67 – 7.65 (m, 1H), 7.55 (ddd,  $J$  = 8.1, 7.1, 1.1 Hz, 1H), 7.40 – 7.37 (m, 2H), 7.30 (dd,  $J$  = 5.0, 1.7 Hz, 3H), 7.27 – 7.25 (m, 1H), 6.87 – 6.84 (m, 2H), 3.75 (s, 3H).

**<sup>13</sup>C NMR (151 MHz, DMSO)**  $\delta$  194.5, 163.9, 162.3, 140.0, 136.1, 133.9, 133.4, 132.3, 131.0, 129.9, 129.5, 128.6, 127.6, 127.3, 125.2, 124.6, 114.9, 114.4, 56.0.

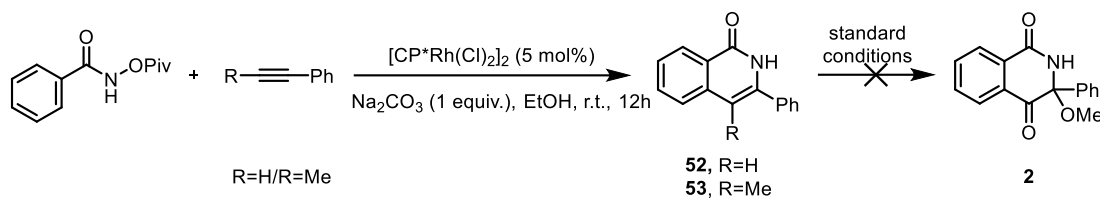

In an 8 mL reaction tube, the mixture of *N*-(pivaloyloxy)benzamide (0.25 mmol), phenylacetylene/prop-1-yn-1-ylbenzene (0.3 mmol),  $[\text{Cp}^*\text{RhCl}_2]_2$  (5.0 mol%) and  $\text{Na}_2\text{CO}_3$  (1.0 equiv.) was added EtOH. Then the resulting mixture was stirred for 16 h. When the reaction was finished, the desired product precipitated out as a solid, and the product was simply collected by filtration. For some cases, if the precipitation did not occur, the reaction mixture was subjected directly to flash chromatography on silica gel (petroleum ether/ethyl acetate) to provide the desired products **51/52**. Compound **51/52** was subjected to the standard conditions of the photocatalytic reaction. After monitoring by TLC, no target product **2** was observed.

The compounds **52** and **53** were prepared according to a known procedure and the characterization data matches those reported in the literature<sup>4</sup> and literature,<sup>5</sup> respectively.

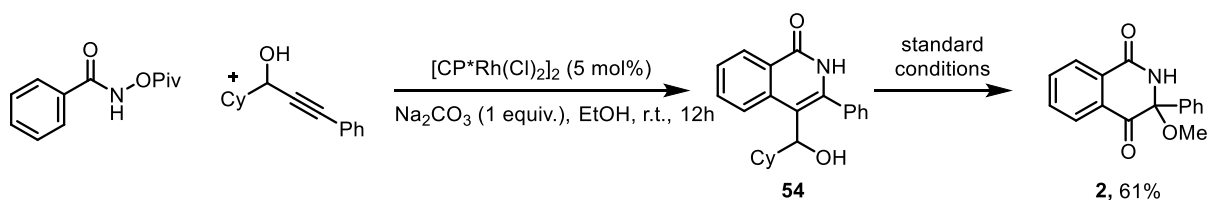

In an 8 mL reaction tube, the mixture of *N*-(pivaloyloxy)benzamide (0.25 mmol), 1-cyclohexyl-3-phenylprop-2-yn-1-ol (0.3 mmol),  $[\text{Cp}^*\text{RhCl}_2]_2$  (5.0 mol%) and  $\text{Na}_2\text{CO}_3$  (1.0 equiv.) was added EtOH. Then the resulting mixture was stirred for 16 h. When the reaction was finished, the desired product precipitated out as a solid, and the product was simply collected by filtration. For some

cases, if the precipitation did not occur, the reaction mixture was subjected directly to flash chromatography on silica gel (petroleum ether/ethyl acetate) to provide the desired products **53**. Compound **54** was subjected to the standard conditions of the photocatalytic reaction. The reaction was monitored by TLC until completion. After separation and purification, the target product **3** was successfully obtained (61% yield).

### 9.2.2 The effect of the free NH of isoquinolone

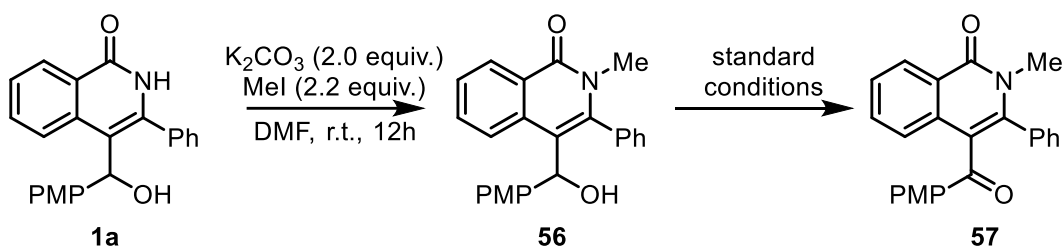

A 15 mL-schlenk tube was charged with **1a** (0.2 mmol) in DMF, then Iodomethane (0.22 mmol) and  $\text{K}_2\text{CO}_3$  (0.2 mmol) was added respectively. The mixture at room temperature for 12.0 h. The reaction mixture was then diluted with EtOAc and washed with brine. The aqueous phase was extracted with EtOAc again. The organic layers were combined, washed with brine and dried over  $\text{Na}_2\text{SO}_4$ . The mixture was concentrated in vacuo and purified by flash chromatography on silica gel (petroleum ether/ethyl acetate) to afford the corresponding product **55**. Compound **55** was subjected to the standard conditions of the photocatalytic reaction. The reaction was monitored by TLC until completion. After separation and purification, the oxidized product **56** was successfully obtained.

#### Characterization Data of **56**

**$^1\text{H}$  NMR (600 MHz, DMSO)**  $\delta$  8.3 (ddd,  $J = 7.8, 1.7, 0.6$  Hz, 1H), 7.8 – 7.8 (m, 0H), 7.6 (td,  $J = 3.1, 1.0$  Hz, 2H), 7.6 – 7.5 (m, 1H), 7.5 – 7.5 (m, 2H), 7.4 (ddd,  $J = 8.4, 7.0, 1.7$  Hz, 1H), 7.4 (ddd,  $J = 8.3, 7.1, 1.3$  Hz, 1H), 7.3 – 7.2 (m, 2H), 6.8 – 6.8 (m, 2H), 5.9 – 5.9 (m, 1H), 5.3 (s, 1H), 3.7 (s, 3H), 3.2 (s, 3H).

**$^{13}\text{C}$  NMR (151 MHz, DMSO)**  $\delta$  162.0, 158.1, 142.5, 136.6, 135.2, 135.1, 131.4, 129.7 (d,  $J = 2.7$  Hz), 129.5 (d,  $J = 6.7$  Hz), 129.3, 127.6 (d,  $J = 8.9$  Hz), 126.8, 126.5, 126.2, 116.4, 113.8, 70.3, 55.3, 34.3.

#### Characterization Data of **57**

**$^1\text{H}$  NMR (600 MHz, DMSO)**  $\delta$  8.38 (dt,  $J$  = 8.1, 2.0 Hz, 1H), 7.71 – 7.64 (m, 3H), 7.57 (tdd,  $J$  = 7.9, 2.8, 1.2 Hz, 1H), 7.33 (dp,  $J$  = 11.1, 2.7 Hz, 5H), 7.14 (dd,  $J$  = 8.1, 2.8 Hz, 1H), 6.87 (dd,  $J$  = 9.0, 2.7 Hz, 2H), 3.78 (s, 2H), 3.22 (s, 2H).

**$^{13}\text{C}$  NMR (151 MHz, DMSO)**  $\delta$  193.9, 163.9, 162.0, 141.6, 134.5, 133.5, 133.3, 132.3, 130.8, 129.6, 128.7, 128.0, 127.6, 124.6, 124.4, 117.1, 114.4, 56.0, 34.0.

### 9.3 Deuteration experiment

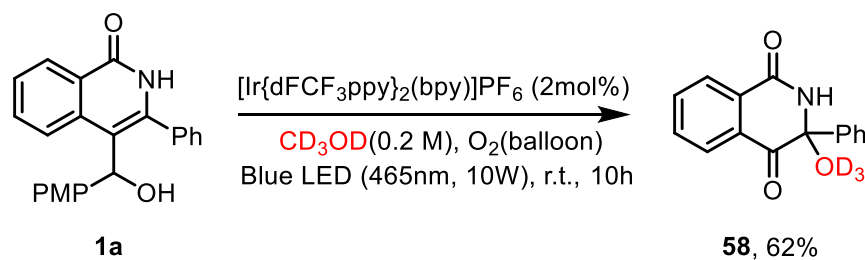

#### Synthesis of deuterated substrate 58

In a 10 mL quartz tube equipped with a stir bar, 4-(hydroxy(4-methoxyphenyl)methyl)-3-phenylisoquinolin-1(2H)-one **1a** (0.1 mmol, 1 equiv.),  $[\text{Ir}\{\text{dFCF}_3\text{ppy}\}_2(\text{bpy})]\text{PF}_6$  (2.0 mol%), sodium bicarbonate (0.15 mmol, 1.5 equiv.), and deuterated methanol (2.0 mL) were added sequentially. The reaction mixture was stirred at 25°C for 10 hours. Afterwards, the reaction mixture was diluted with ethyl acetate (20 mL) and washed with brine. The aqueous phase was extracted again with ethyl acetate. The organic phases were combined, washed with brine, and dried over anhydrous sodium sulfate. The crude product was purified by flash column chromatography on silica gel using an appropriate solvent system to afford the pure product **57** in 62% yield.

#### Characterization Data of 58

**$^1\text{H}$  NMR (600 MHz, DMSO)**  $\delta$  9.55 (s, 1H), 8.20 (dd,  $J$  = 7.9, 1.2 Hz, 1H), 7.95 (td,  $J$  = 7.6, 1.4 Hz, 1H), 7.90 (dd,  $J$  = 7.7, 1.3 Hz, 1H), 7.81 (td,  $J$  = 7.5, 1.3 Hz, 1H), 7.47 – 7.45 (m, 2H), 7.39 – 7.35 (m, 3H).

ESI-MS: calculated for  $\text{C}_{15}\text{H}_{11}\text{D}_3\text{NO}_3$   $[\text{M}+\text{H}]^+$ : 259.1156, found: 259.1156

### 9.4 Light on–off experiment

From the profile of the reaction with the light ON/OFF over time, it was observed that the transformation progressed smoothly under light, but no further conversion was observed when the

light was turned off, which suggested that the transformation requires the constant participation of light.

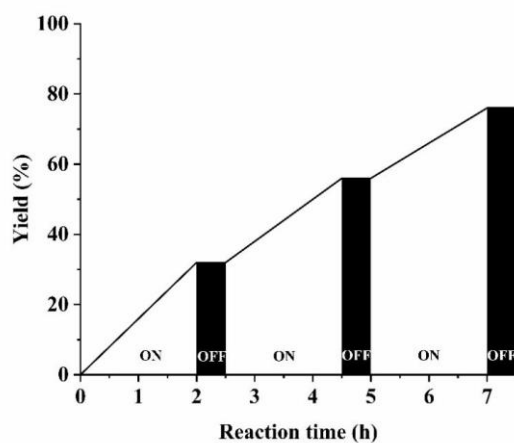

## 11. References

1. Qi, T.; N. Fang;; W. Huang;; J. Chen;; Y. Luo, Y. Xia, *Org. Lett.* **2022**, *24*, 5674-5678
2. Y. Li, H. Xu, L. Huang, Z. Zhou, Z. Tang, H. Meng, W. Zhang , W. Yi, and X. Wu , *Org. Chem. Front.*, **2023**, *10*, 3000 -3009
3. H. Meng, H. Xu, Z. Zhou, Z. Tang, Y. Li, Y. Zhou, W. Yi, and X. Wu, *Green Chem.*, **2022**, *24*, 7012 -7021.
4. M.-Y. Xu, C. Wang, W.-T. Jiang, B. Xiao, *Adv. Synth. Catal.*, **2020**, *362*, 1706.
5. N. Guimond, S. I. Gorelsky, and K. Fagnou, *J. Am. Chem. Soc.*, **2011**, *133*, 16, 6449-6457.

### 3-methoxy-3-phenyl-2,3-dihydroisoquinoline-1,4-dione (2)

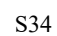

RS15 #548 RT: 3.02 AV: 1 NL: 1.06E6  
T: FTMS + p ESI Full ms [100.0000-1500.0000]

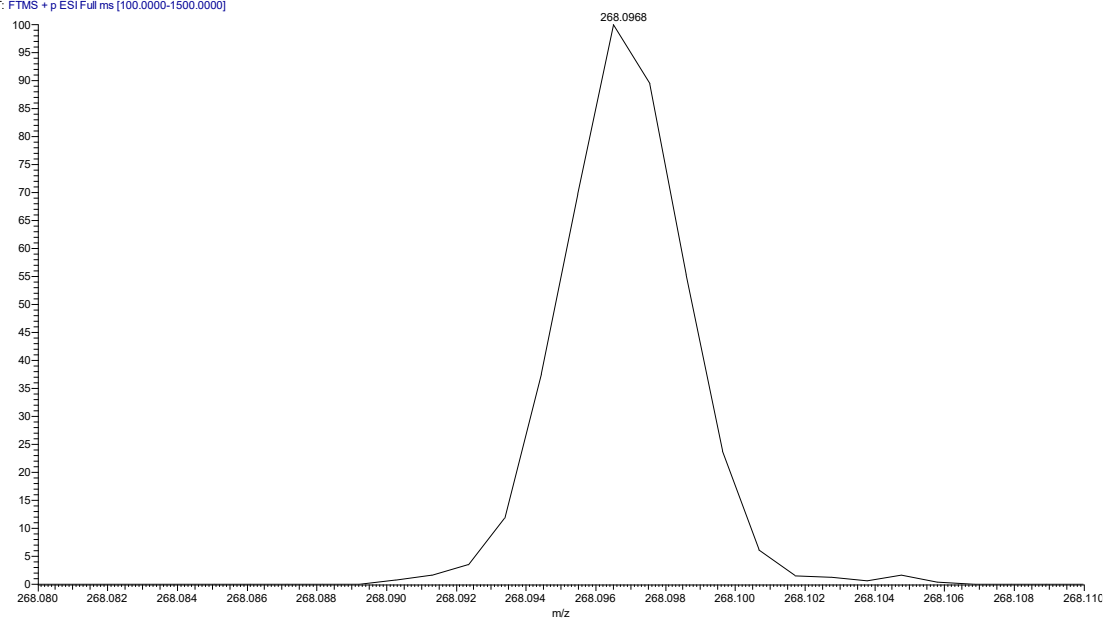

### 3-methoxy-6-methyl-3-phenyl-2,3-dihydroisoquinoline-1,4-dione (3)

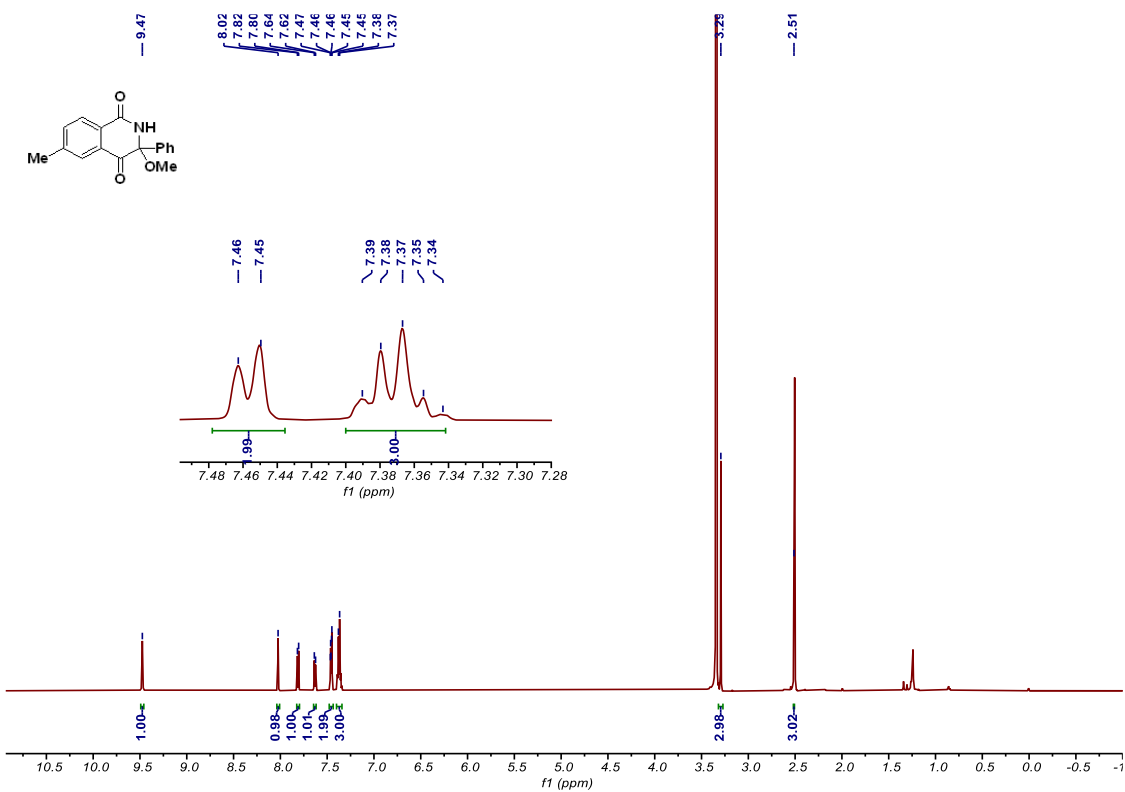

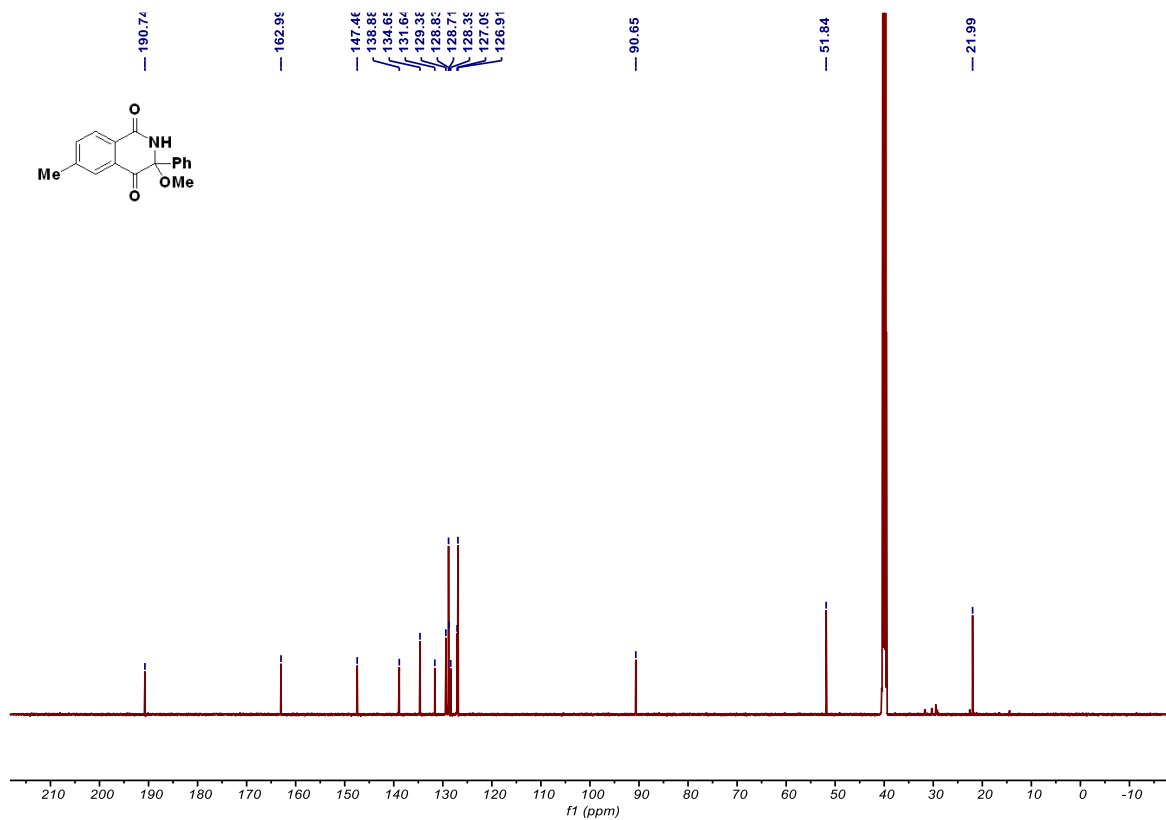

RS13 #3542 RT: 19.90 AV: 1 NL: 1.43E6  
T: FTMS + p ESI Full ms [100.0000-1500.0000]

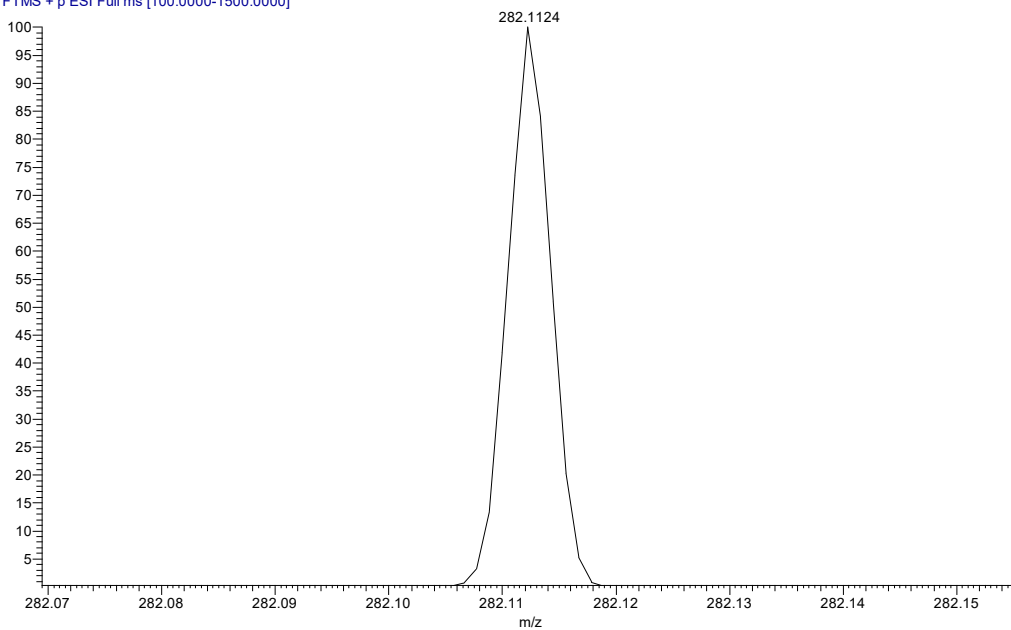



### 6-ethyl-3-methoxy-3-phenyl-2,3-dihydroisoquinoline-1,4-dione (4)

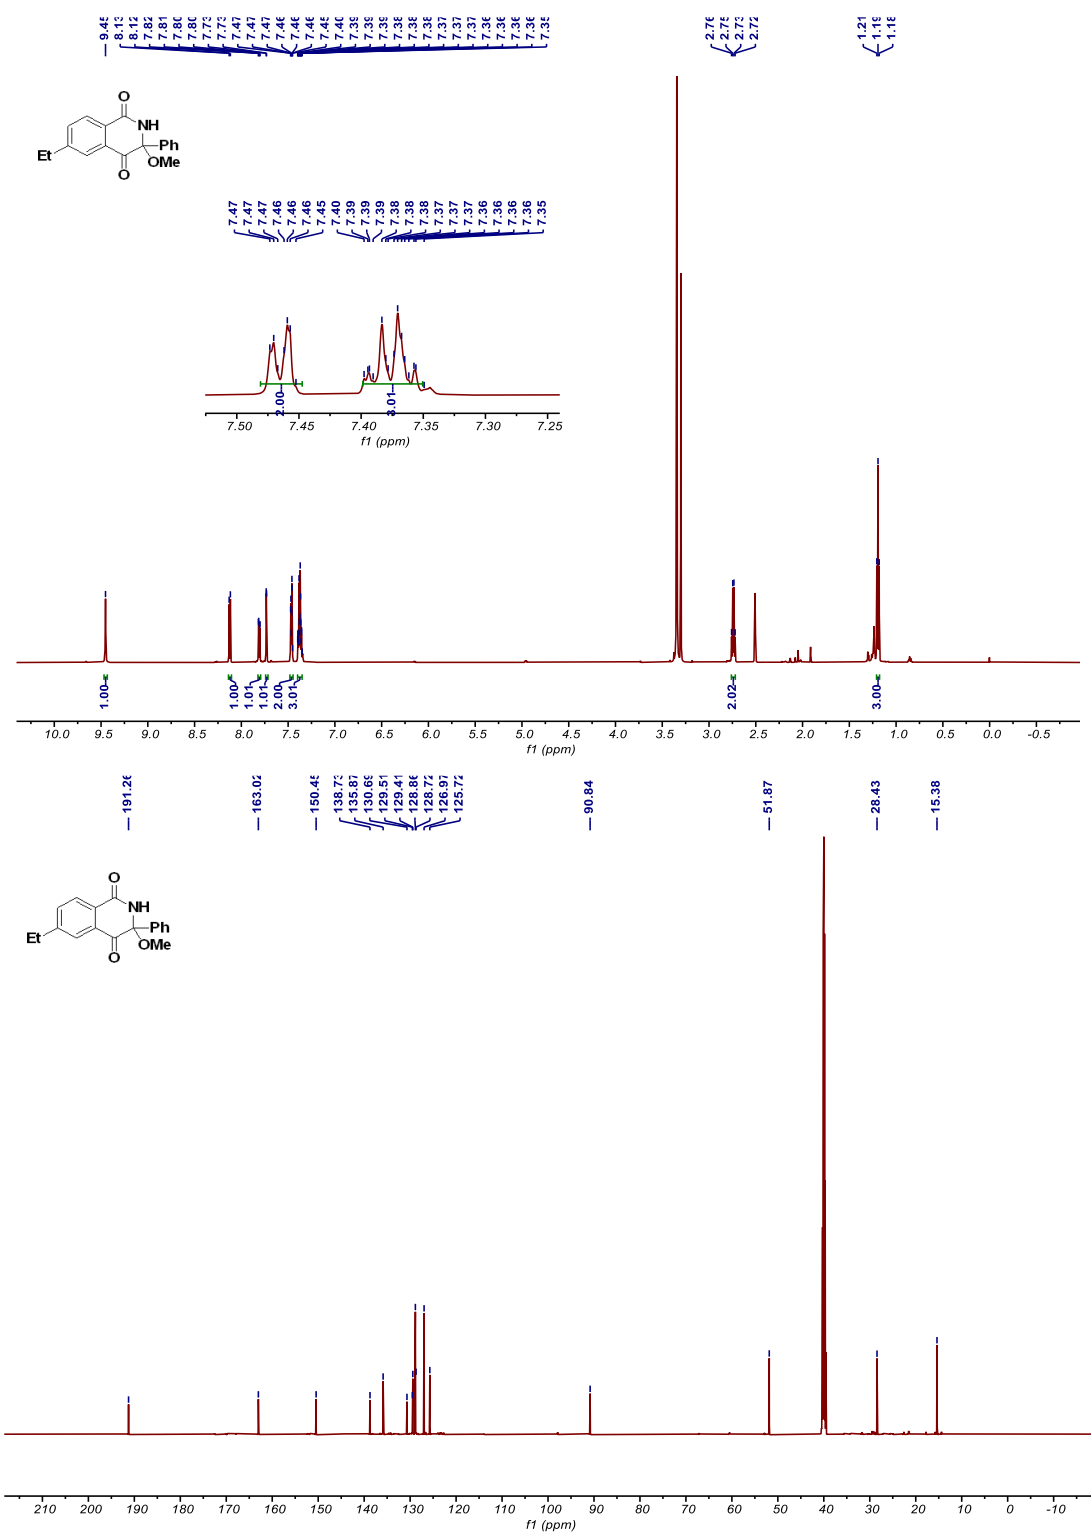

RS13 #3205 RT: 18.10 AV: 1 NL: 5.84E6  
T: FTMS + p ESI Full ms [100.0000-1500.0000]

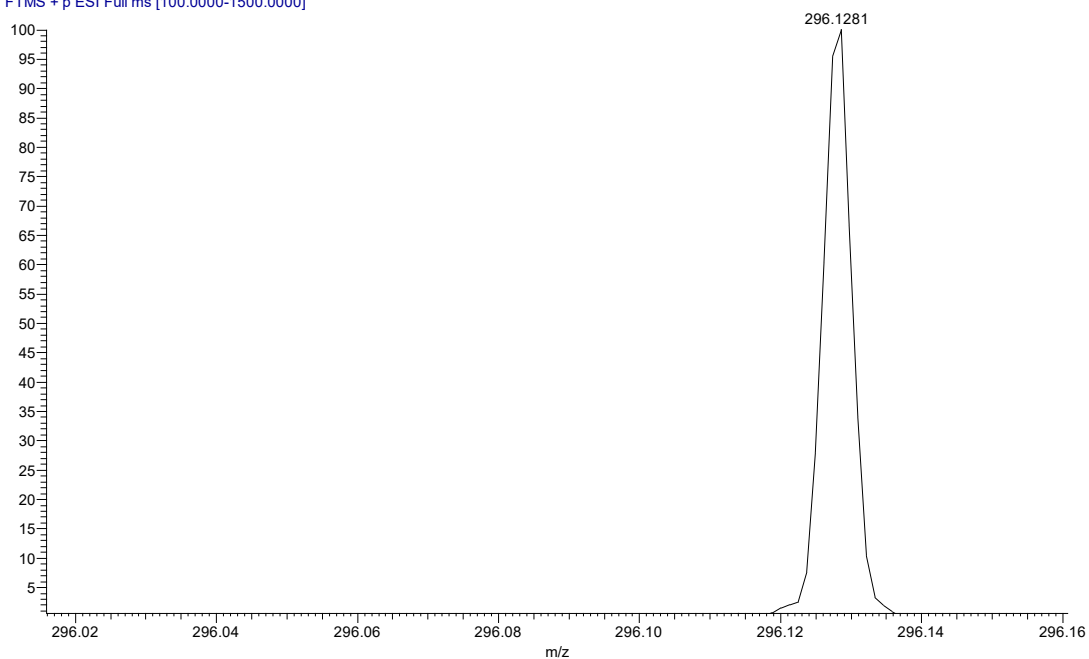

# 6-(chloromethyl)-3-methoxy-3-phenyl-2,3-dihydroisoquinoline-1,4-dione (5)

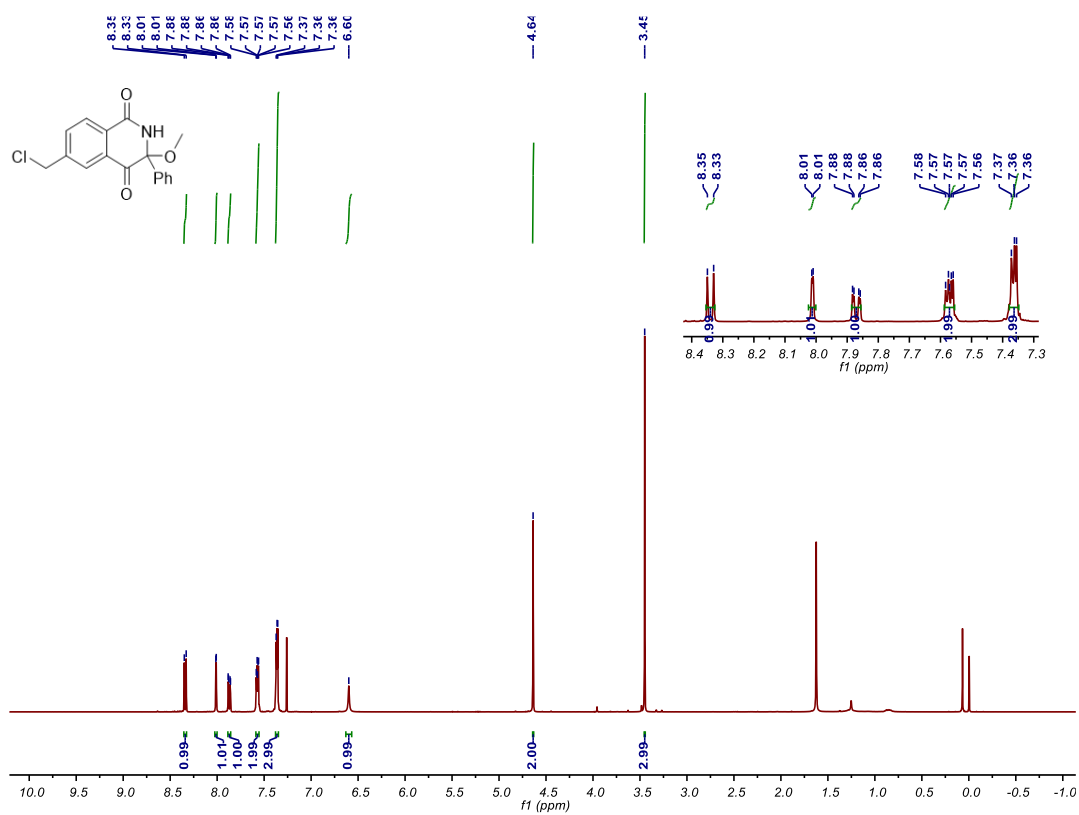

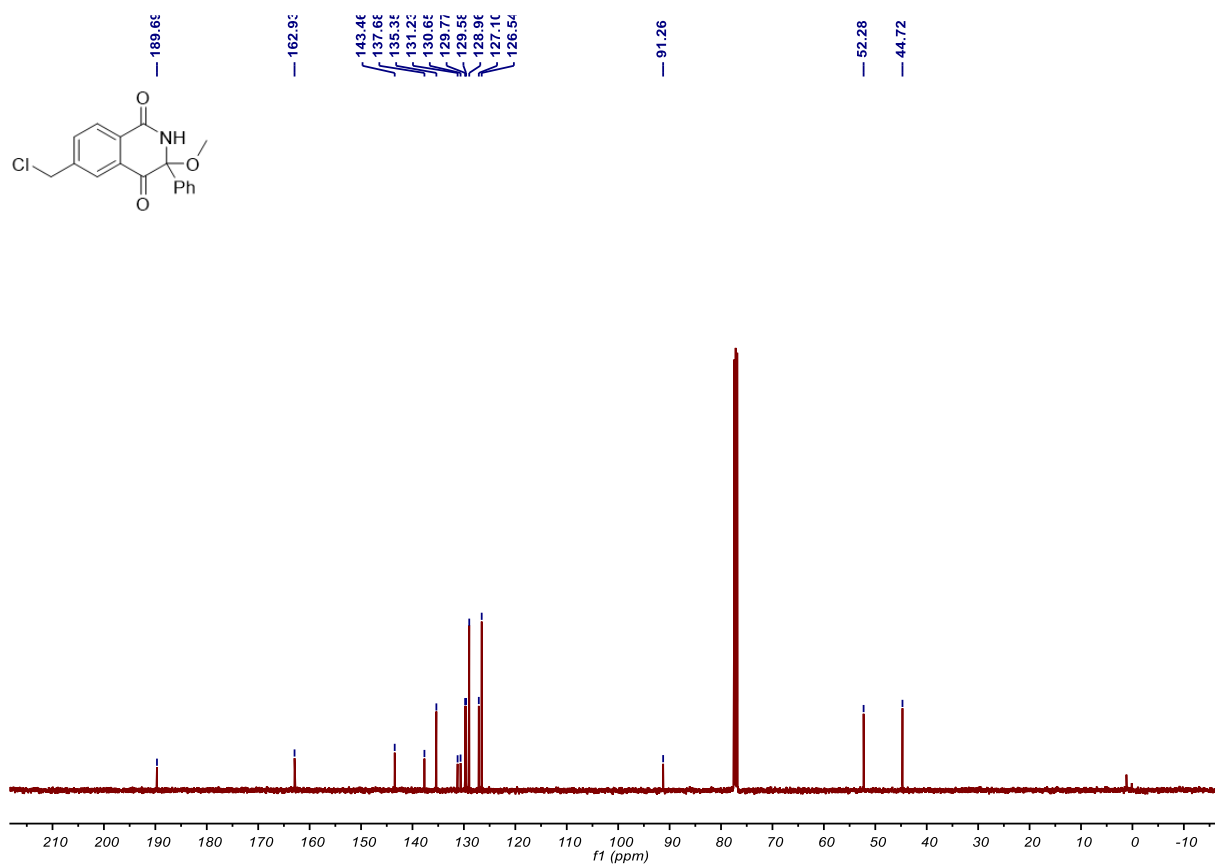

RS11 #2839 RT: 16.04 AV: 1 NL: 1.62E4  
T: FTMS + p ESI Full ms [100.0000-1500.0000]

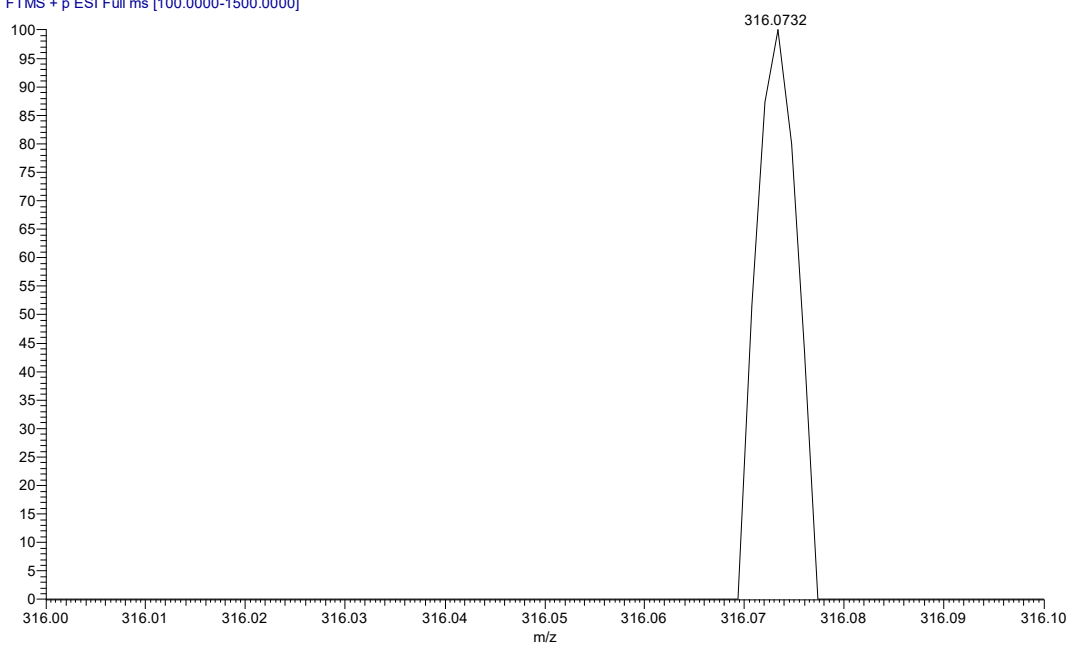

# 6-(tert-butyl)-3-methoxy-3-phenyl-2,3-dihydroisoquinoline-1,4-dione (6)

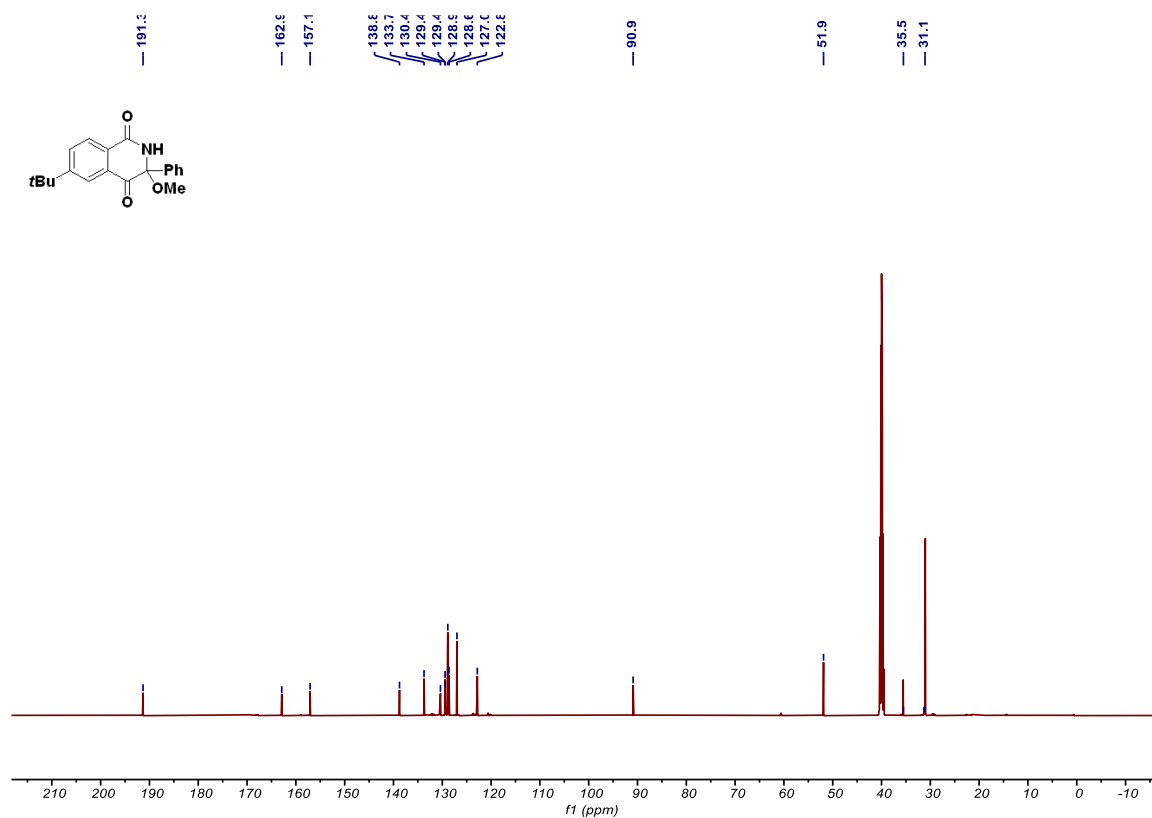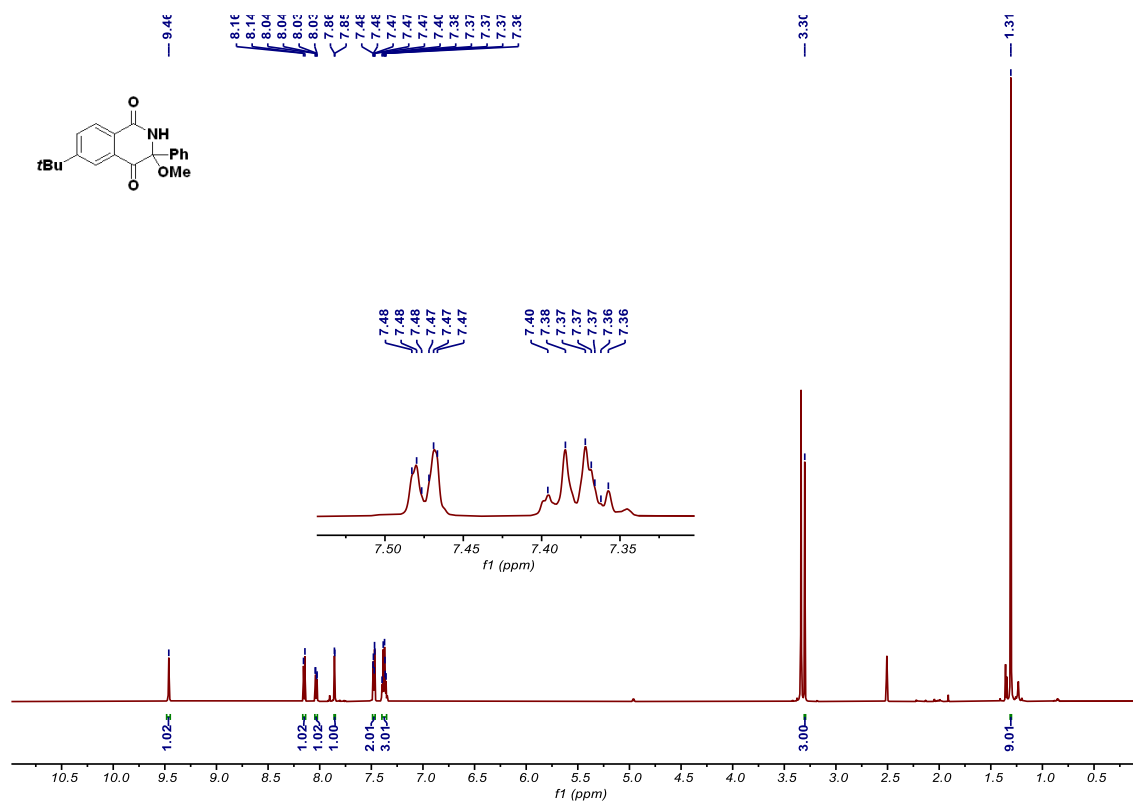

RS13 #3605 RT: 20.24 AV: 1 NL: 3.51E6  
T: FTMS + p ESI Full ms [100.0000-1500.0000]

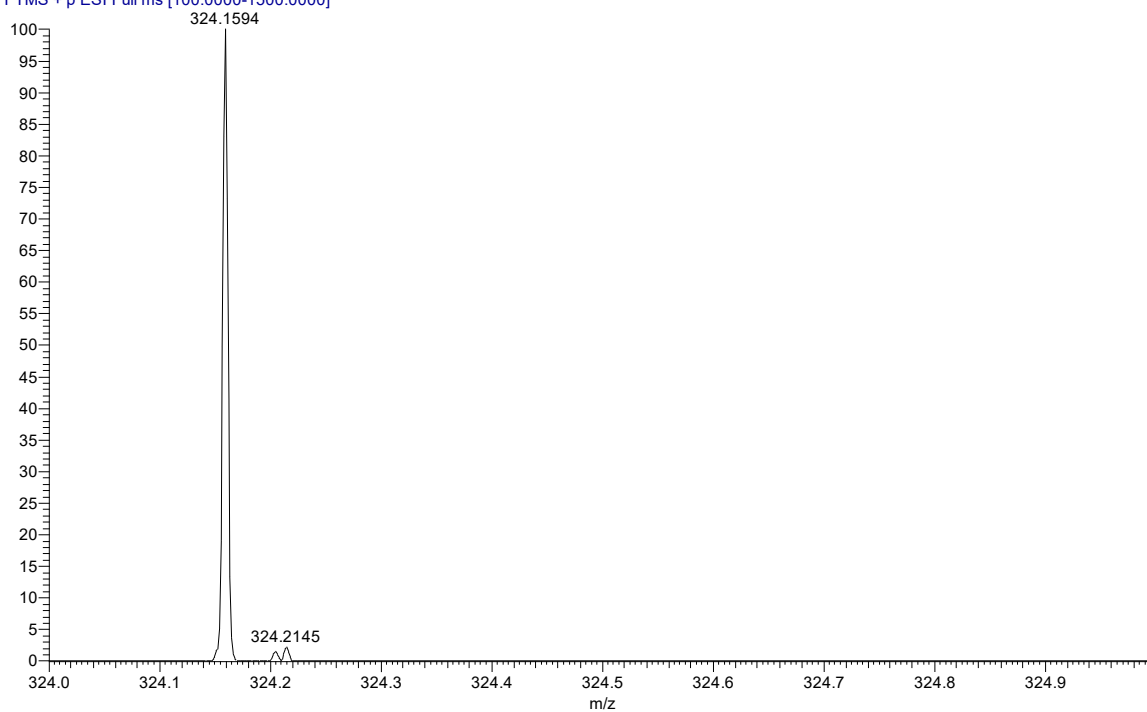

# 6-fluoro-3-methoxy-3-phenyl-2,3-dihydroisoquinoline-1,4-dione (7)

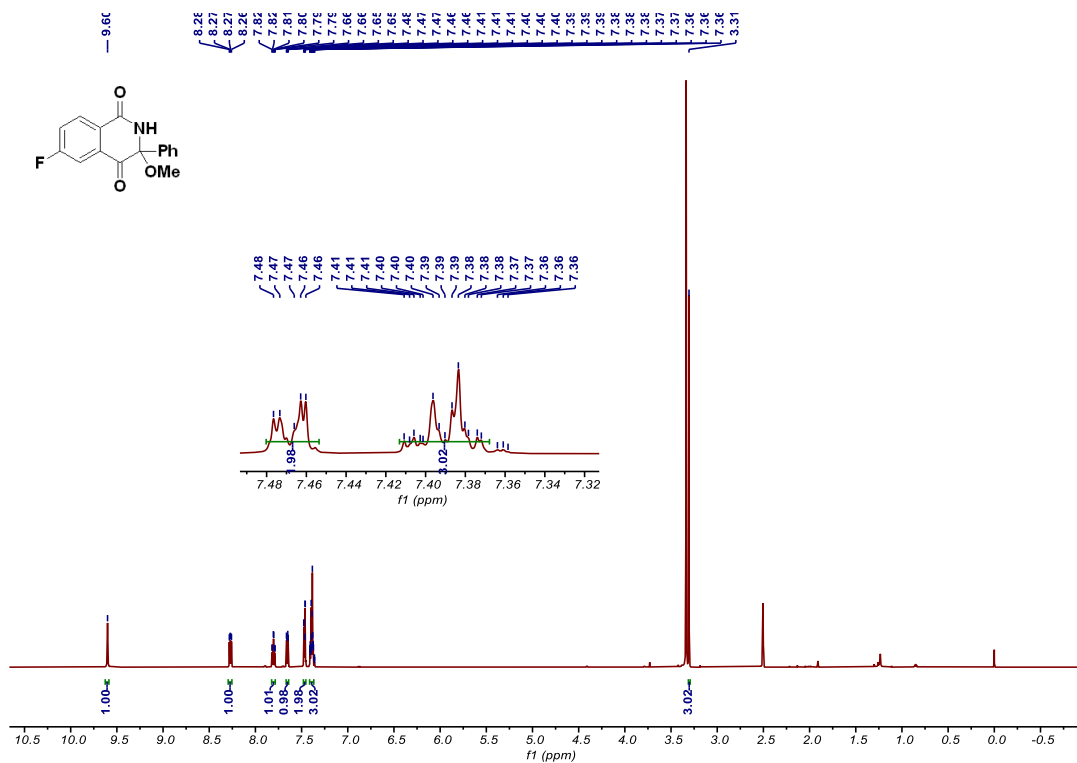

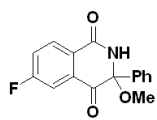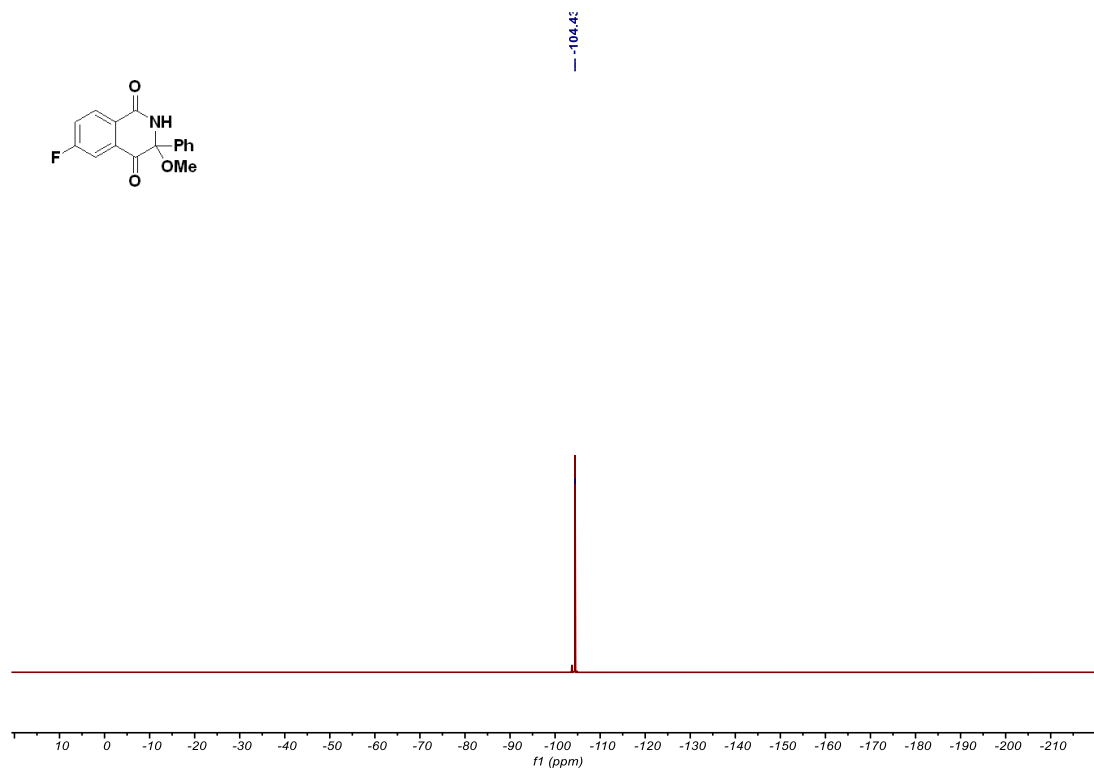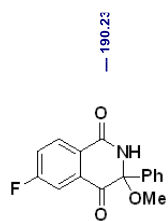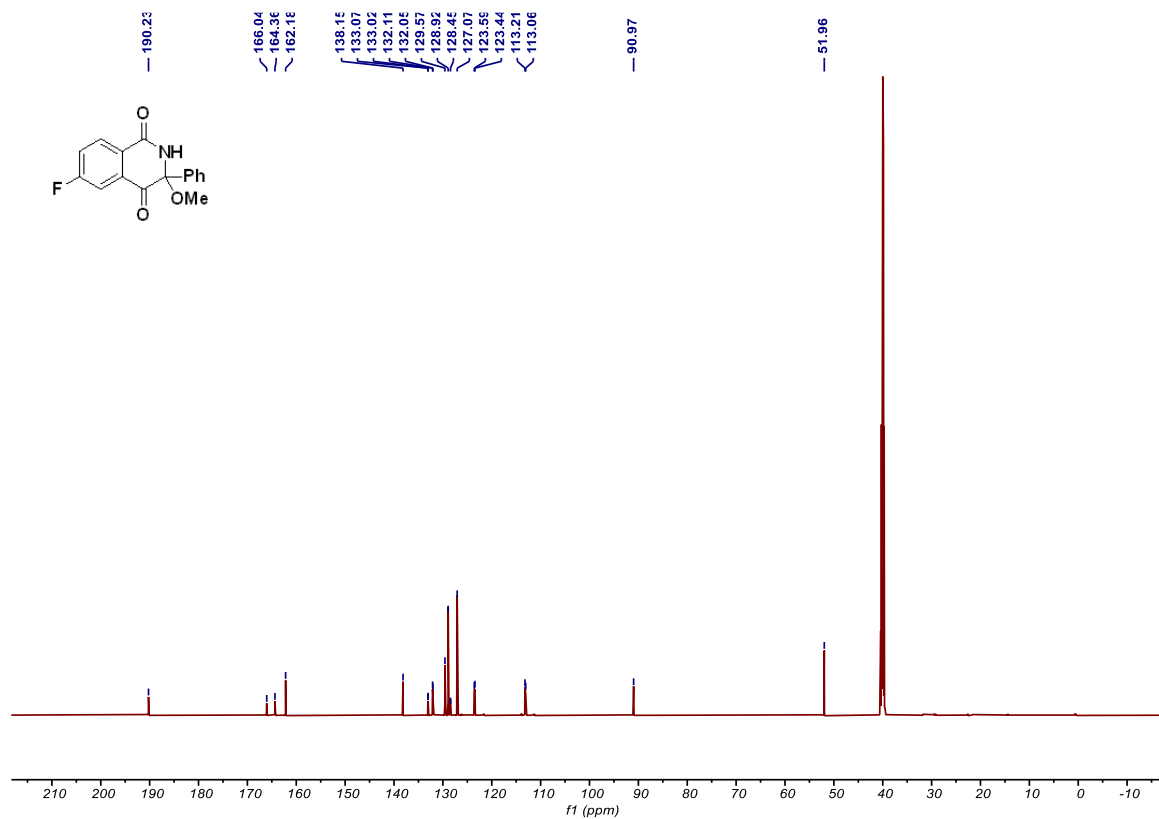

RS13 #3912 RT: 21.88 AV: 1 NL: 4.51E5  
T: FTMS + p ESI Full ms [100.0000-1500.0000]

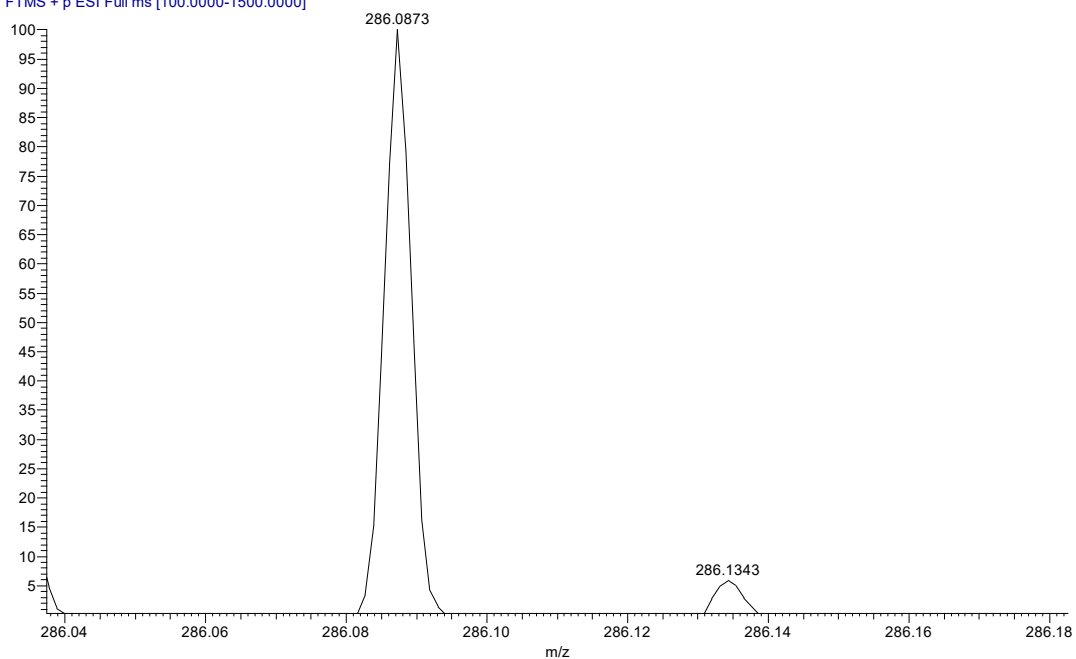

### 6-chloro-3-methoxy-3-phenyl-2,3-dihydroisoquinoline-1,4-dione (8)

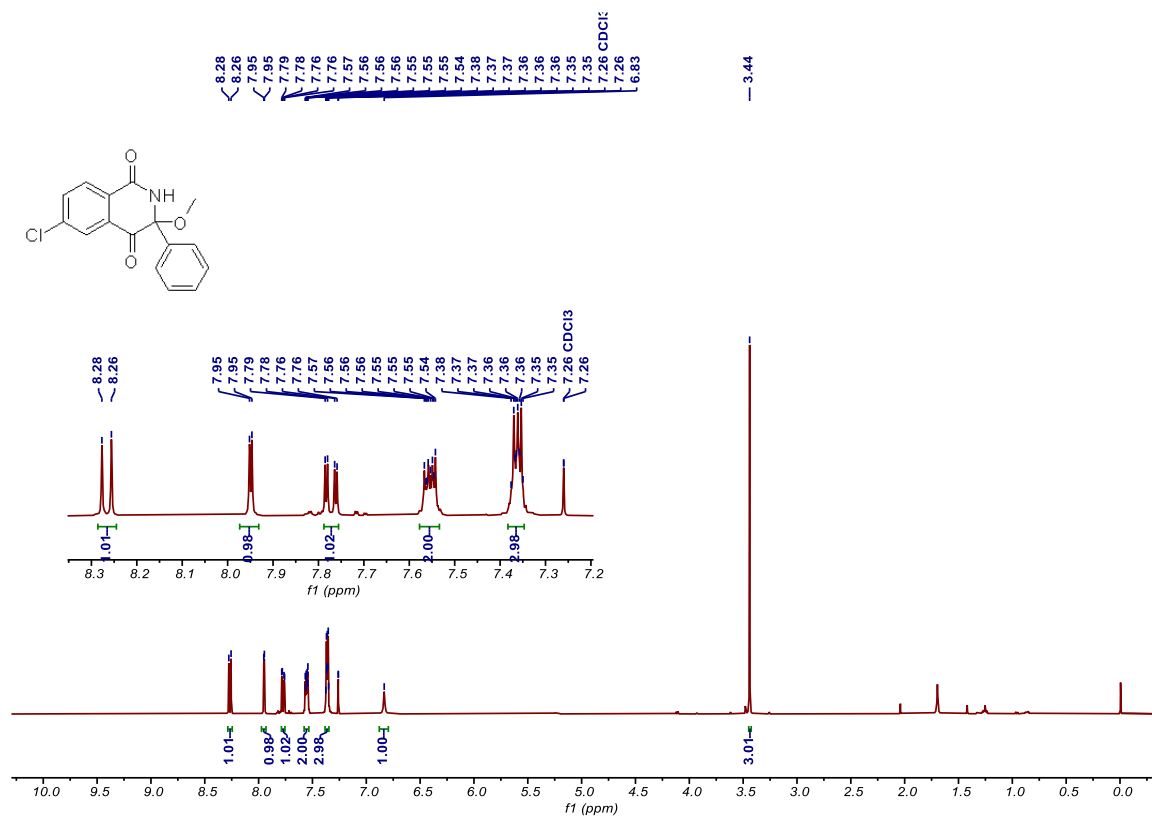

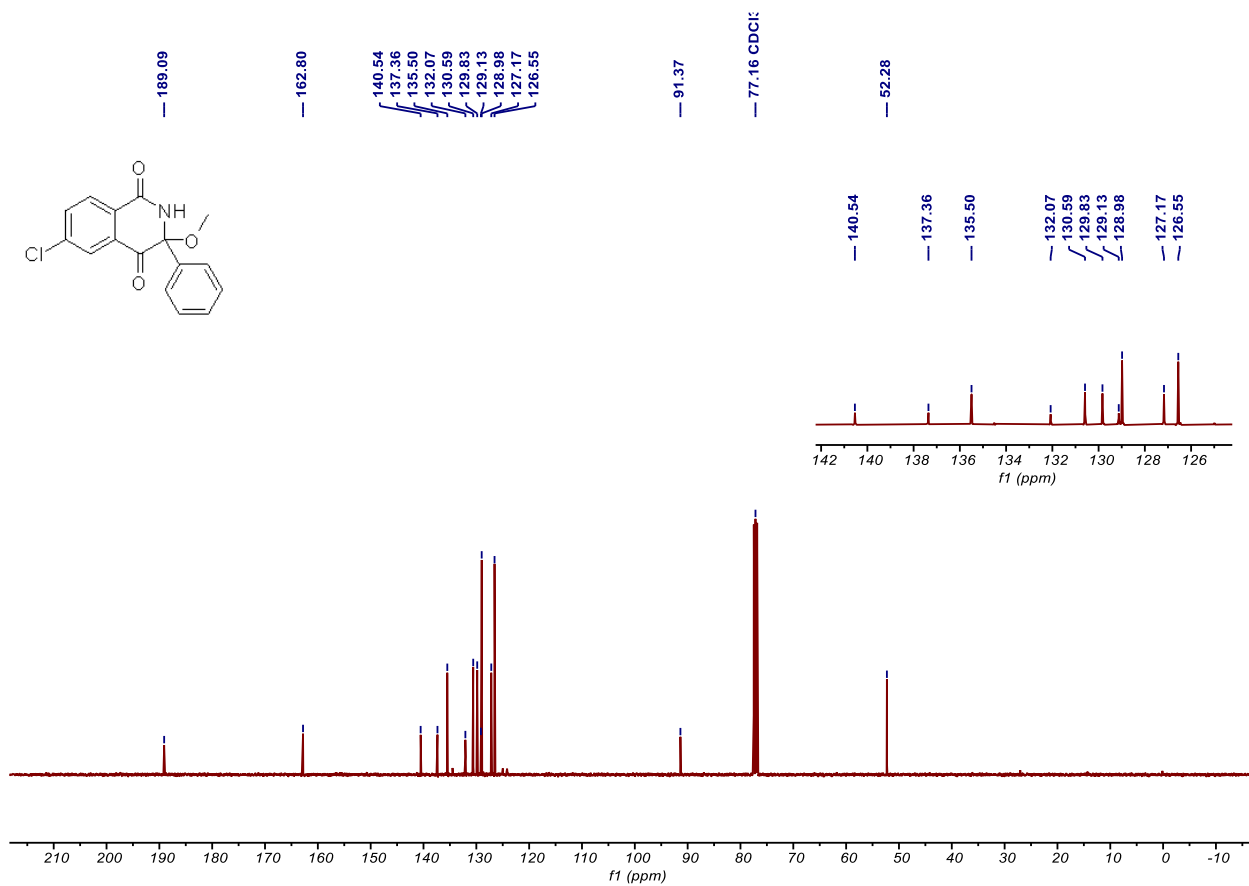

ZTT #81 RT: 0.45 AV: 1 NL: 1.67E4  
T: FTMS + p ESI Full ms [100.0000-1500.0000]

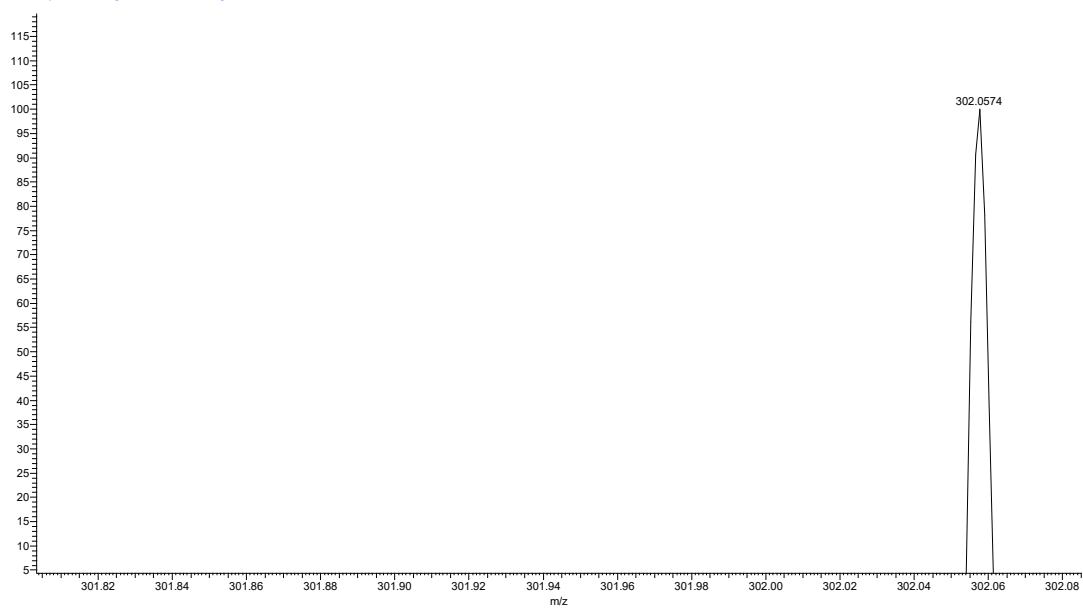



# 6-bromo-3-methoxy-3-phenyl-2,3-dihydroisoquinoline-1,4-dione (9)

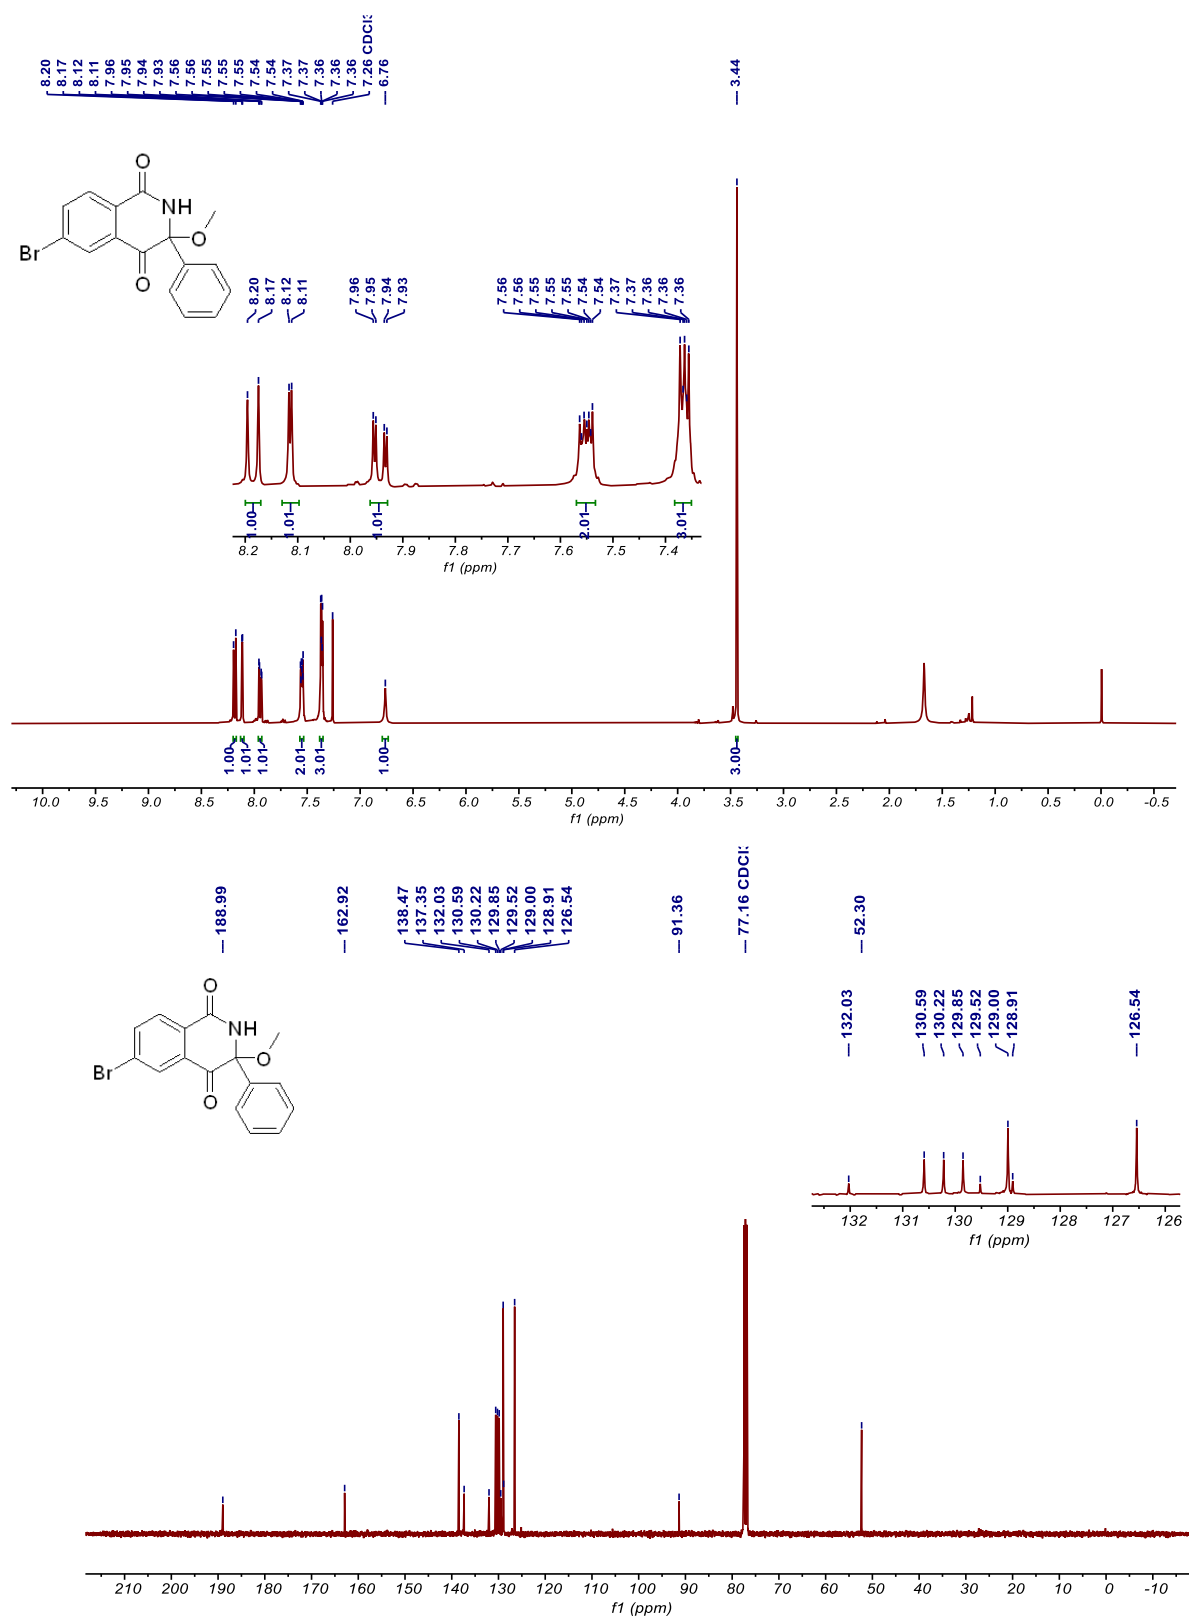

LQY9 #2478 RT: 13.29 AV: 1 NL: 3.57E4  
T: FTMS + p ESI Full ms [100.0000-1500.0000]

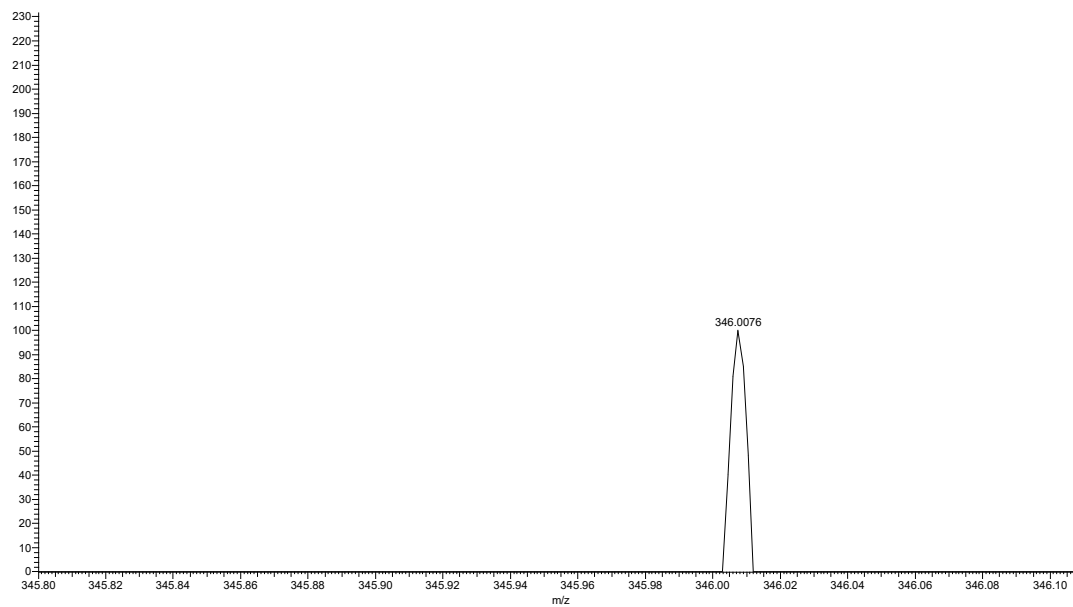

# 6-iodo-3-methoxy-3-phenyl-2,3-dihydroisoquinoline-1,4-dione (10)

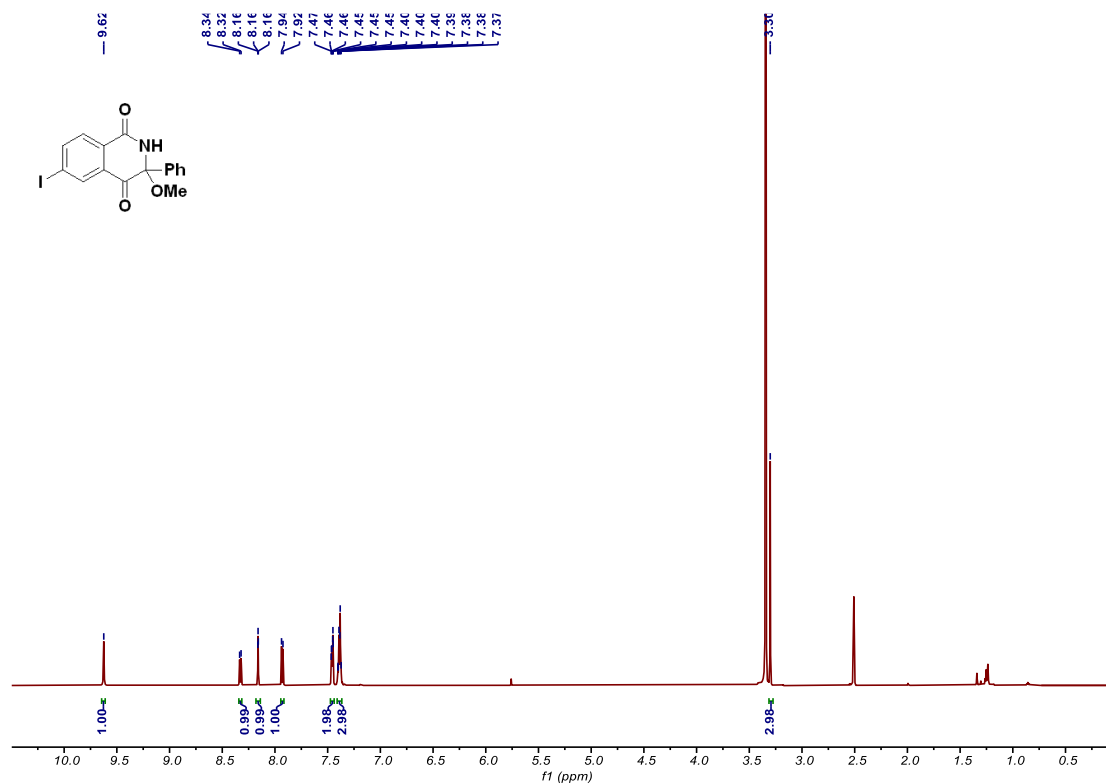

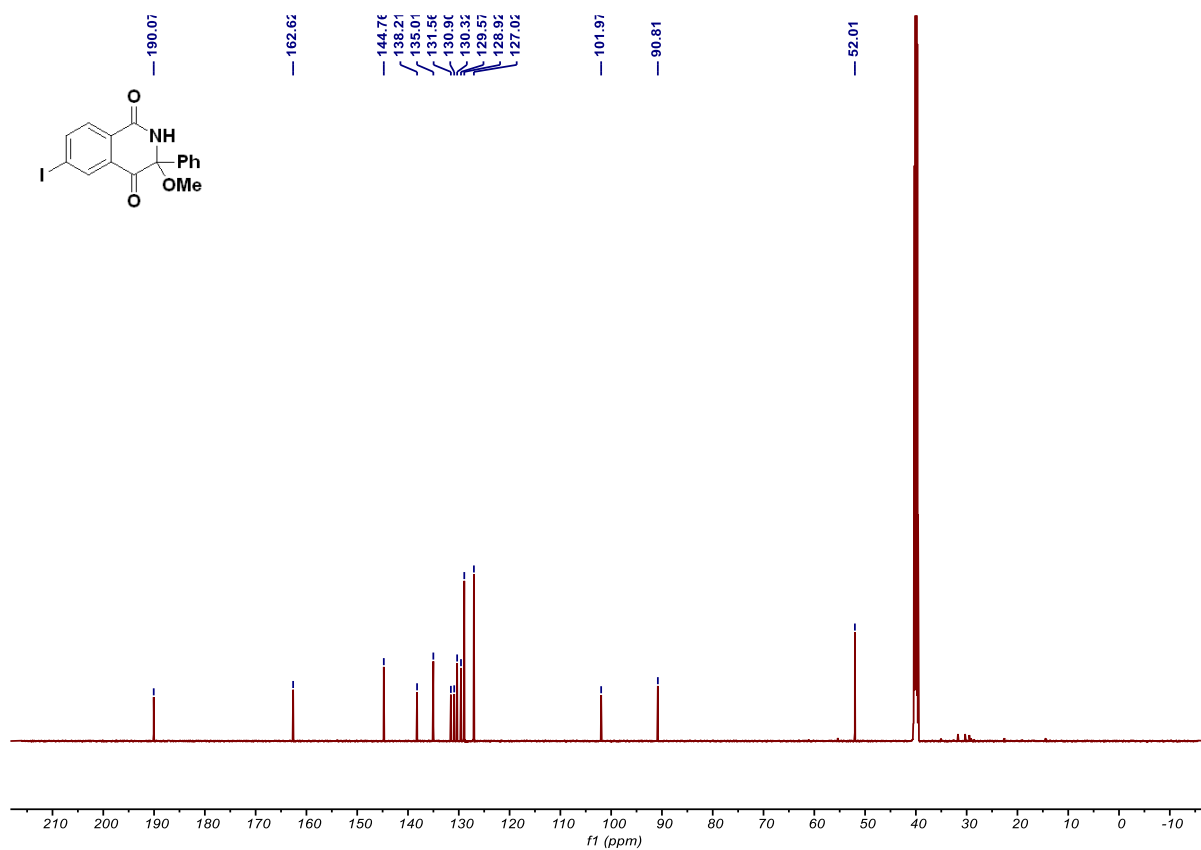

RS13 #3911 RT: 21.87 AV: 1 NL: 5.70E5  
T: FTMS + p ESI Full ms [100.0000-1500.0000]

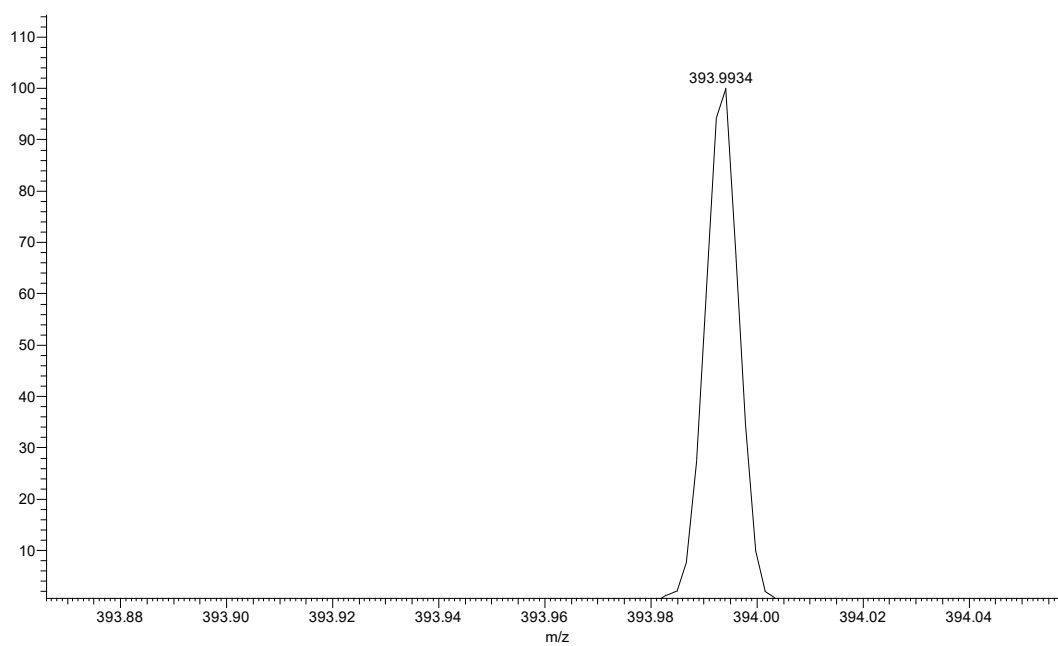

**methyl 3-methoxy-1,4-dioxo-3-phenyl-1,2,3,4-tetrahydroisoquinoline-6-carboxylate (11)**

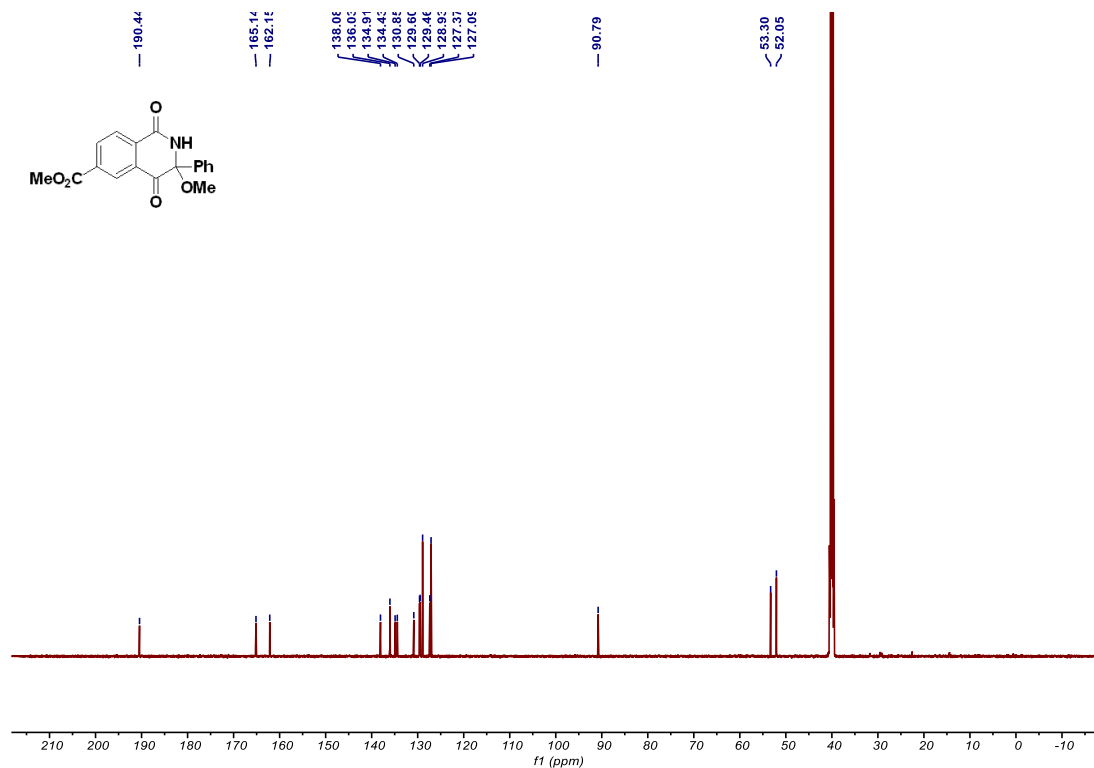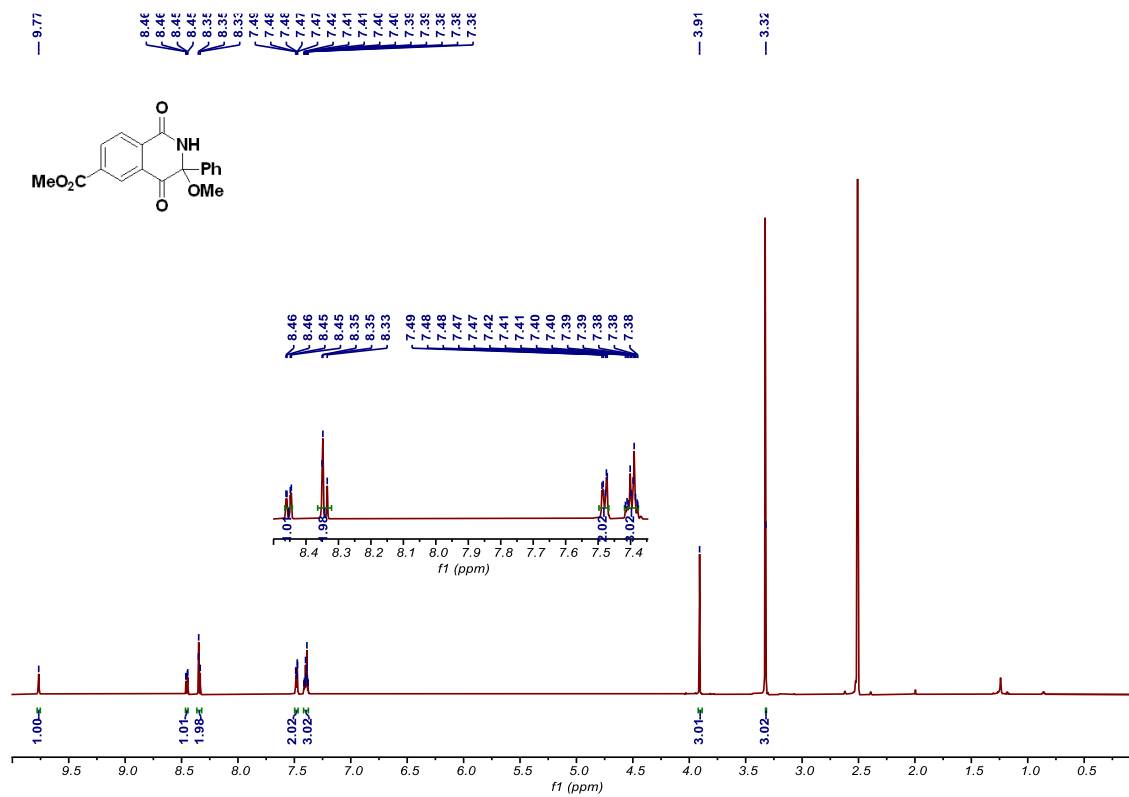

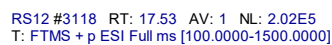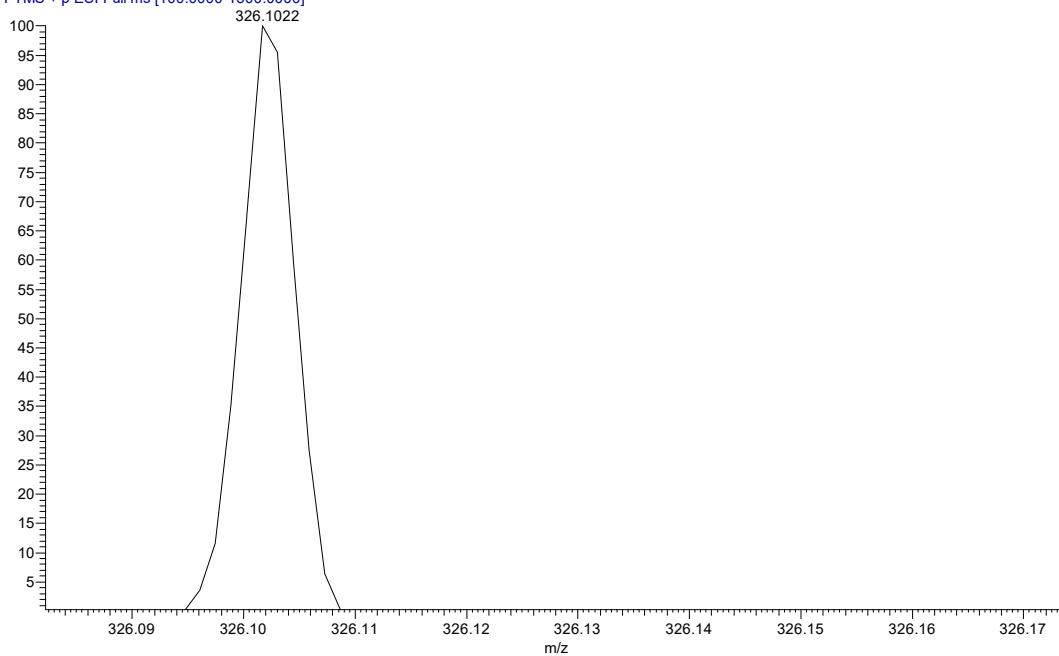

**3-methoxy-3-phenyl-6-(trifluoromethyl)-2,3-dihydroisoquinoline-1,4-dione (12)**

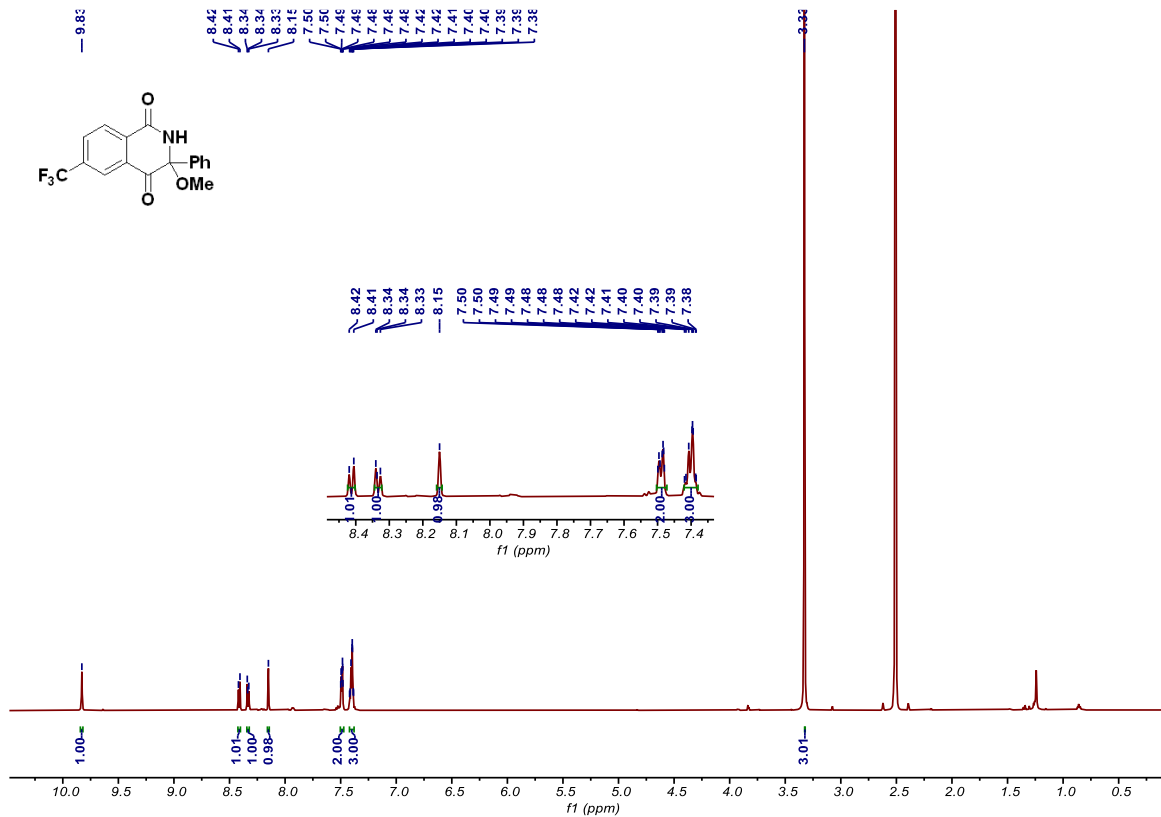

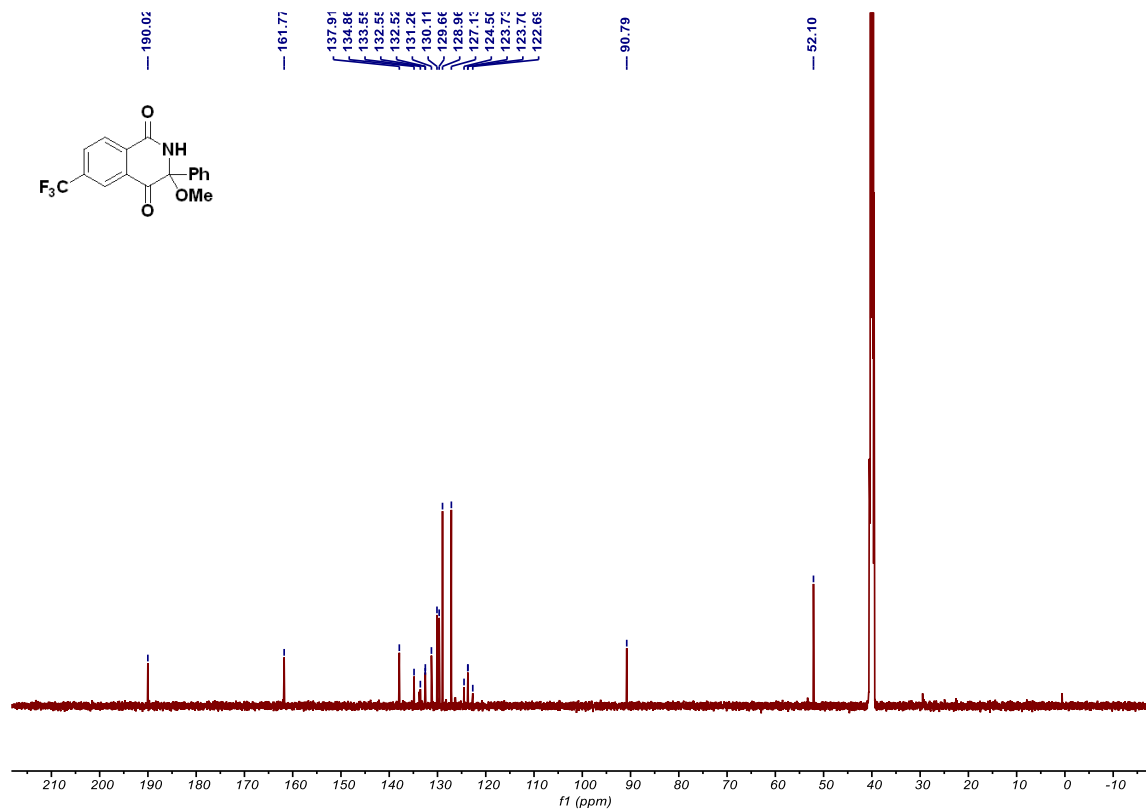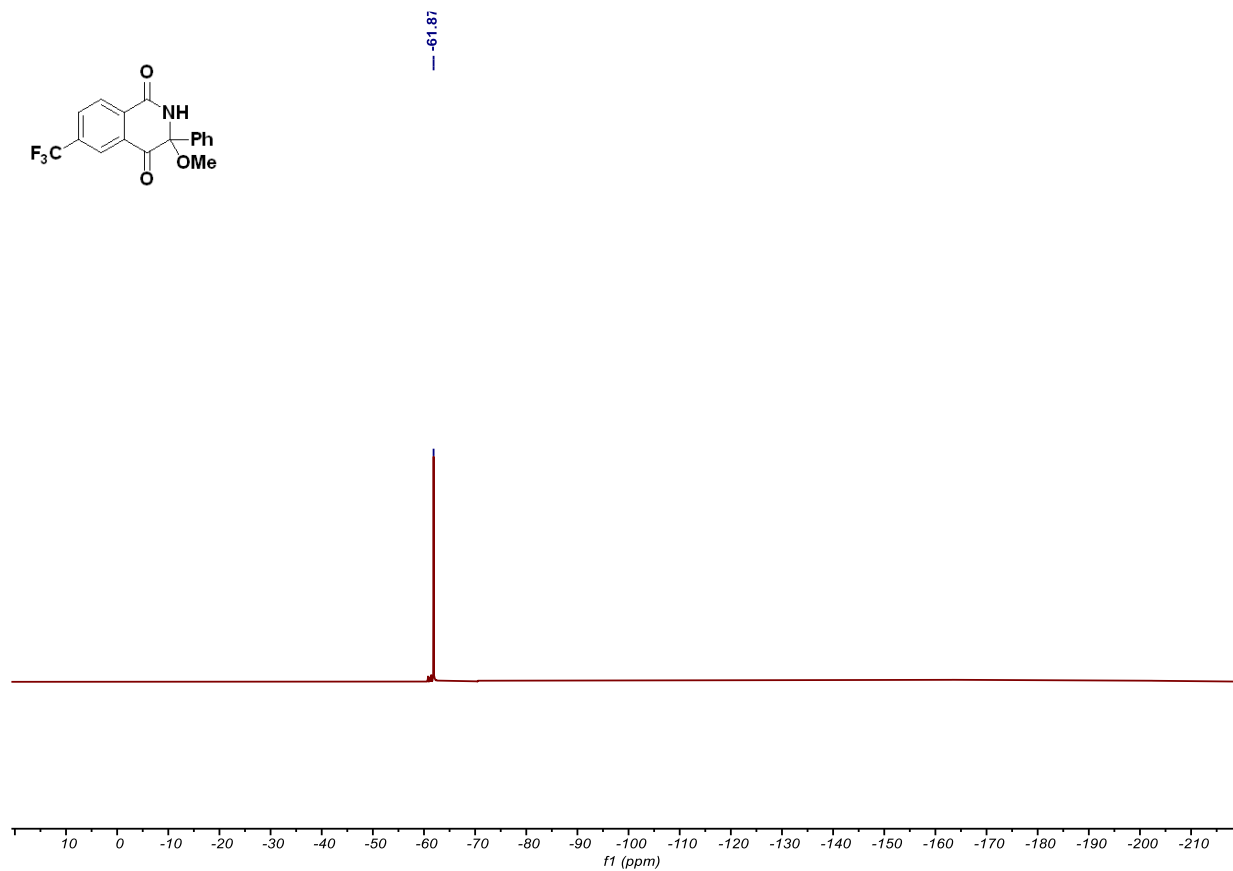

RS13 #3430 RT: 19.31 AV: 1 NL: 2.36E5  
T: FTMS + p ESI Full ms [100.0000-1500.0000]

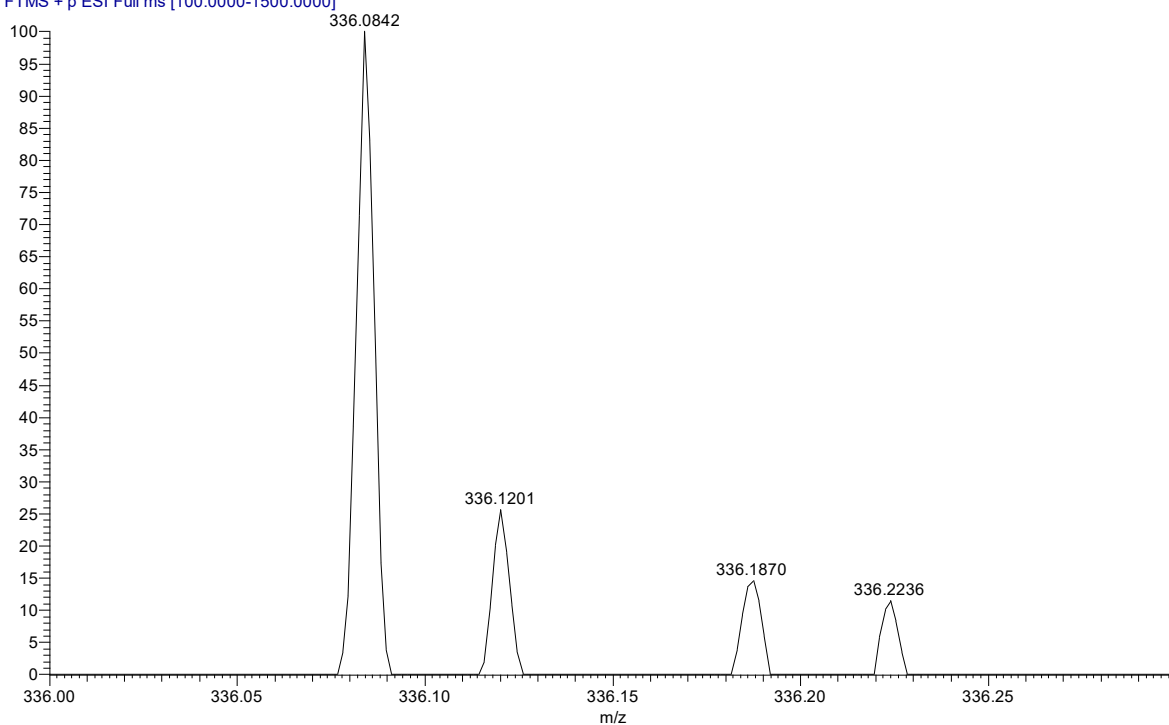

### 3-methoxy-3-phenyl-6-(trifluoromethoxy)-2,3-dihydroisoquinoline-1,4-dione (13)

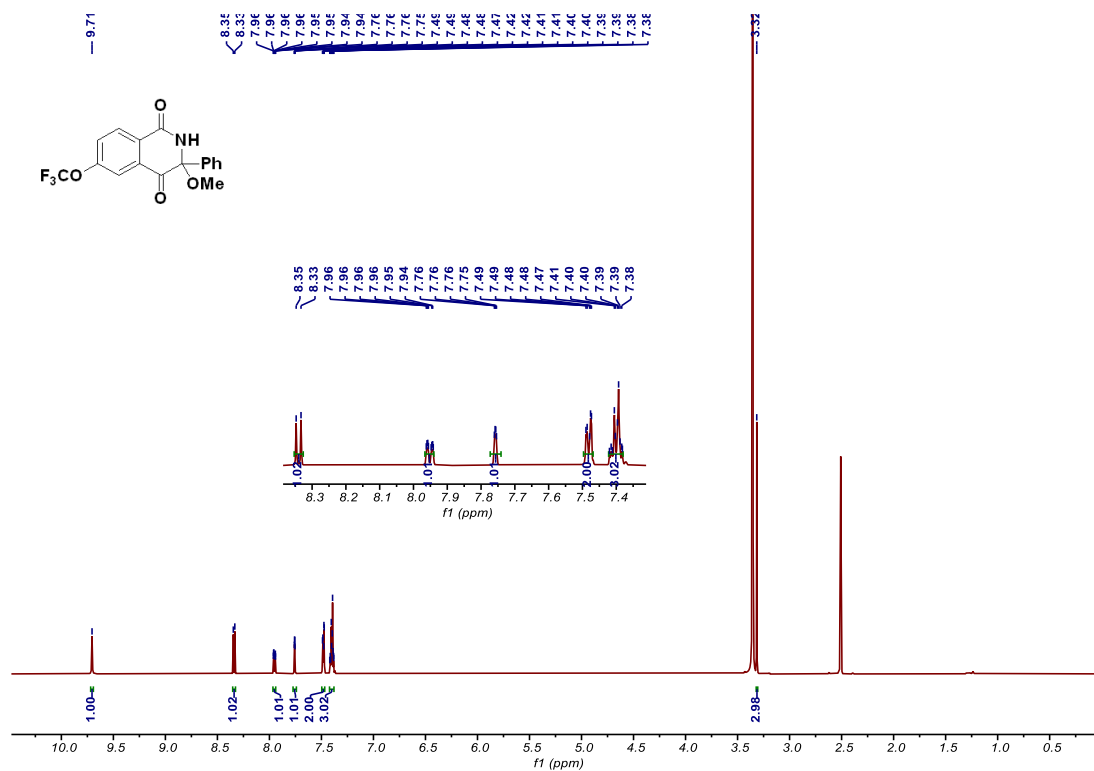

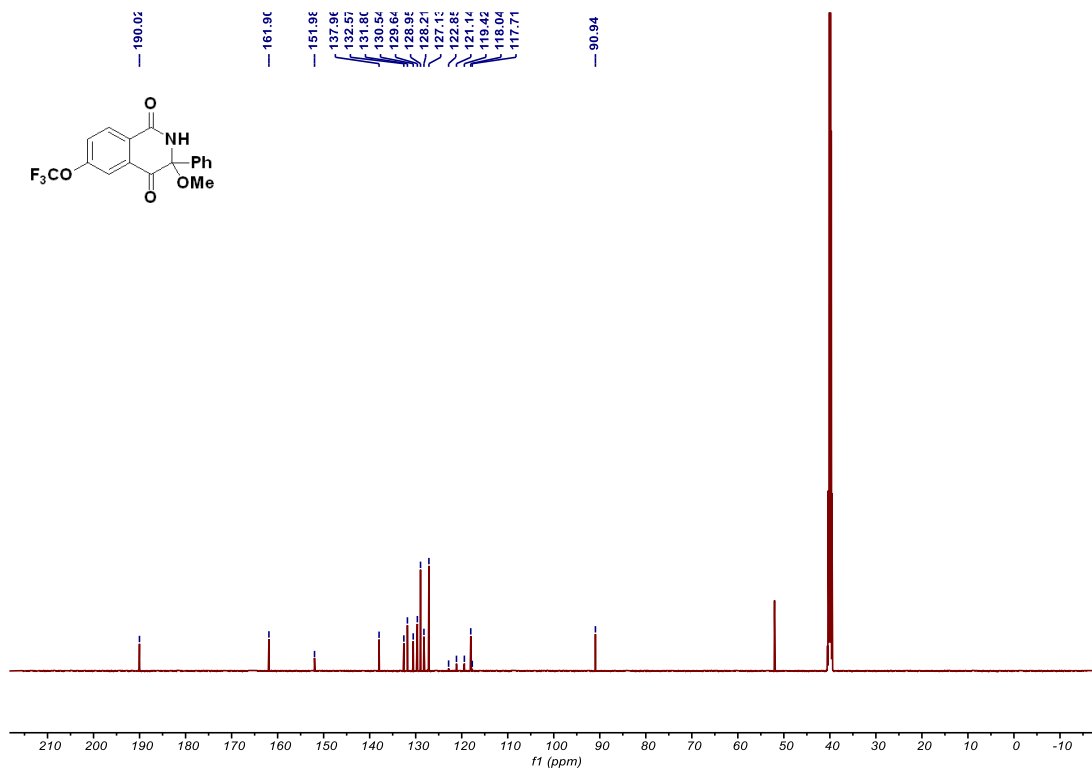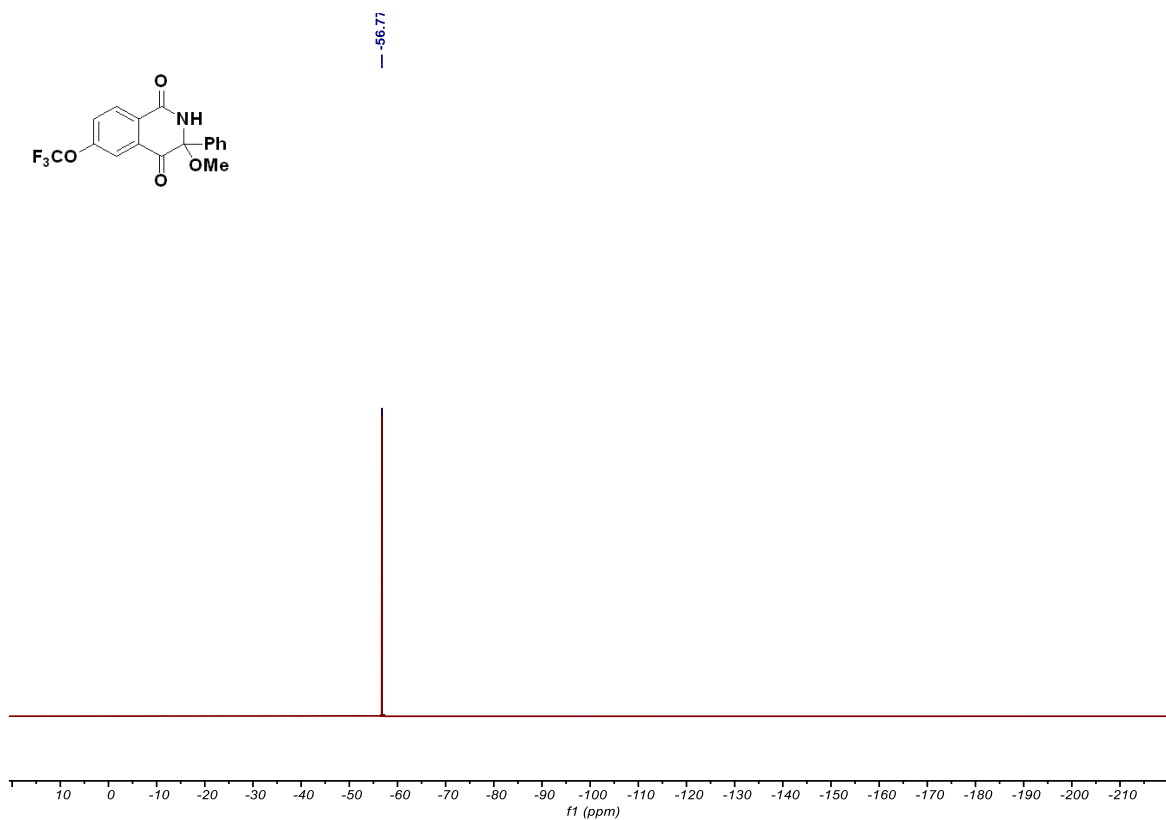



RS11 #3668 RT: 20.56 AV: 1 NL: 2.23E5  
T: FTMS + p ESI Full ms [100.0000-1500.0000]

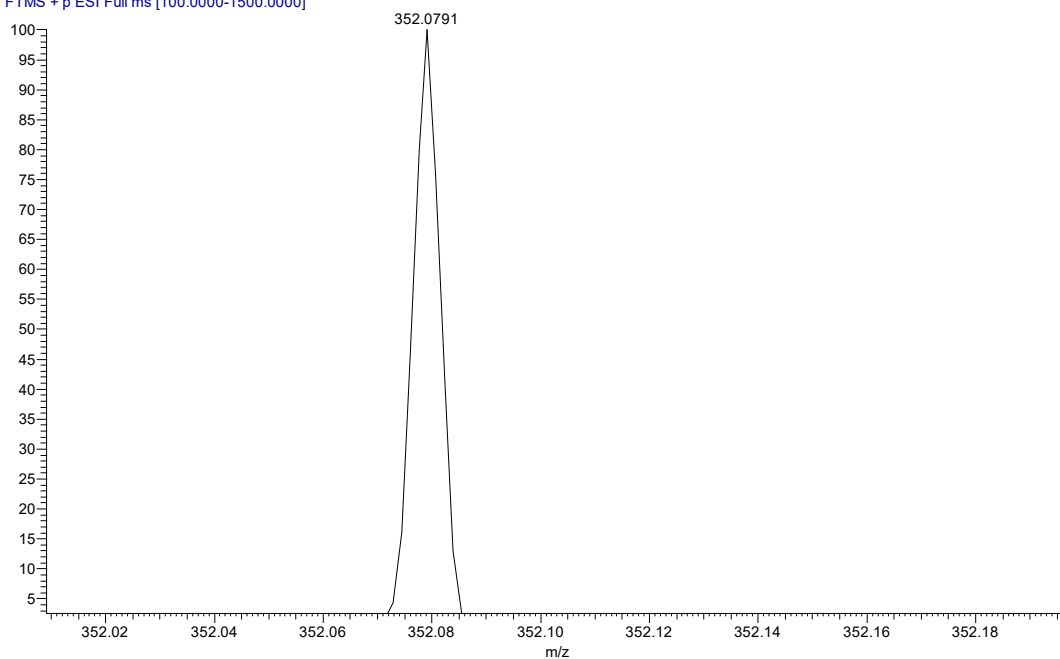

### 3-methoxy-1,4-dioxo-3-phenyl-1,2,3,4-tetrahydroisoquinoline-6-carbonitrile (14)

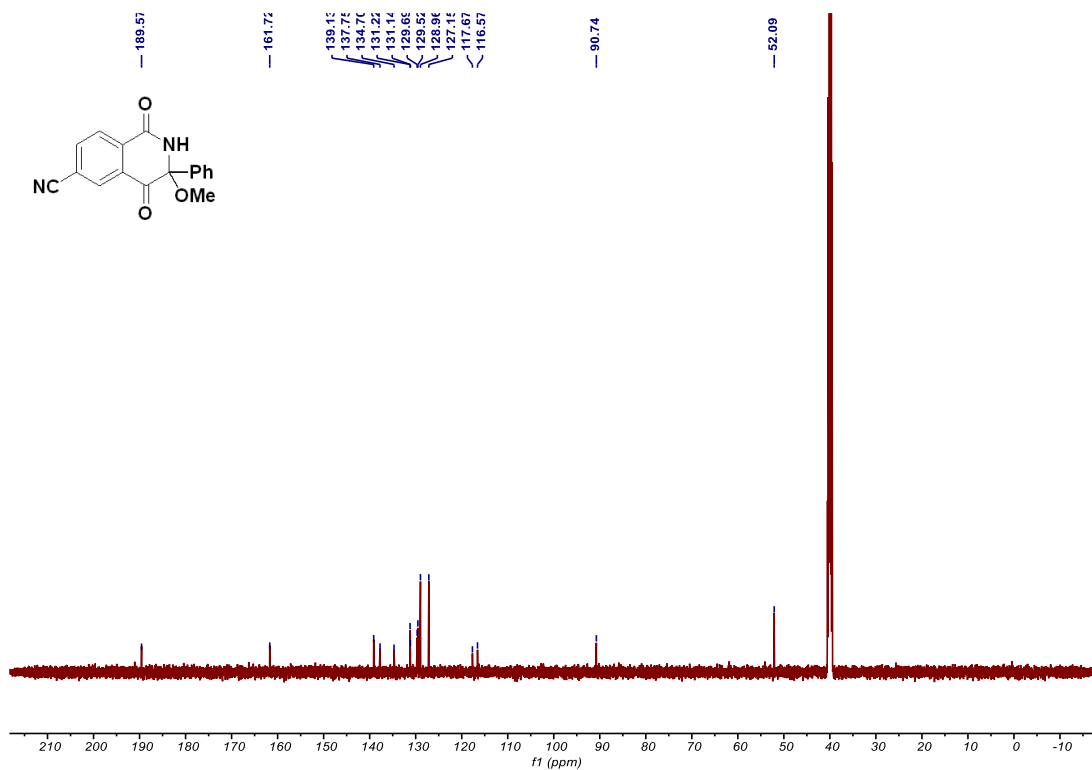

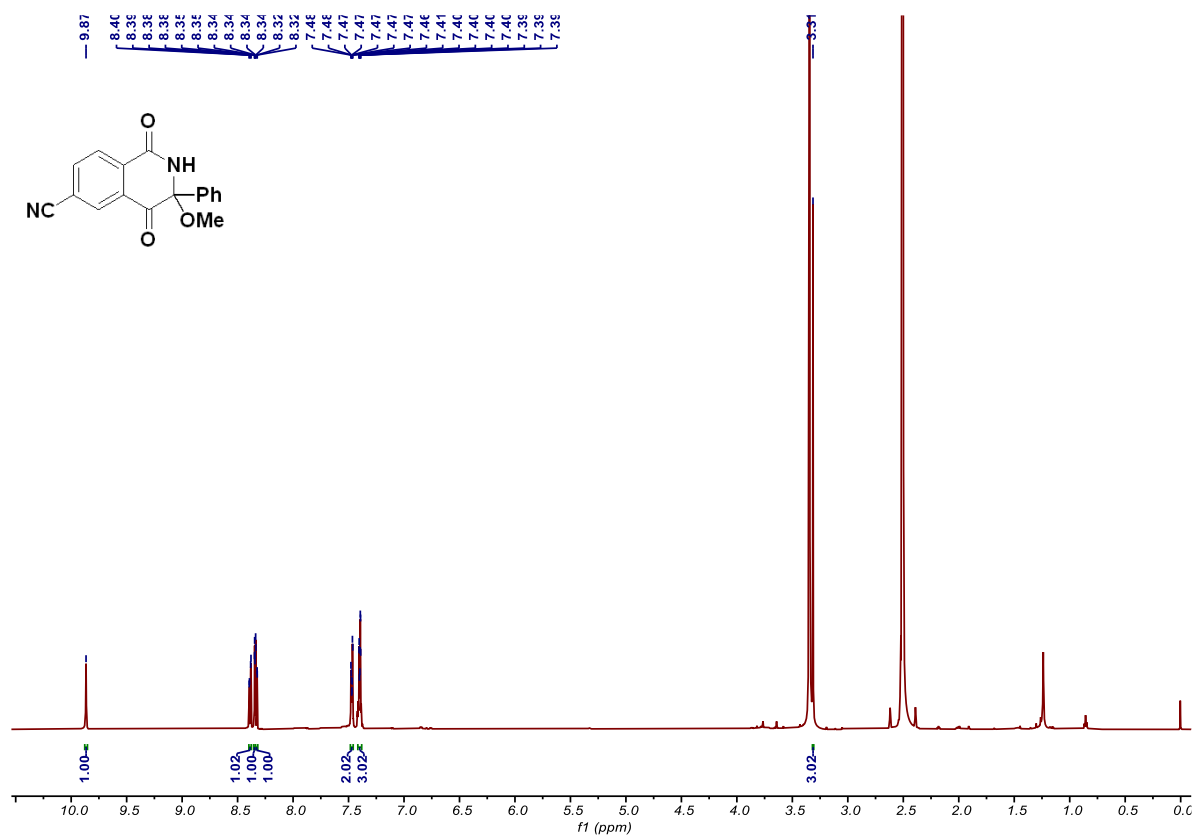

RS11 #3028 RT: 17.08 AV: 1 NL: 1.47E6  
T: FTMS + p ESI Full ms [100.0000-1500.0000]

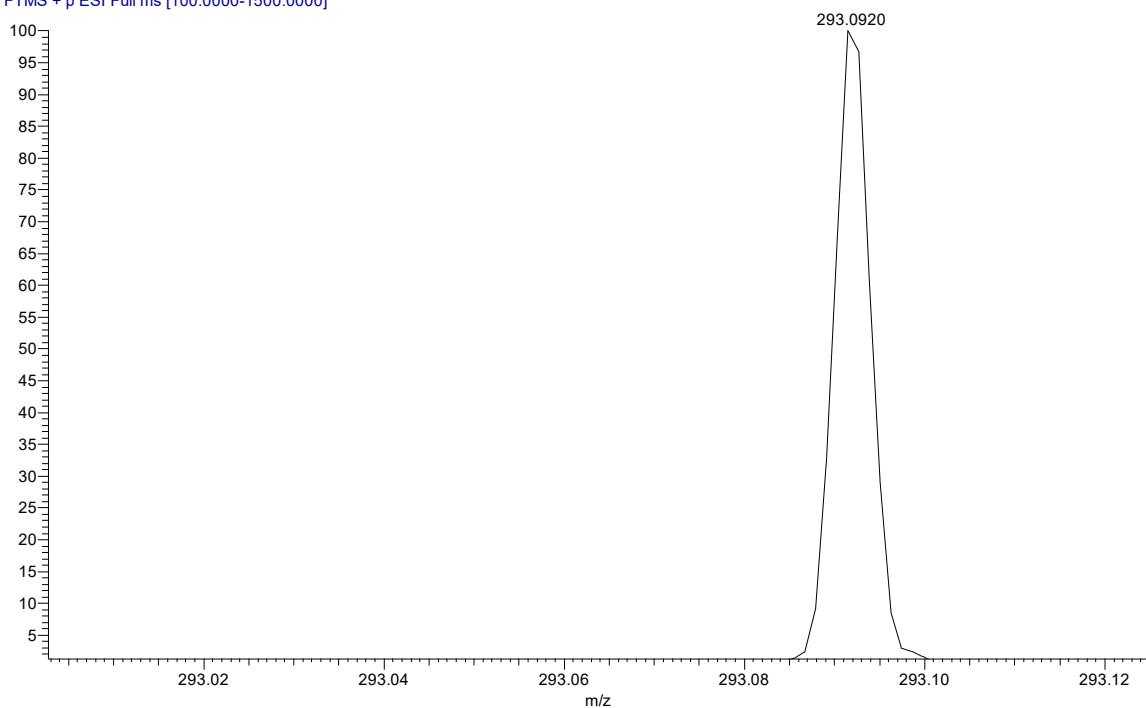

### 3-methoxy-6-nitro-3-phenyl-2,3-dihydroisoquinoline-1,4-dione (15)

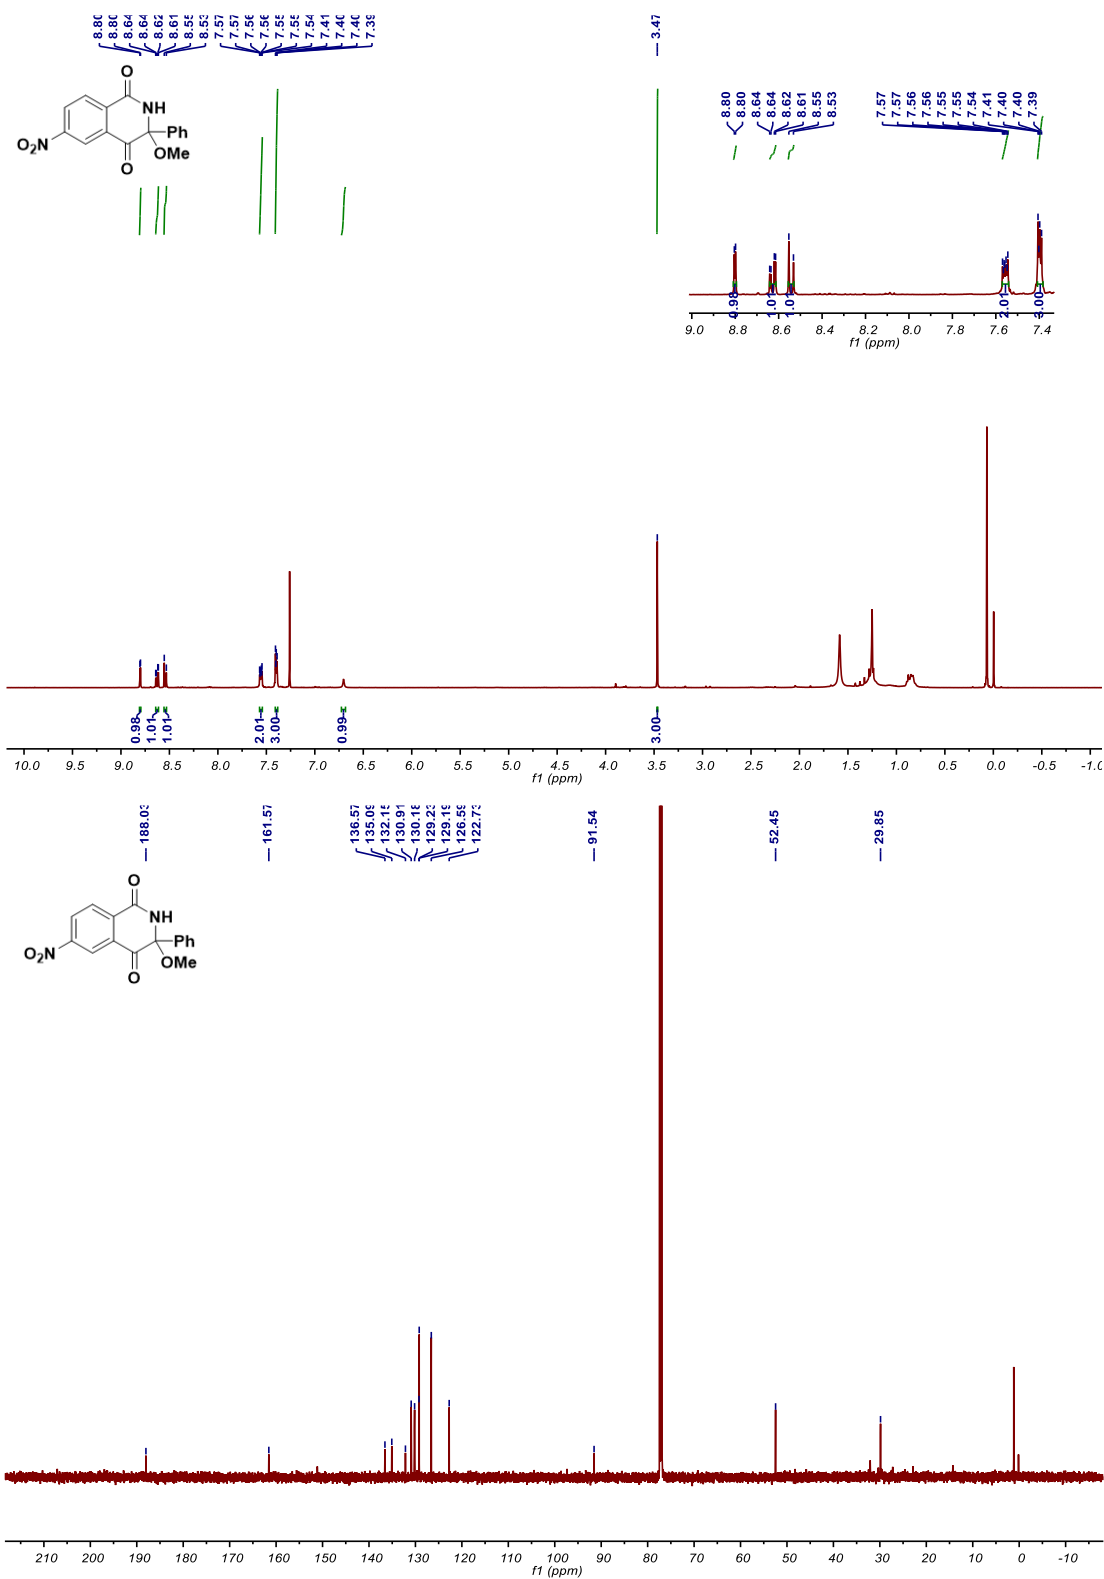

RS13 #3345 RT: 18.85 AV: 1 NL: 2.58E6  
T: FTMS + p ESI Full ms [100.0000-1500.0000]

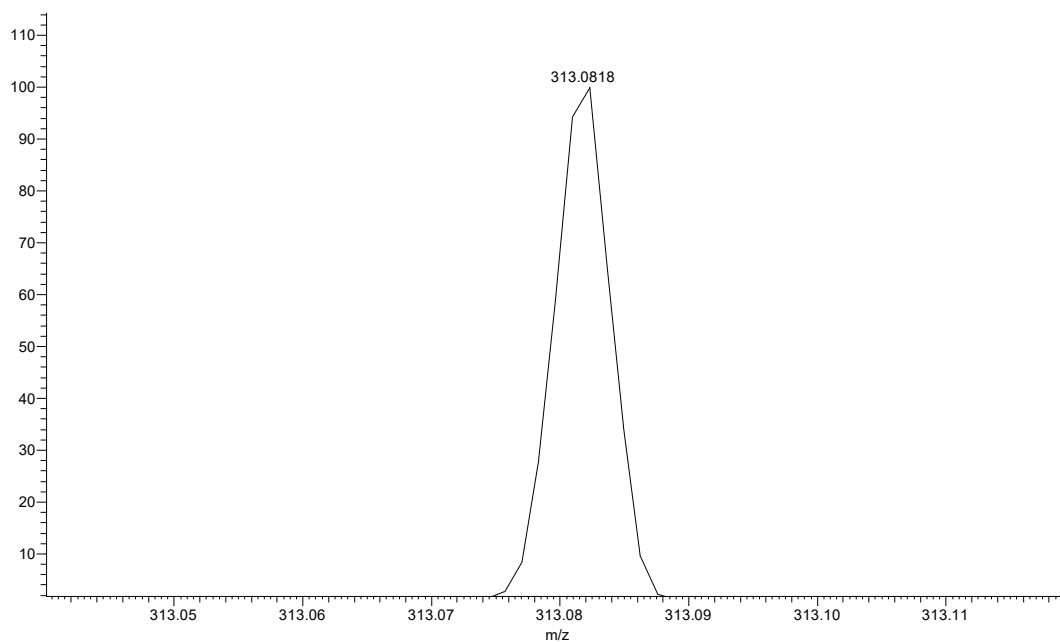

### 3-methoxy-5,7-dimethyl-3-phenyl-2,3-dihydroisoquinoline-1,4-dione (16)

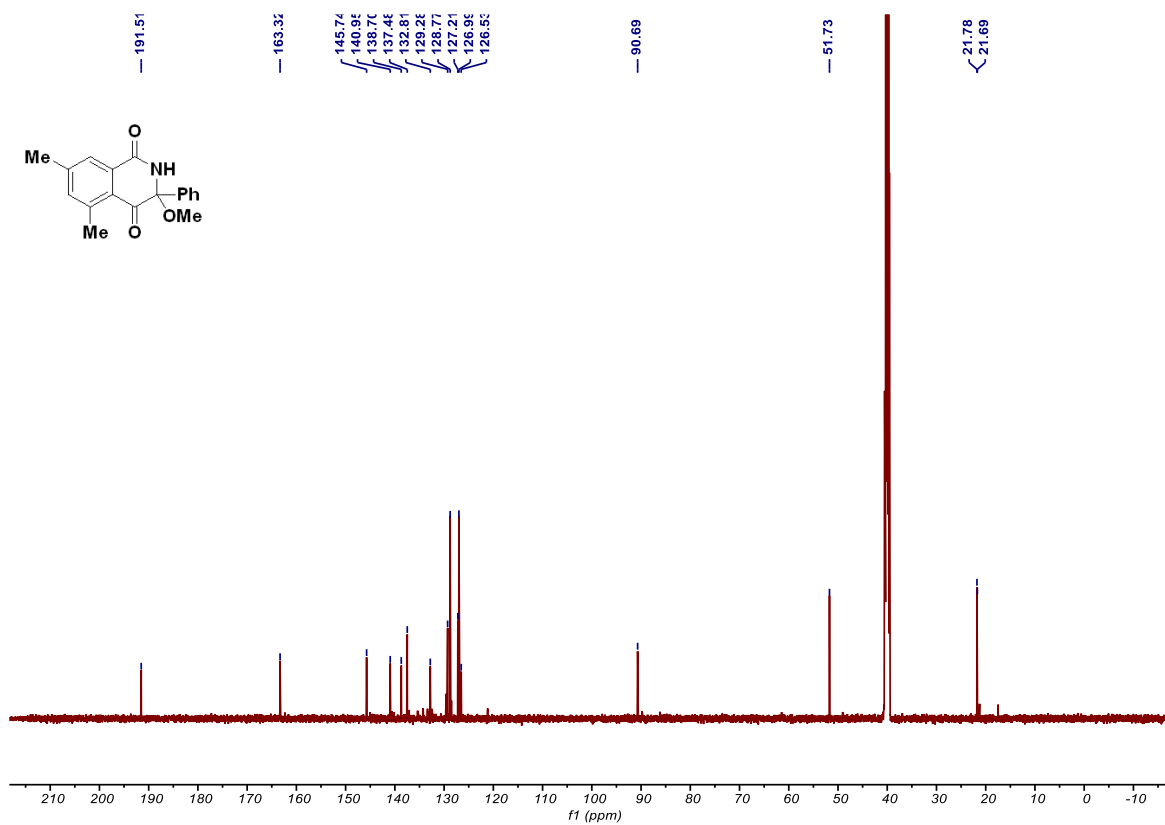

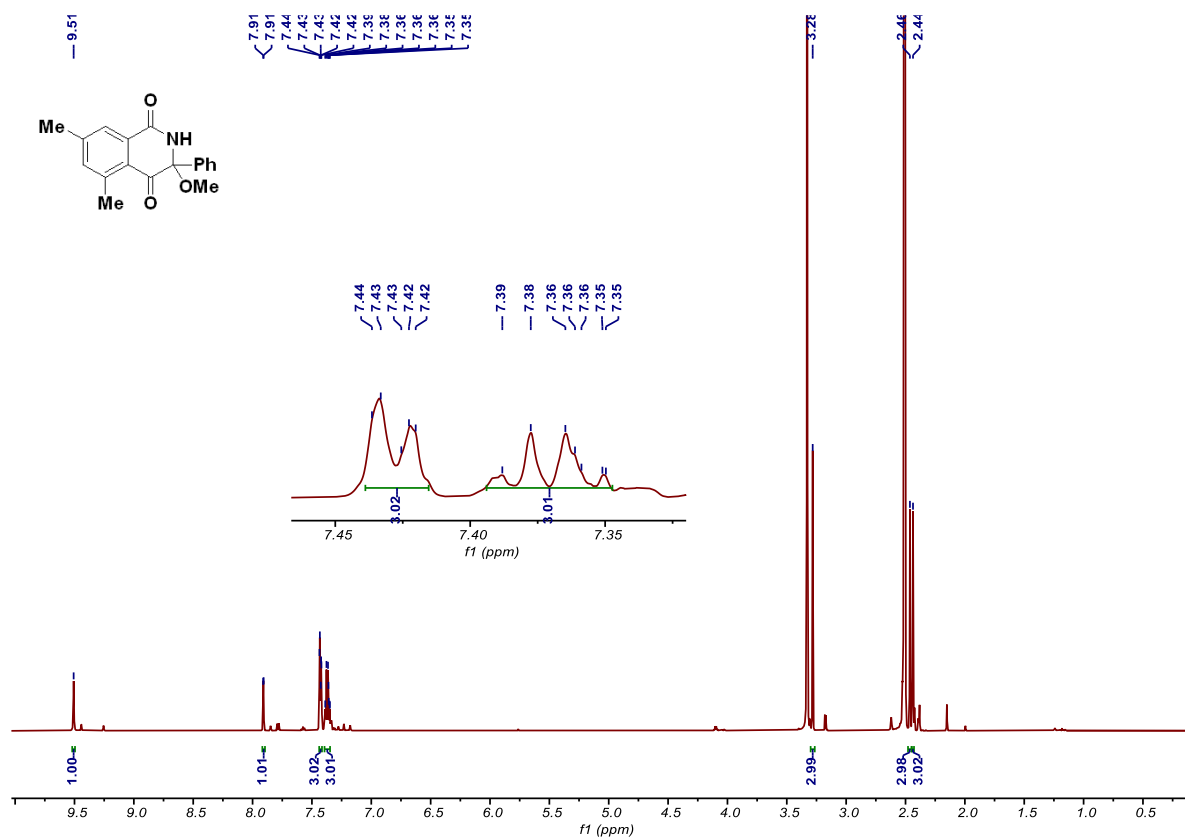

RS11 #3566 RT: 20.00 AV: 1 NL: 2.66E7  
T: FTMS + p ESI Full ms [100.0000-1500.0000]

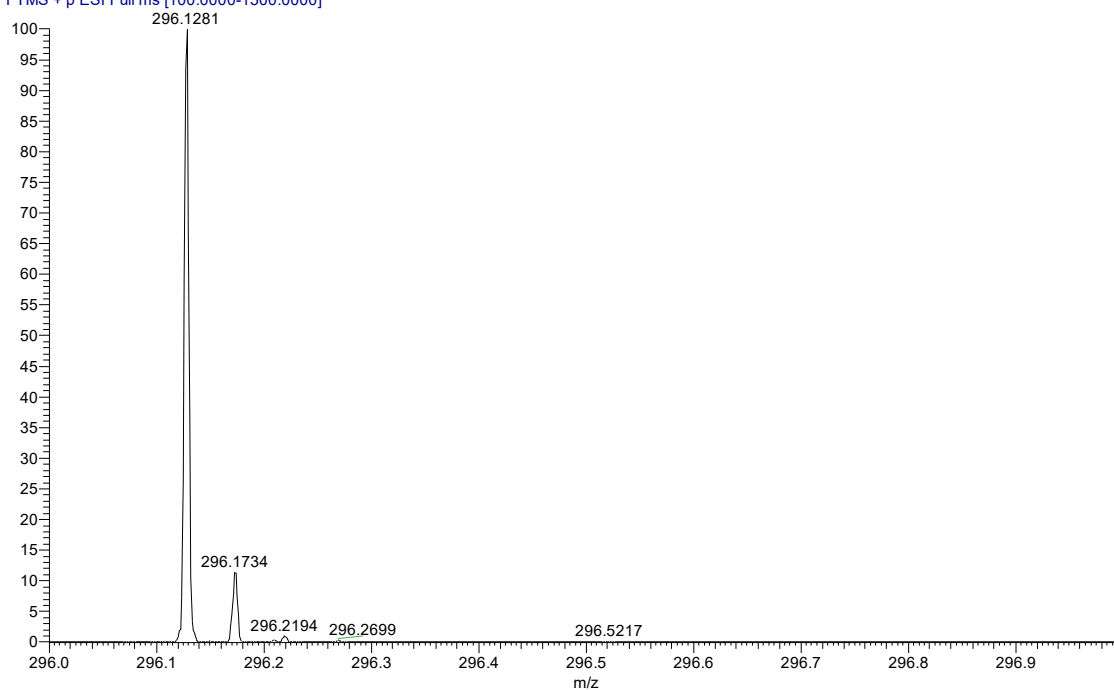

# 5,7-difluoro-3-methoxy-3-phenyl-2,3-dihydroisoquinoline-1,4-dione (17)

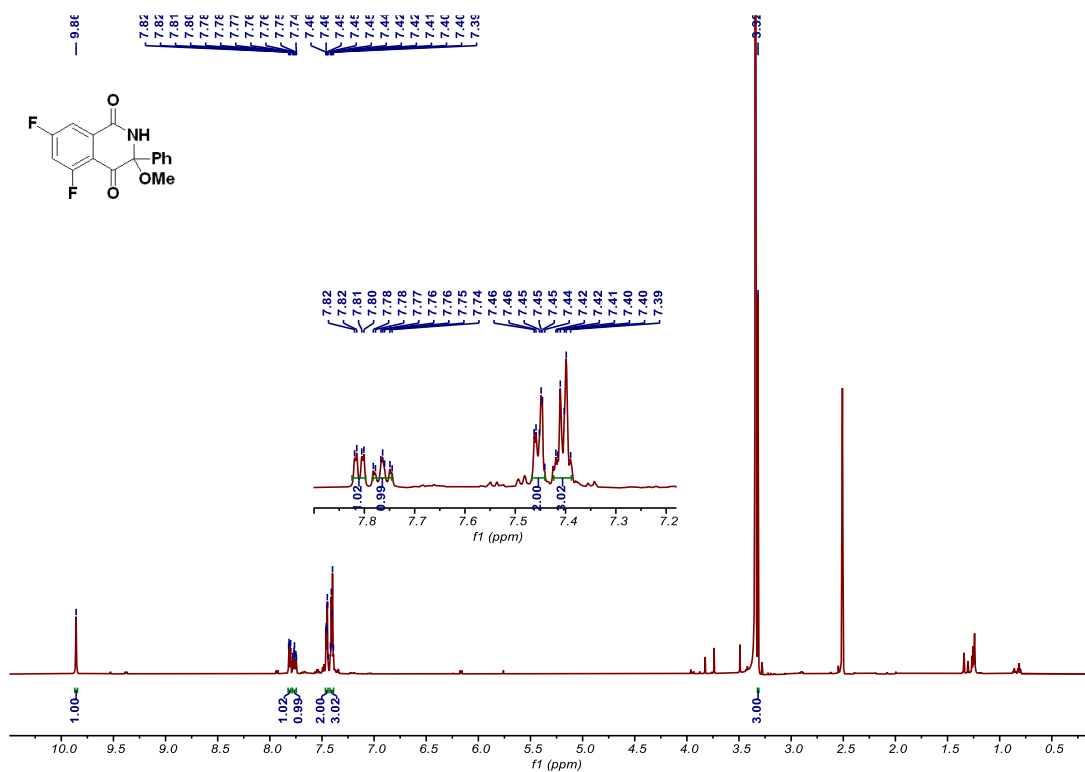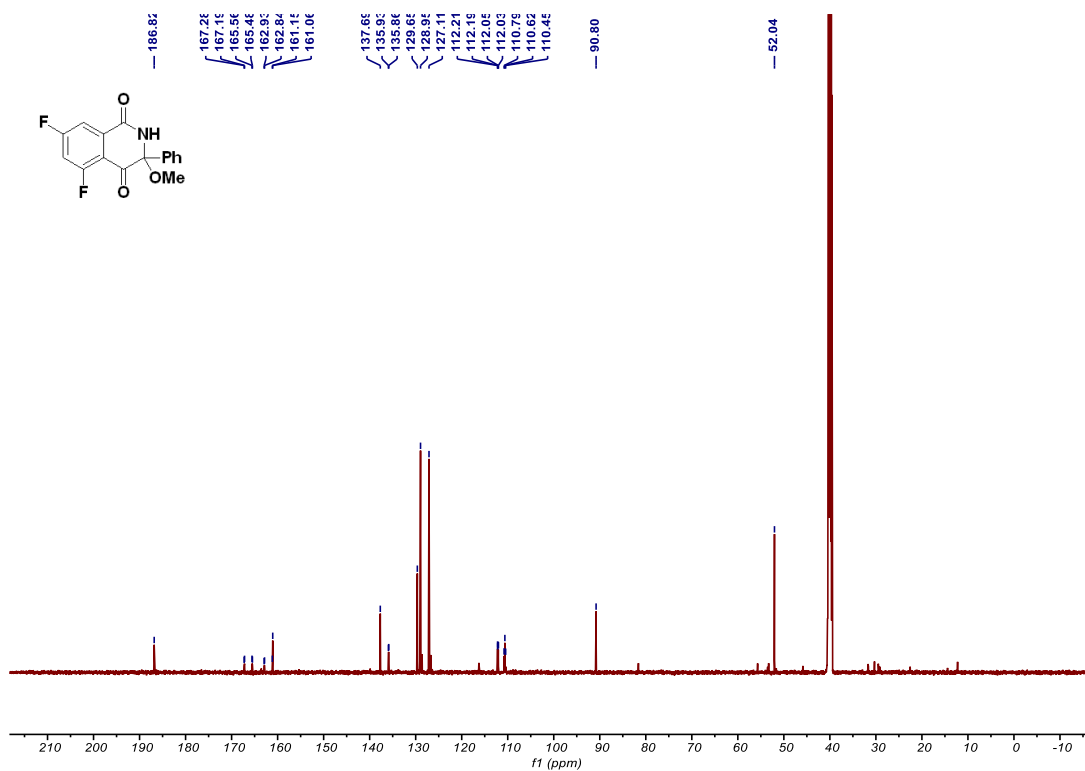

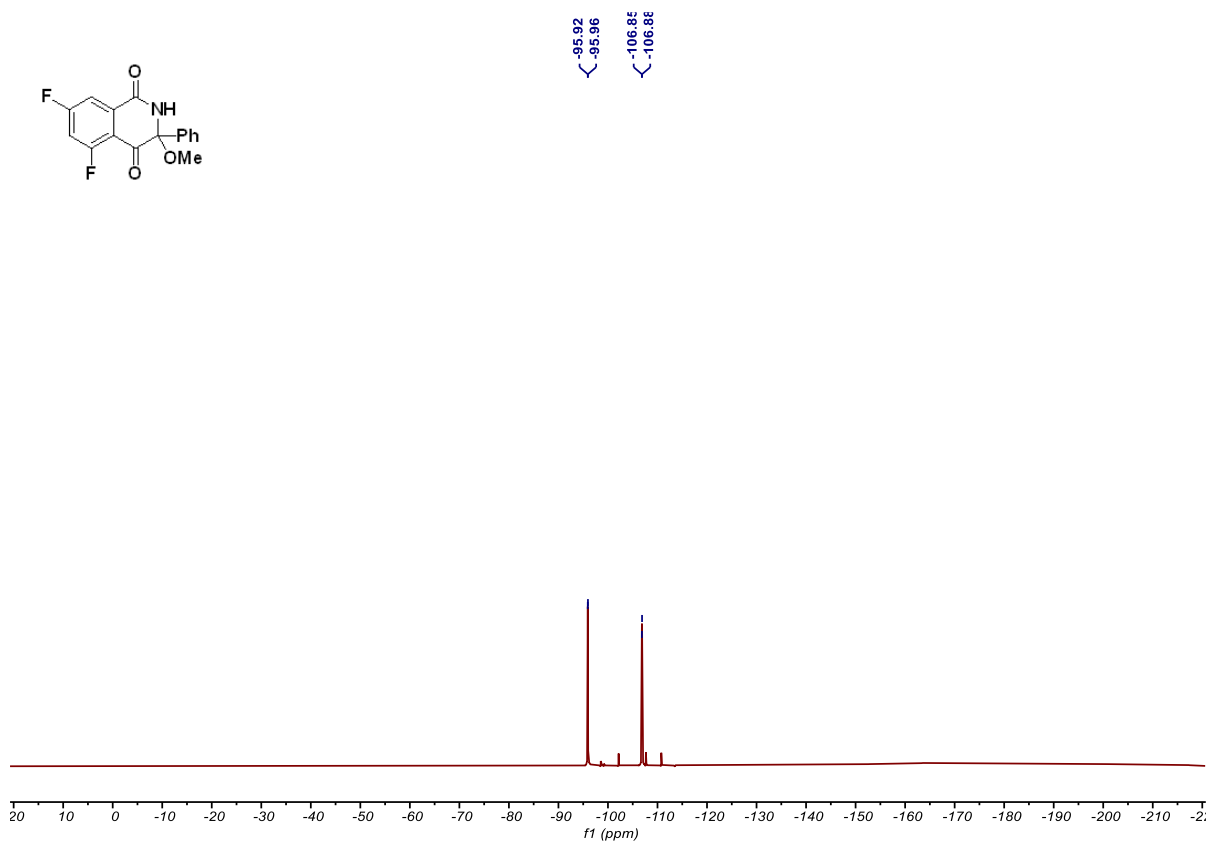

RS13 #3025 RT: 17.12 AV: 1 NL: 9.79E5  
T: FTMS + p ESI Full ms [100.0000-1500.0000]

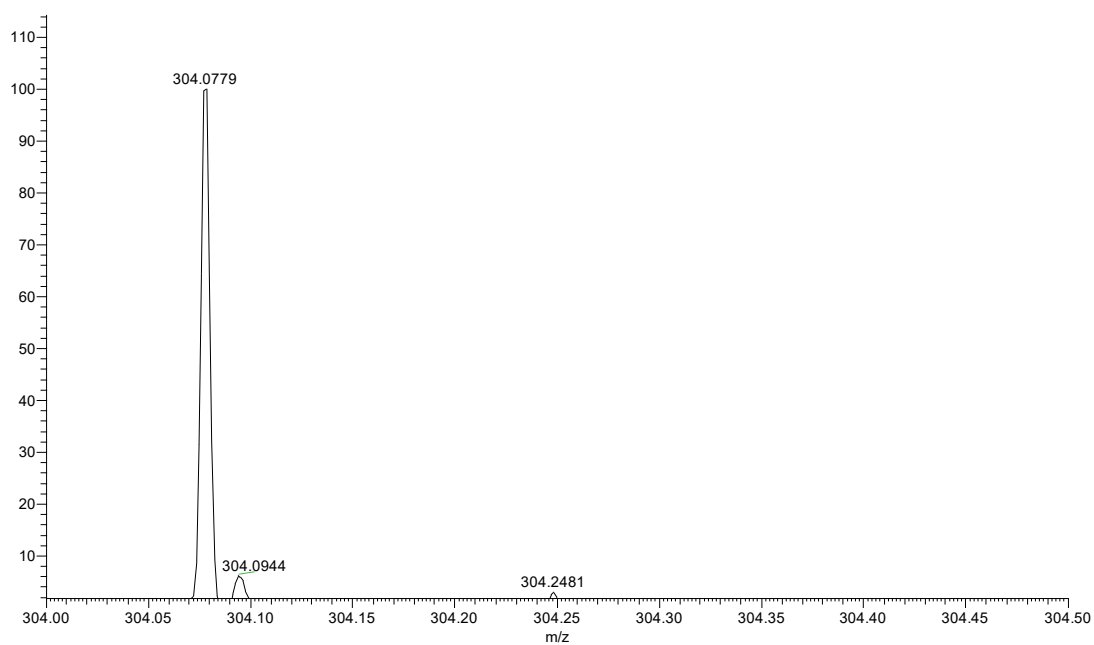

### 3-methoxy-3-phenyl-2,3-dihydrobenzo[g]isoquinoline-1,4-dione (18)

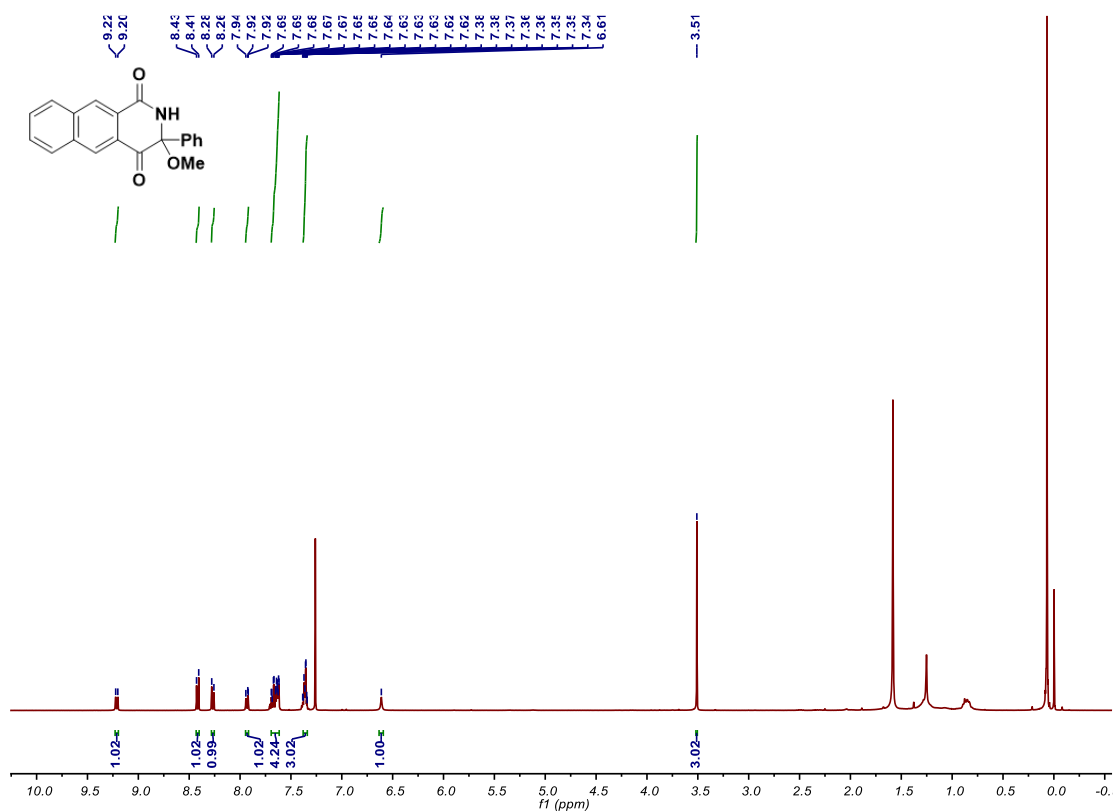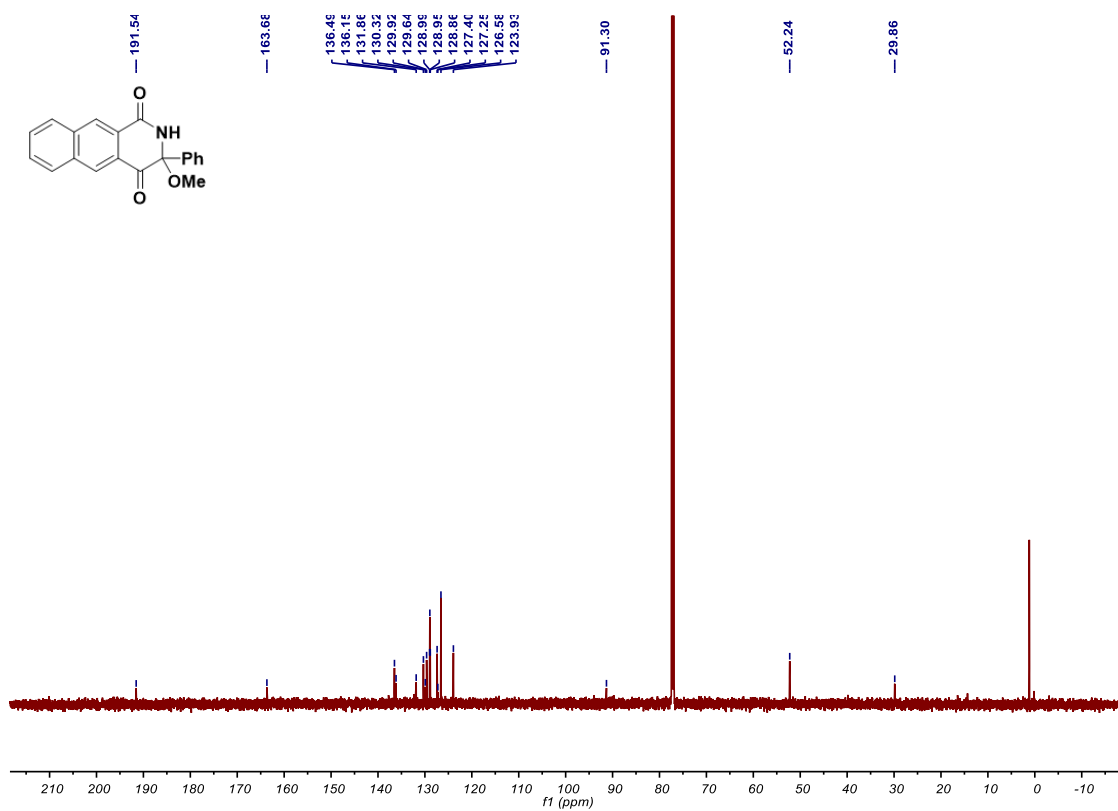



RS11 #3284 RT: 18.48 AV: 1 NL: 2.41E4  
T: FTMS + p ESI Full ms [100.0000-1500.0000]

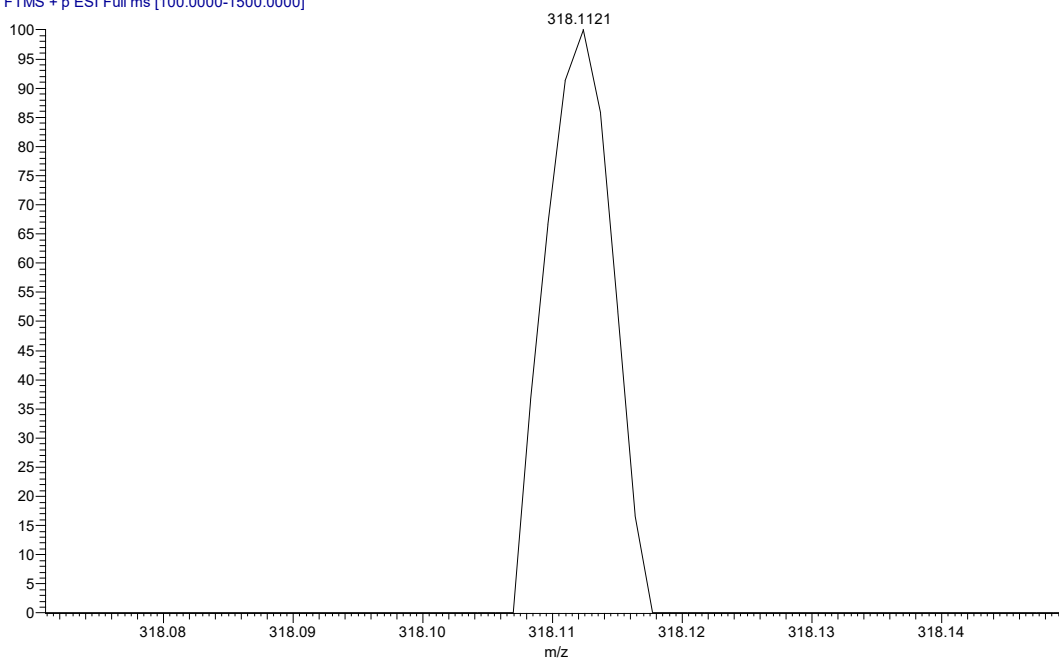

### 3-methoxy-3-(p-tolyl)-2,3-dihydroisoquinoline-1,4-dione (20)

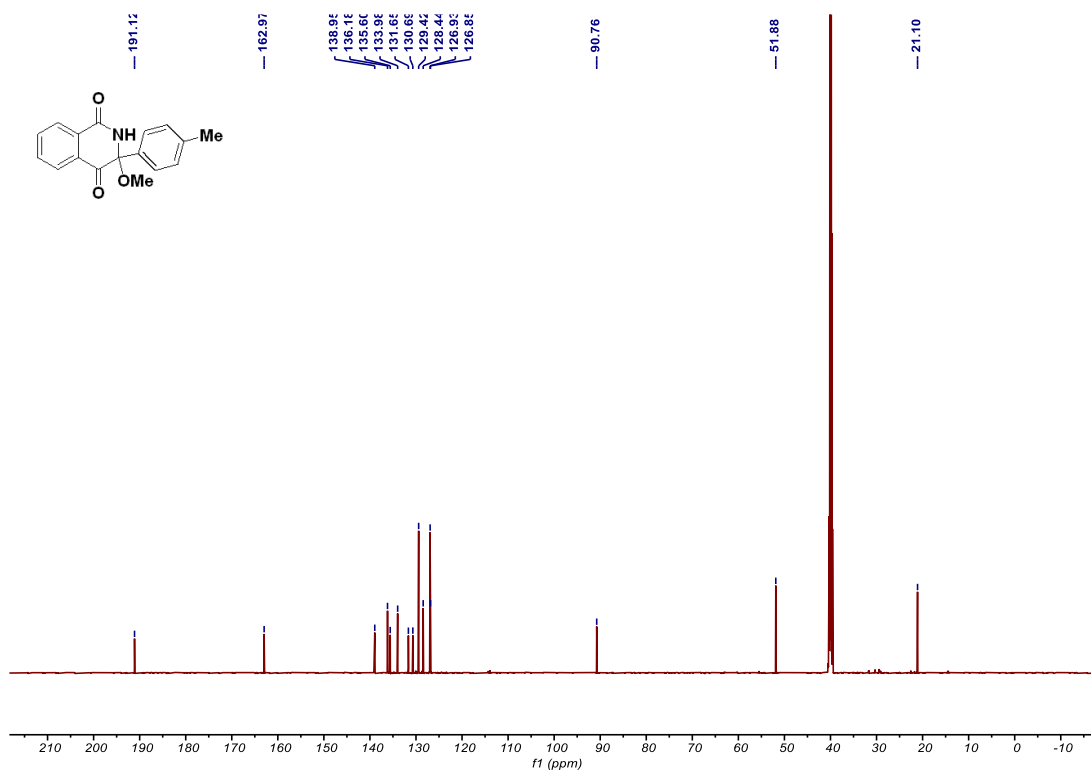

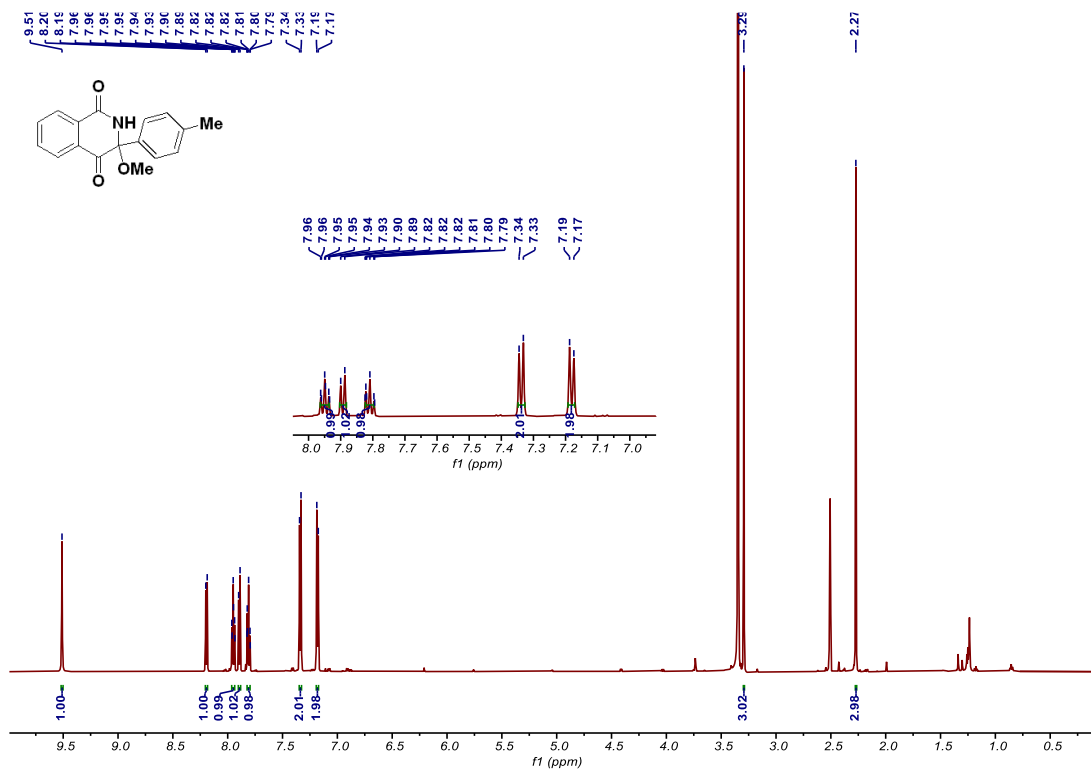

RS14 #3224 RT: 18.22 AV: 1 NL: 7.49E5  
T: FTMS + p ESI Full ms [100.0000-1500.0000]

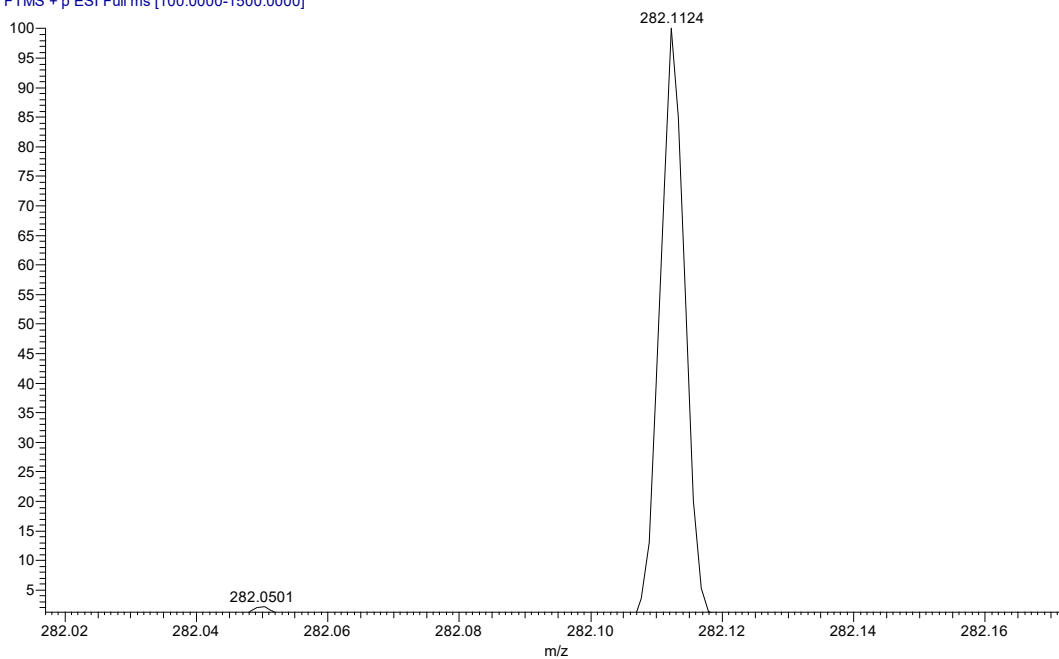

### 3-(4-ethylphenyl)-3-methoxy-2,3-dihydroisoquinoline-1,4-dione (21)

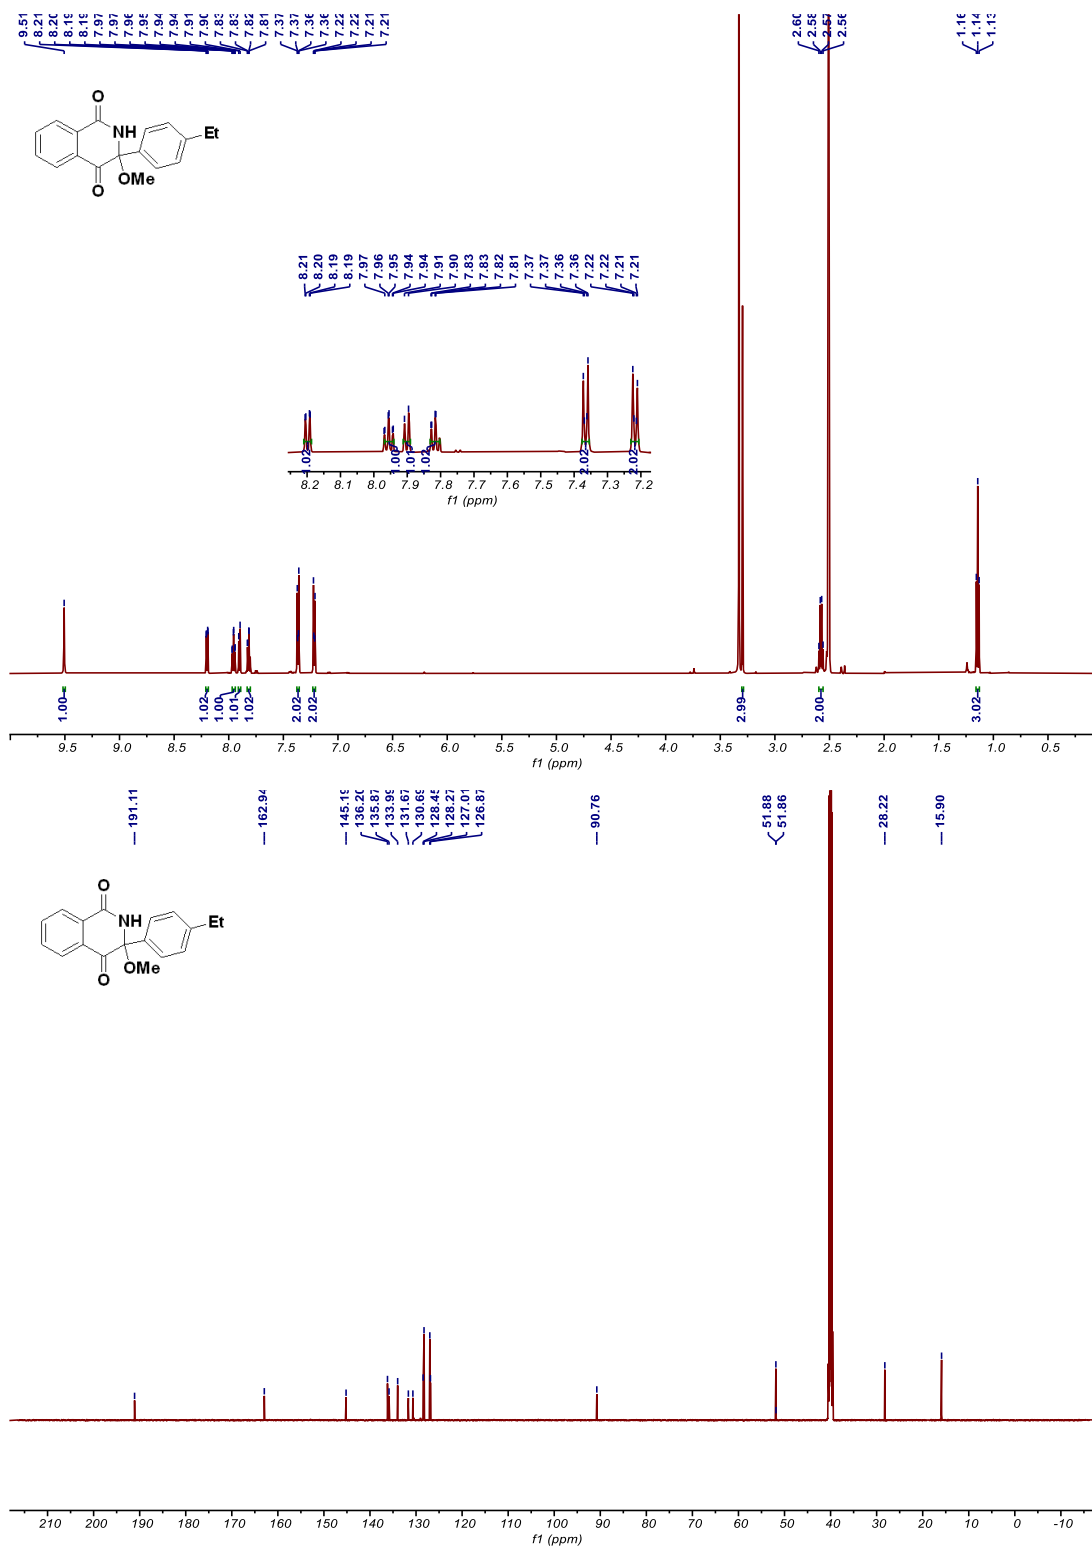

RS12 #3580 RT: 20.00 AV: 1 NL: 2.06E6  
T: FTMS + p ESI Full ms [100.0000-1500.0000]

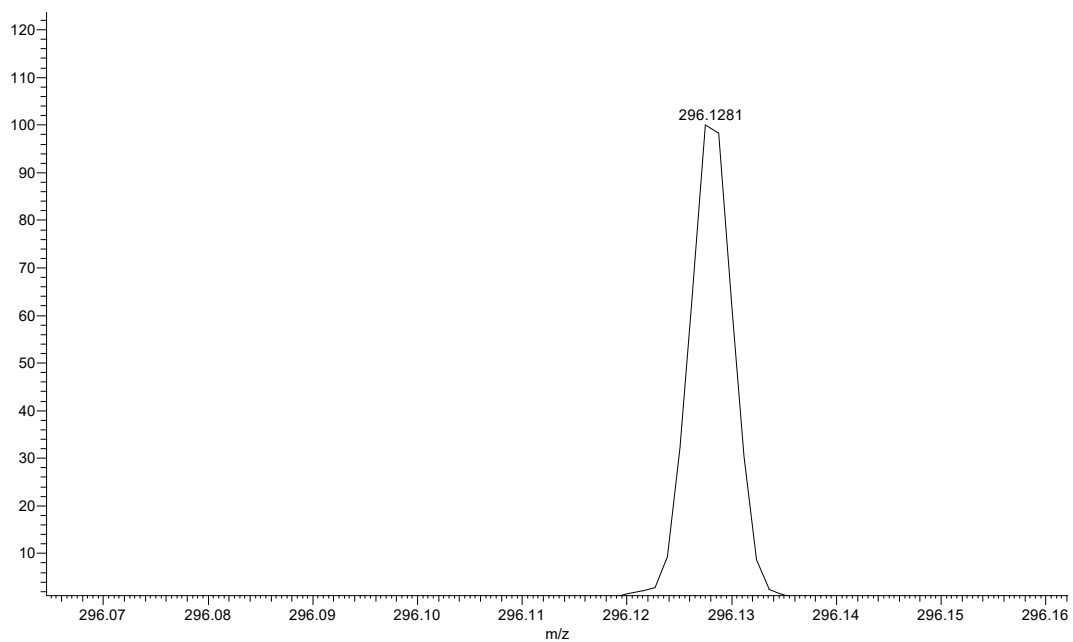

### 3-(4-(tert-butyl)phenyl)-3-methoxy-2,3-dihydroisoquinoline-1,4-dione (22)

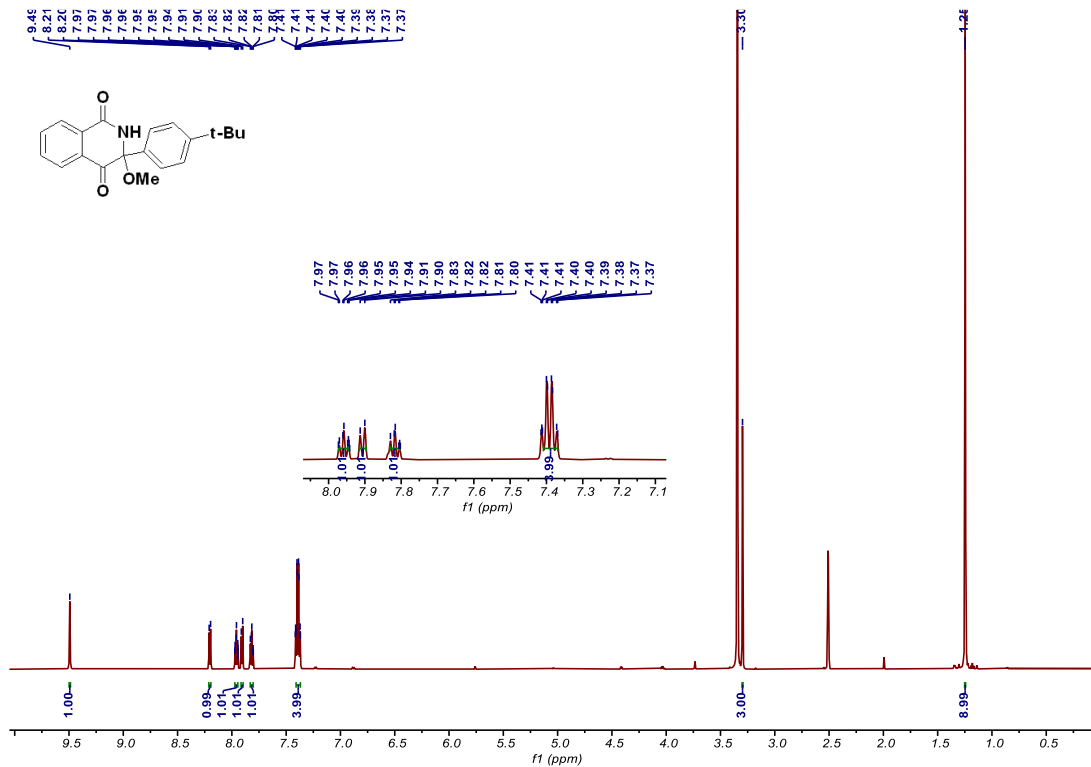

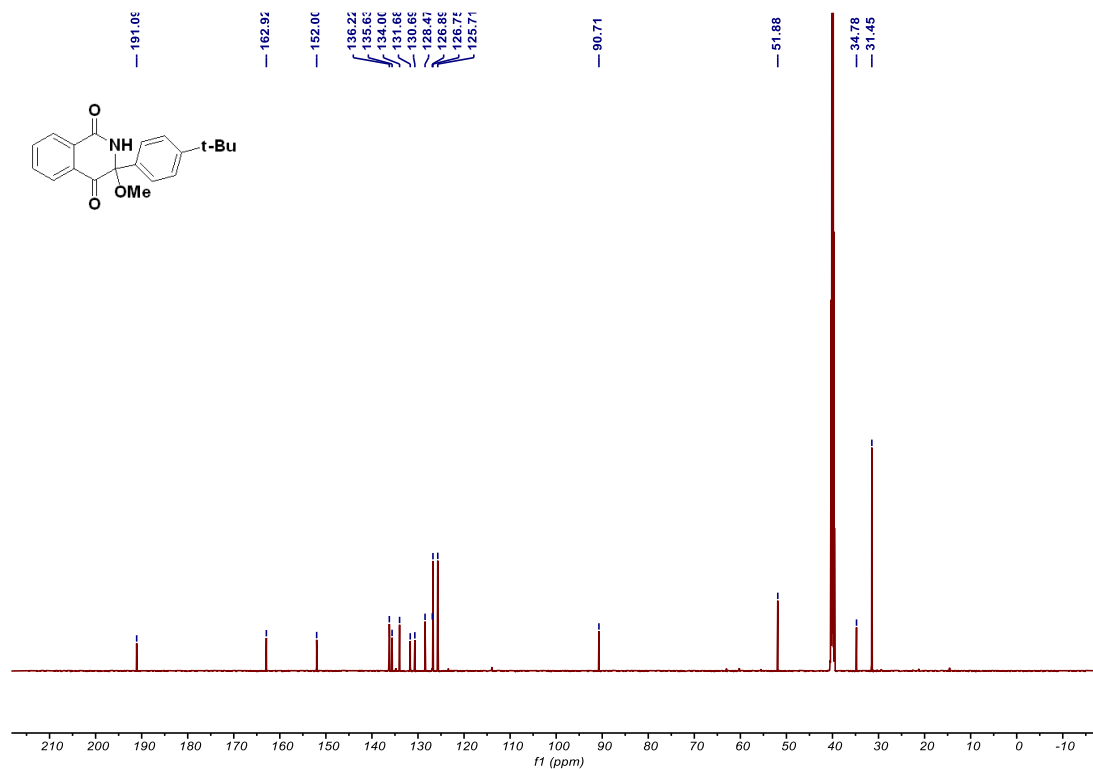

RS14 #18 RT: 0.10 AV: 1 NL: 7.18E4  
T: FTMS + p ESI Full ms [100.0000-1500.0000]

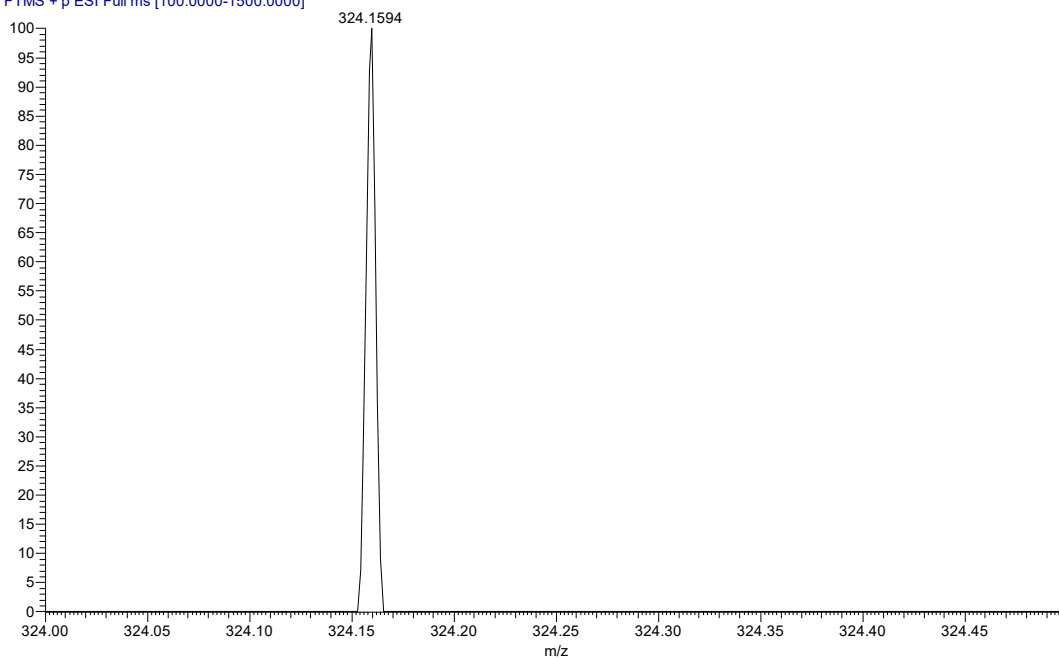

### 3-([1,1'-biphenyl]-4-yl)-3-methoxy-2,3-dihydroisoquinoline-1,4-dione (23)

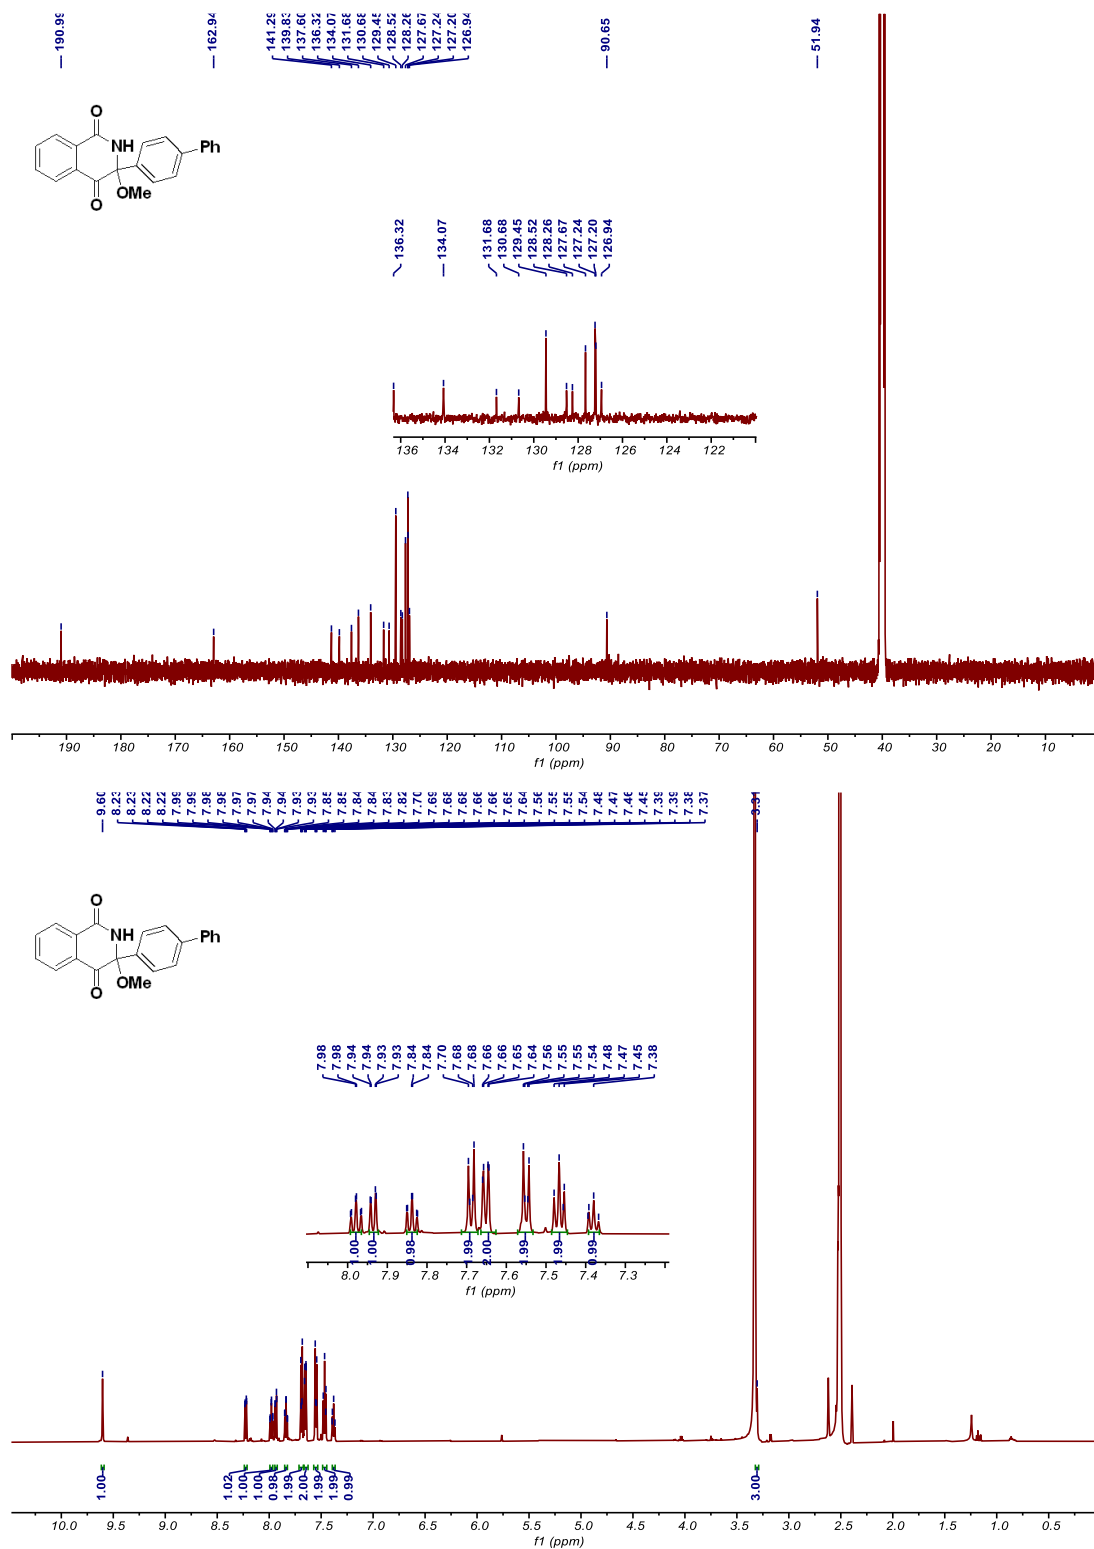

RS12 #3811 RT: 21.26 AV: 1 NL: 1.73E6  
T: FTMS + p ESI Full ms [100.0000-1500.0000]

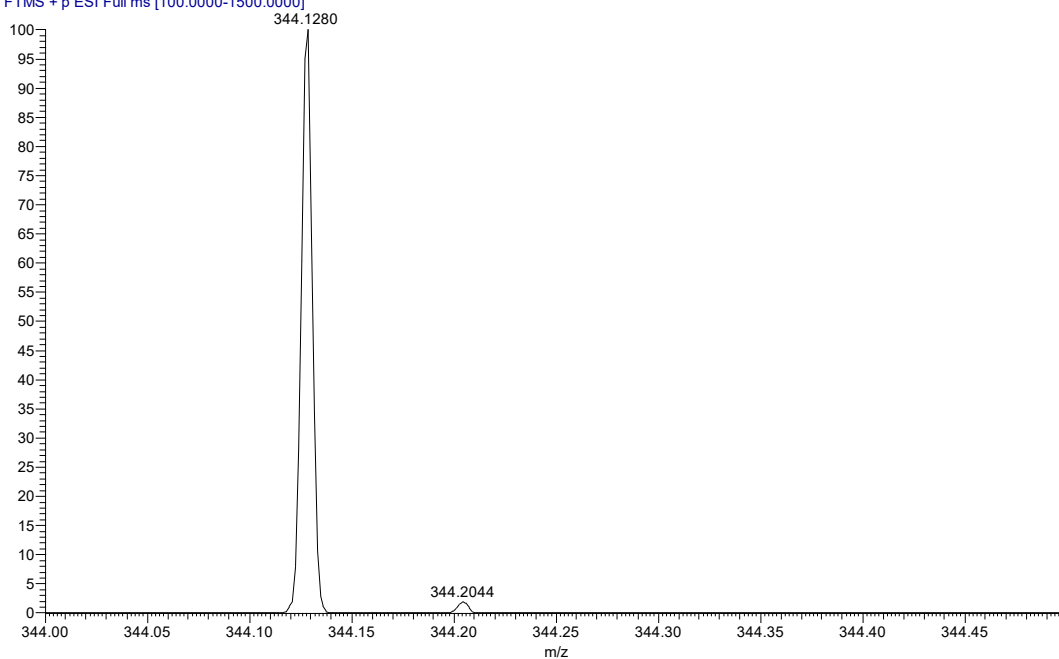

### 3-(4-fluorophenyl)-3-methoxy-2,3-dihydroisoquinoline-1,4-dione (24)

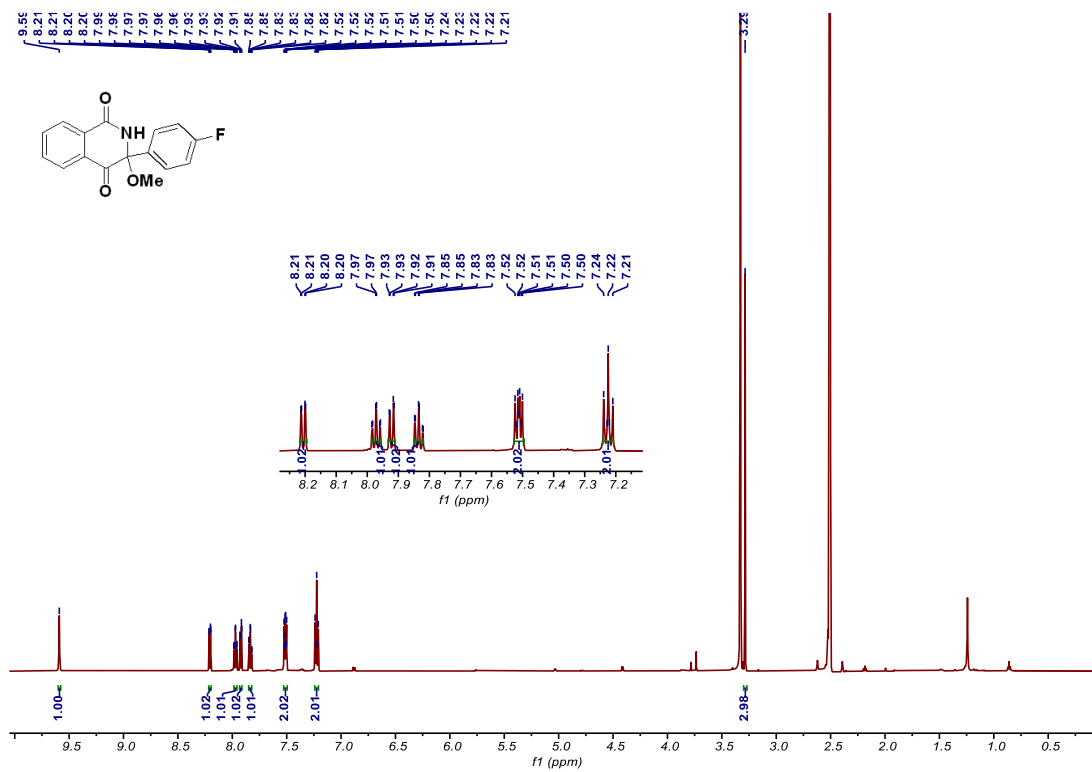

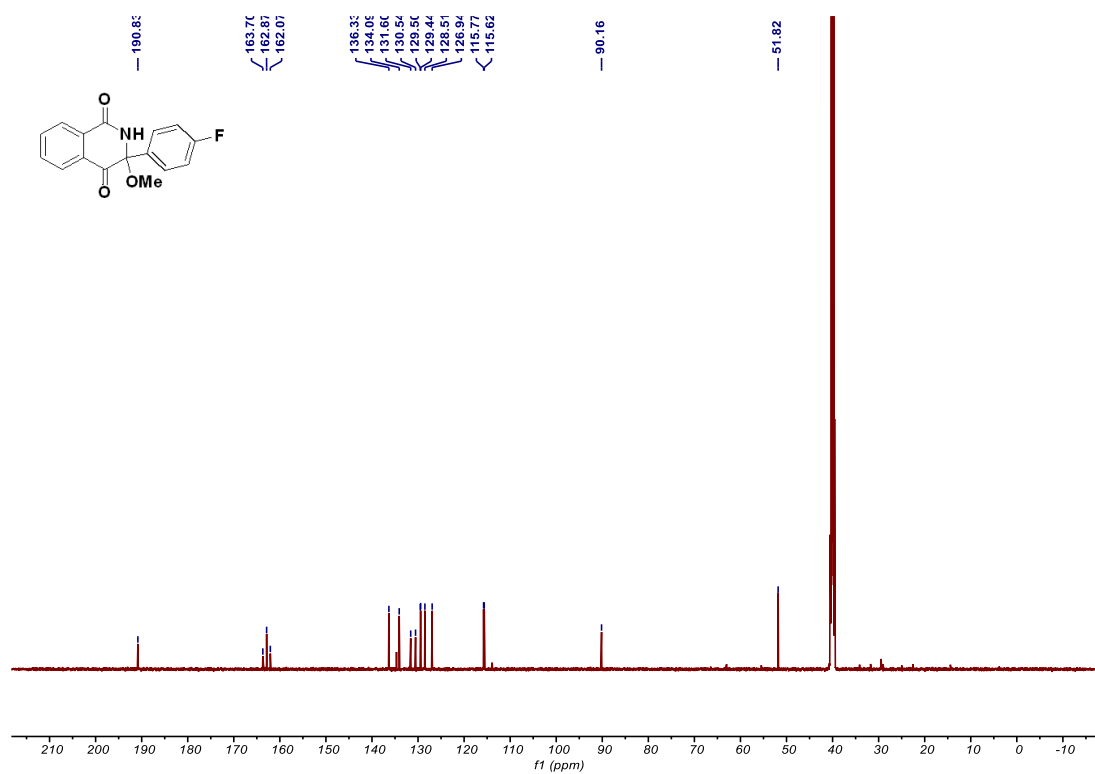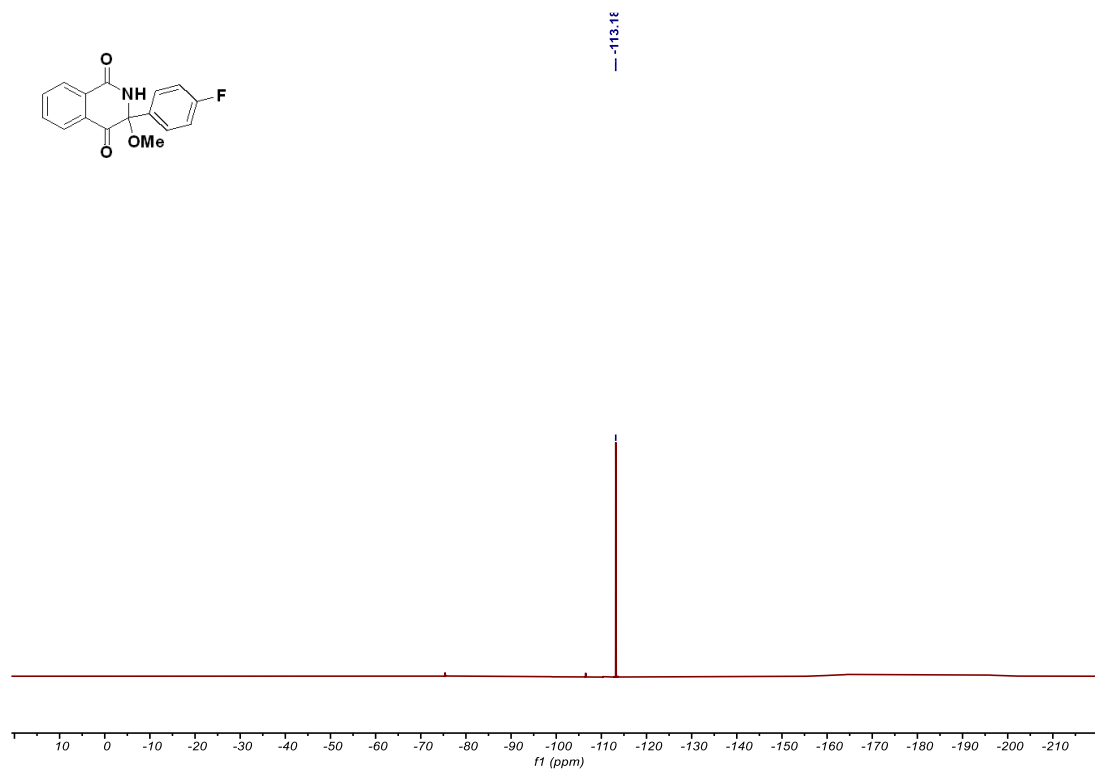



RS14 #3257 RT: 18.40 AV: 1 NL: 2.77E5  
T: FTMS + p ESI Full ms [100.0000-1500.0000]

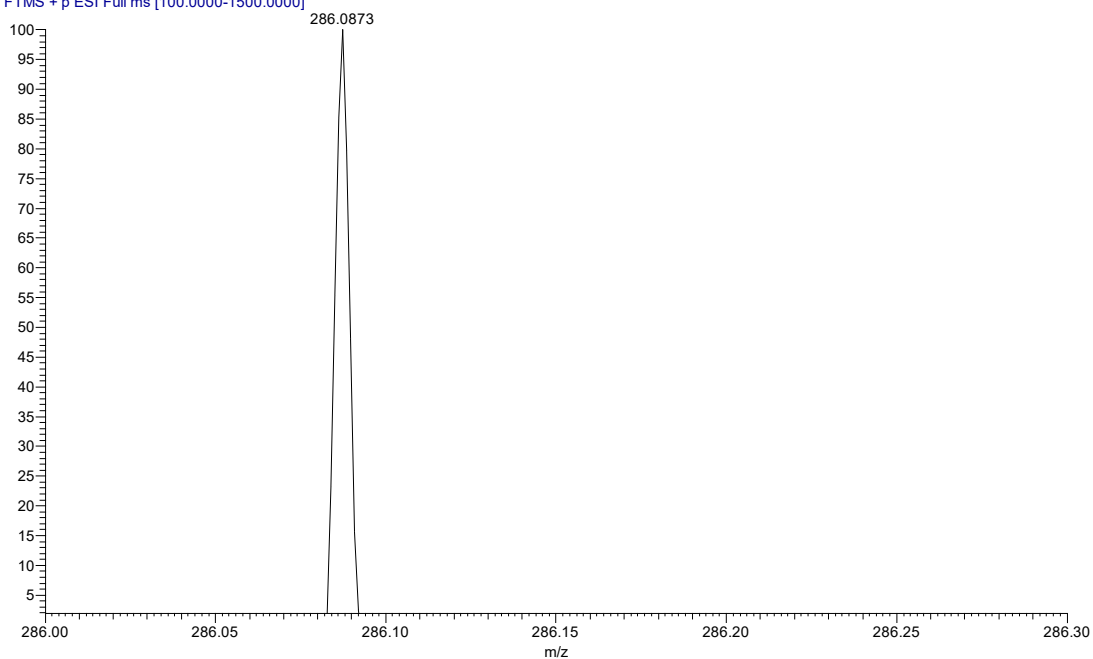

### 3-(4-chlorophenyl)-3-methoxy-2,3-dihydroisoquinoline-1,4-dione (25)

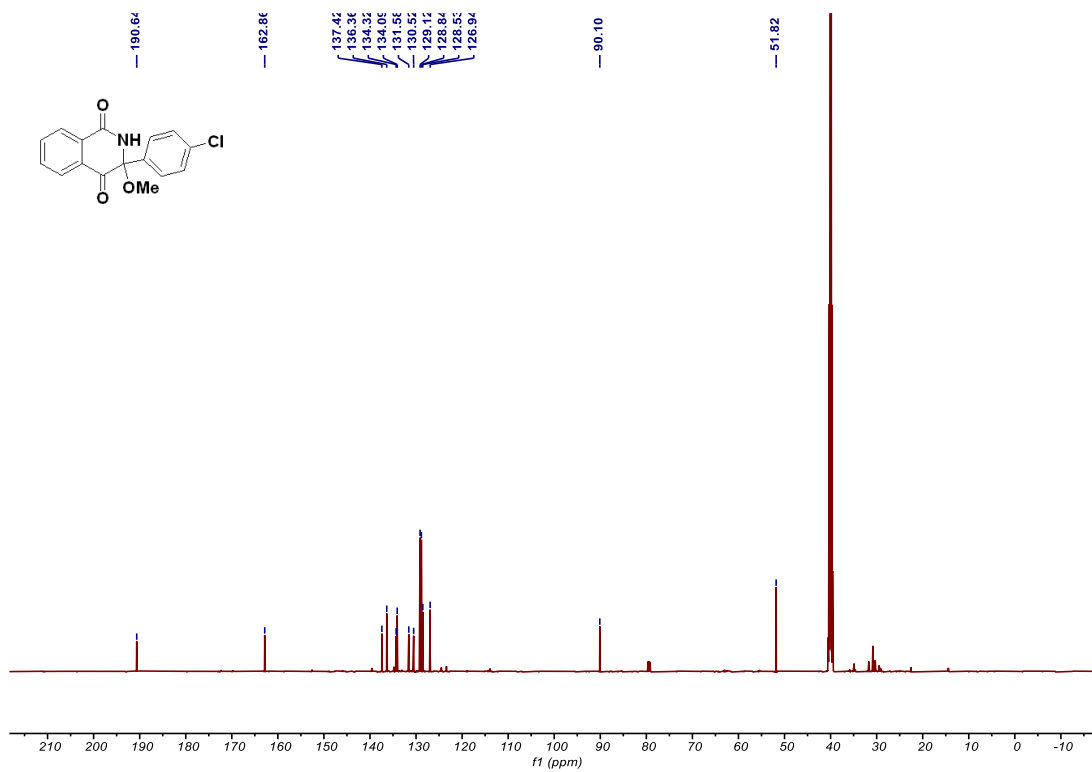

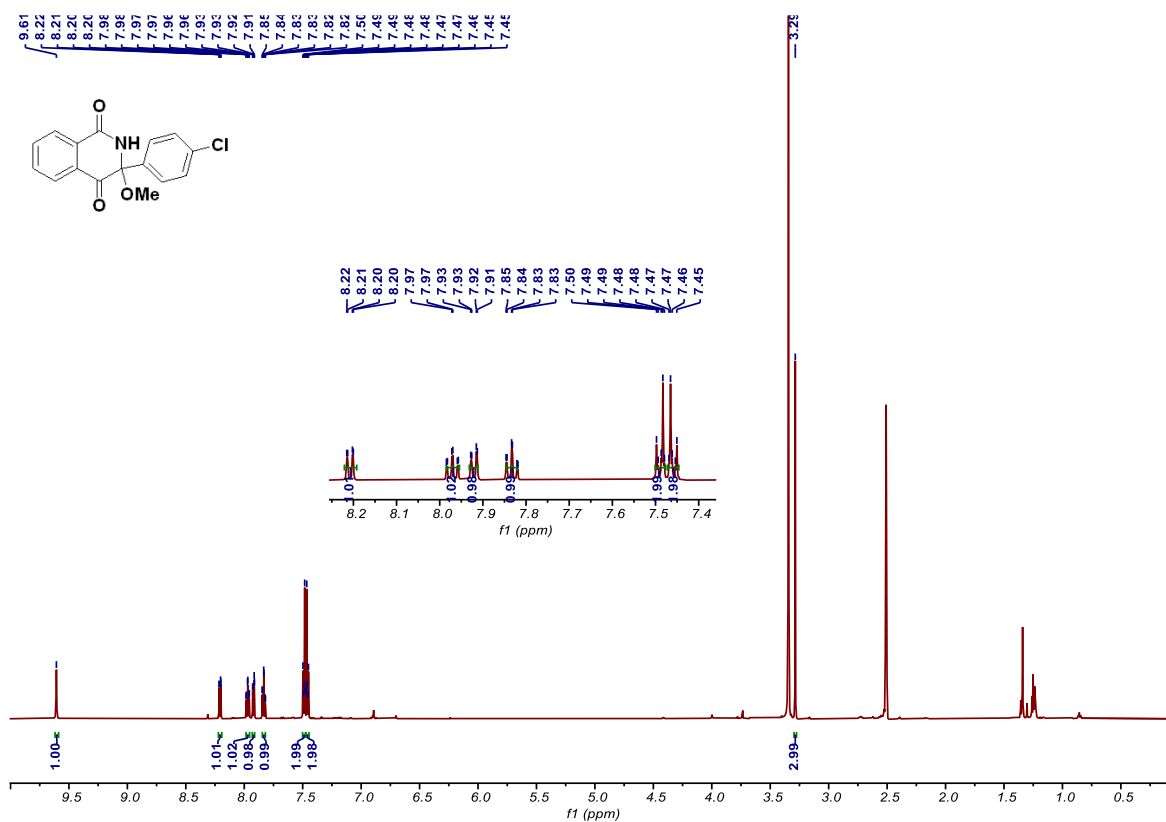

RS14 #3459 RT: 19.48 AV: 1 NL: 5.26E7  
T: FTMS + p ESI Full ms [100.0000-1500.0000]

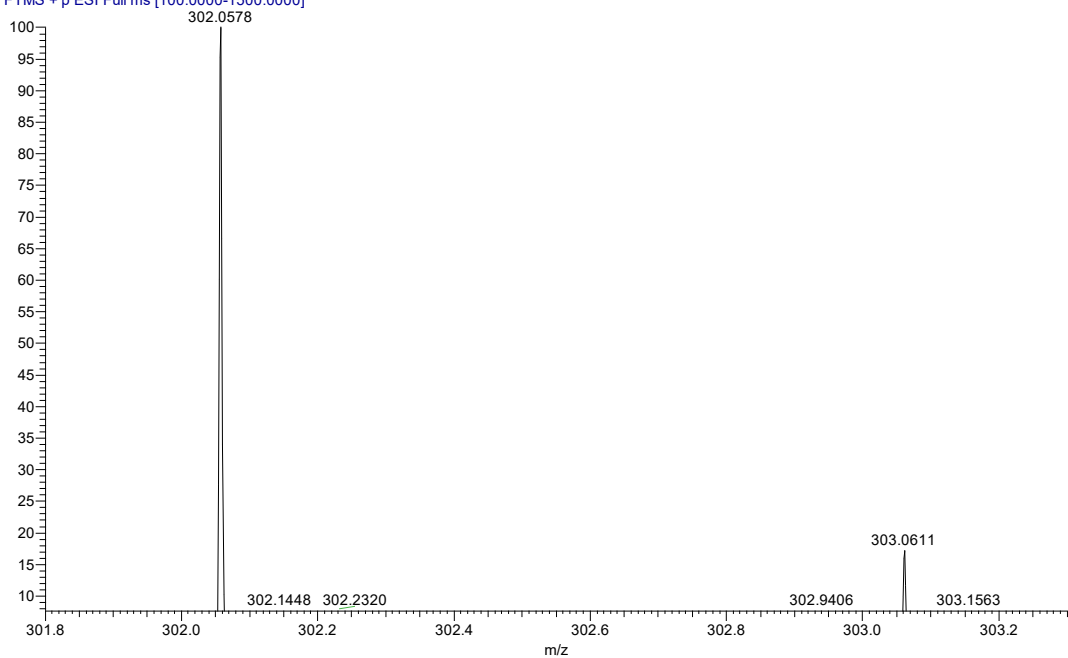

### 3-(4-bromophenyl)-3-methoxy-2,3-dihydroisoquinoline-1,4-dione (26)

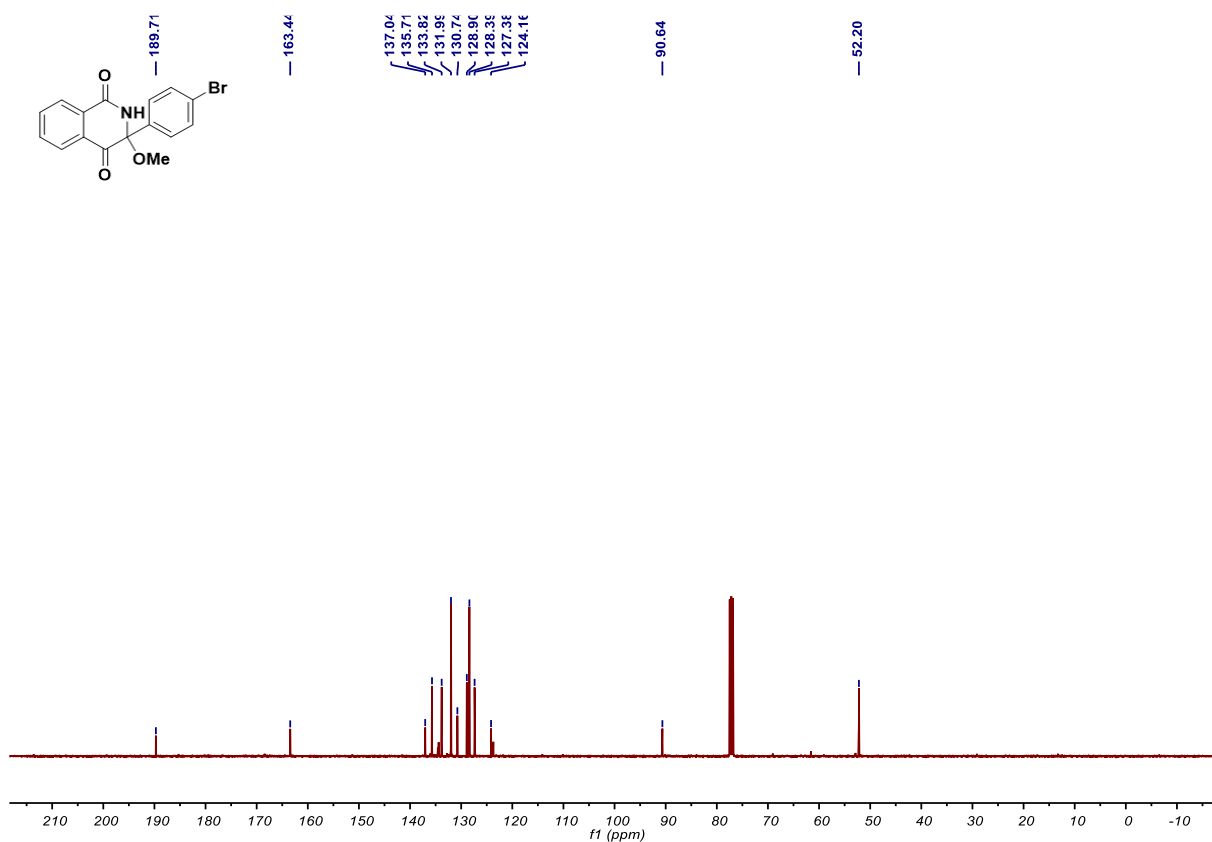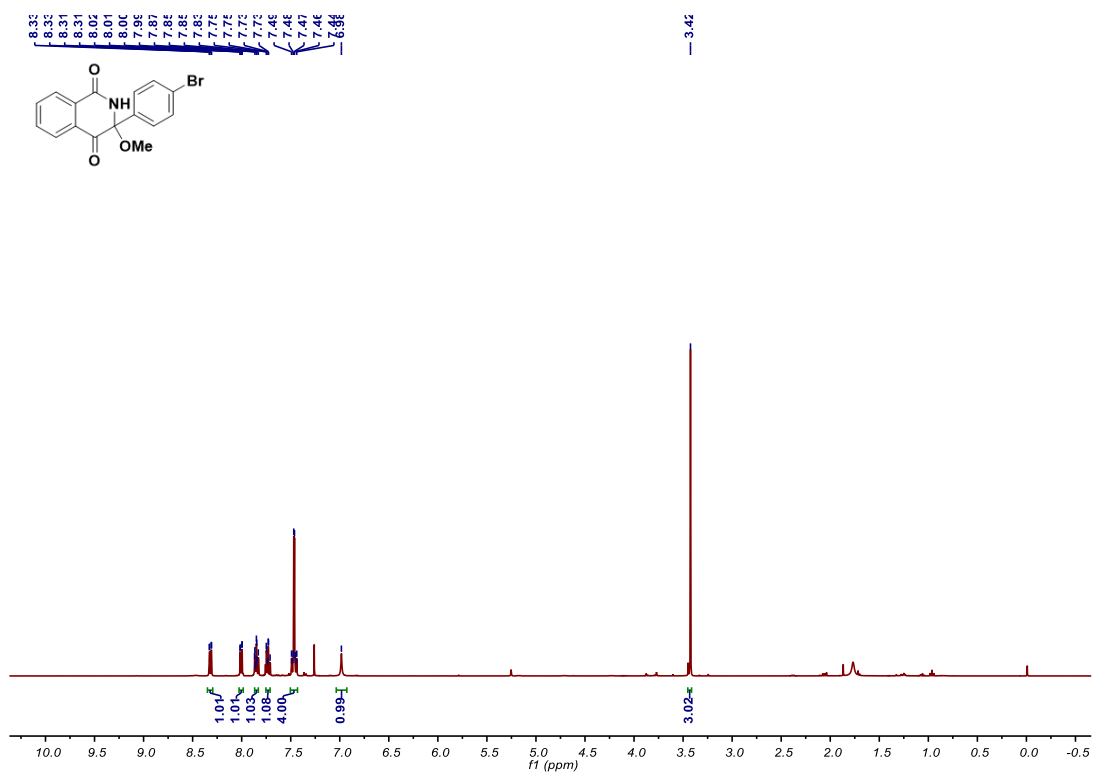

RS12 #3626 RT: 20.25 AV: 1 NL: 2.75E5  
T: FTMS + p ESI Full ms [100.0000-1500.0000]

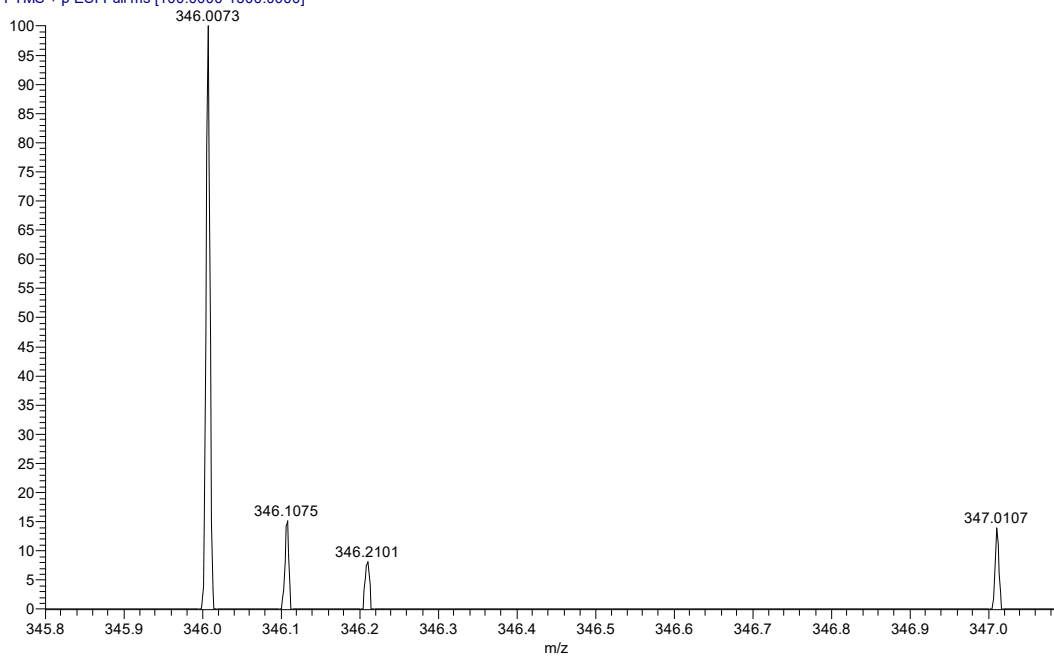

**methyl 4-(3-methoxy-1,4-dioxo-1,2,3,4-tetrahydroisoquinolin-3-yl)benzoate (27)**

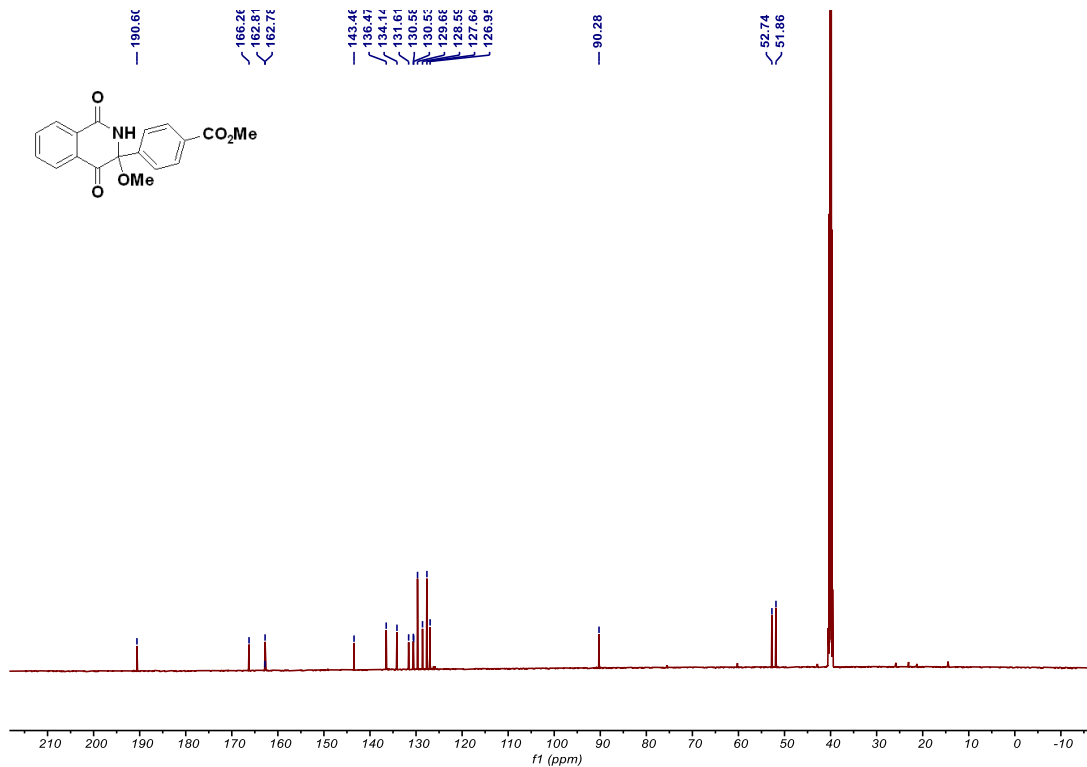

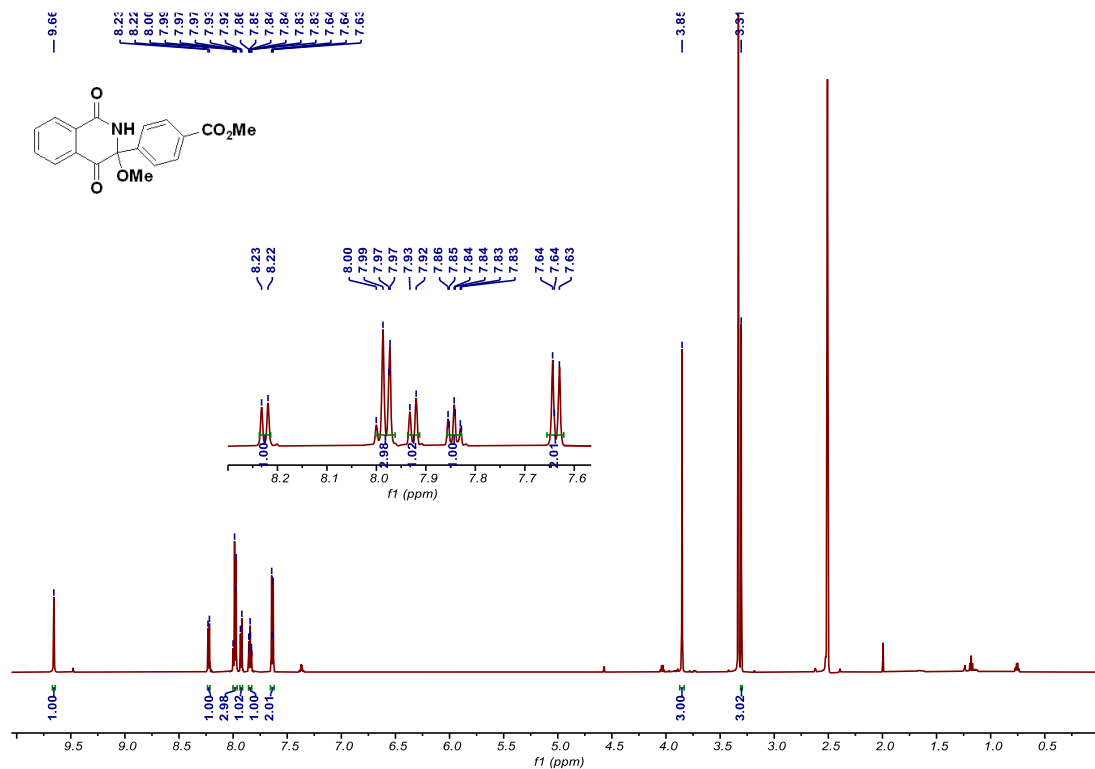

RS12 #3226 RT: 18.11 AV: 1 NL: 4.16E6  
T: FTMS + p ESI Full ms [100.0000-1500.0000]

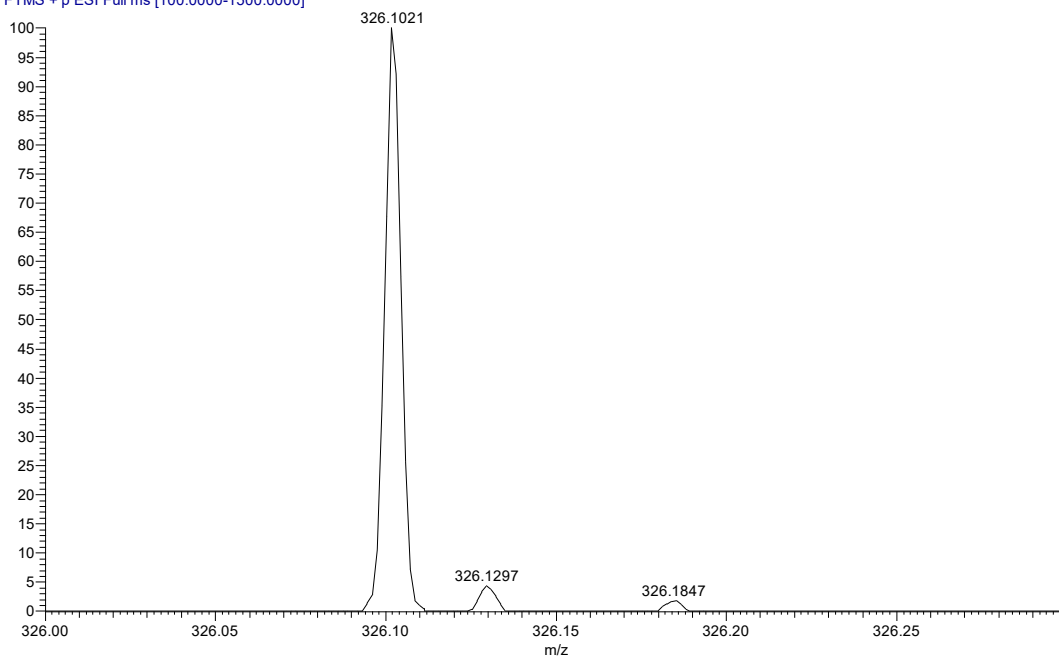

**4-(3-methoxy-1,4-dioxo-1,2,3,4-tetrahydroisoquinolin-3-yl)benzonitrile (28)**

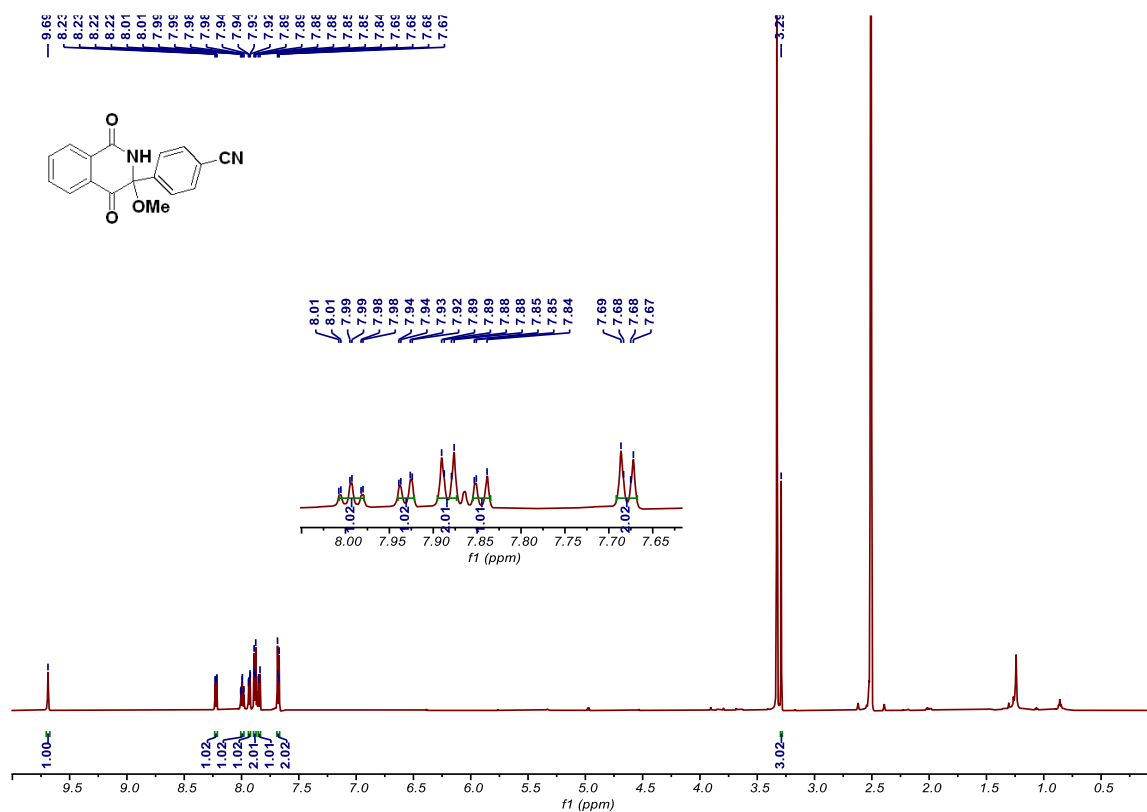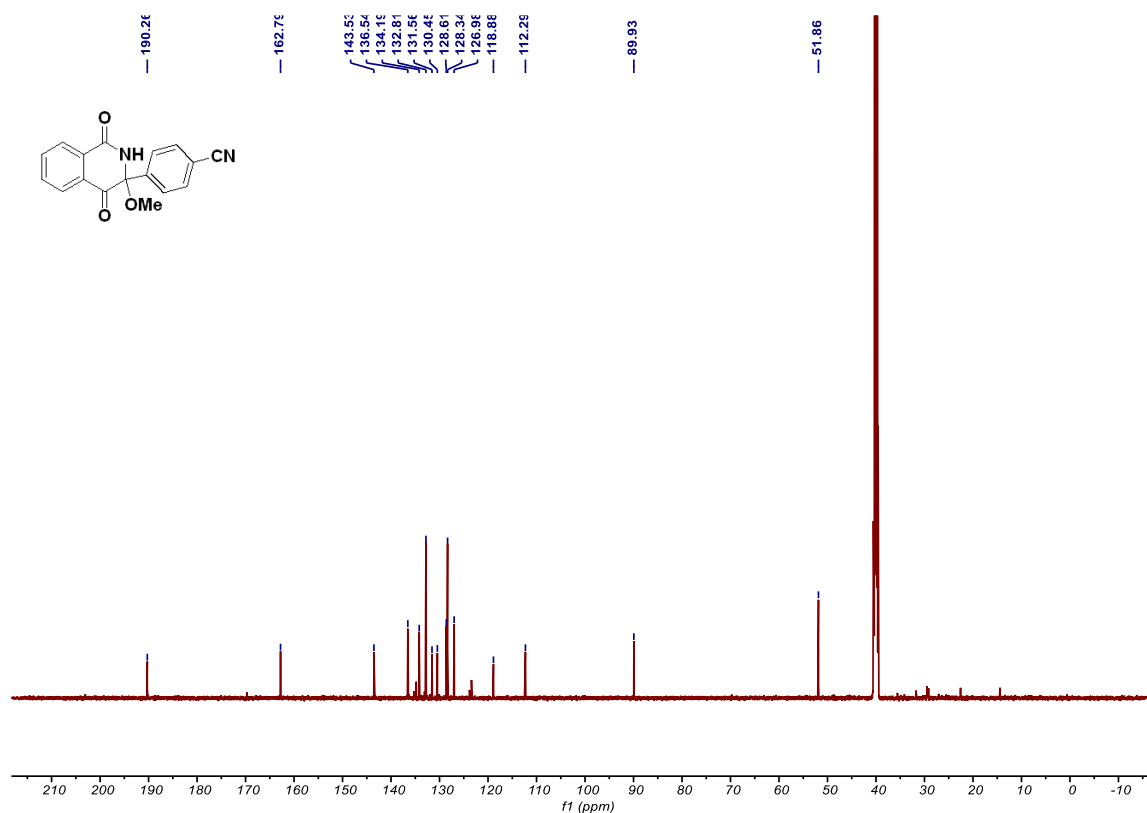

RS11 #3028 RT: 17.08 AV: 1 NL: 1.47E6  
T: FTMS + p ESI Full ms [100.0000-1500.0000]

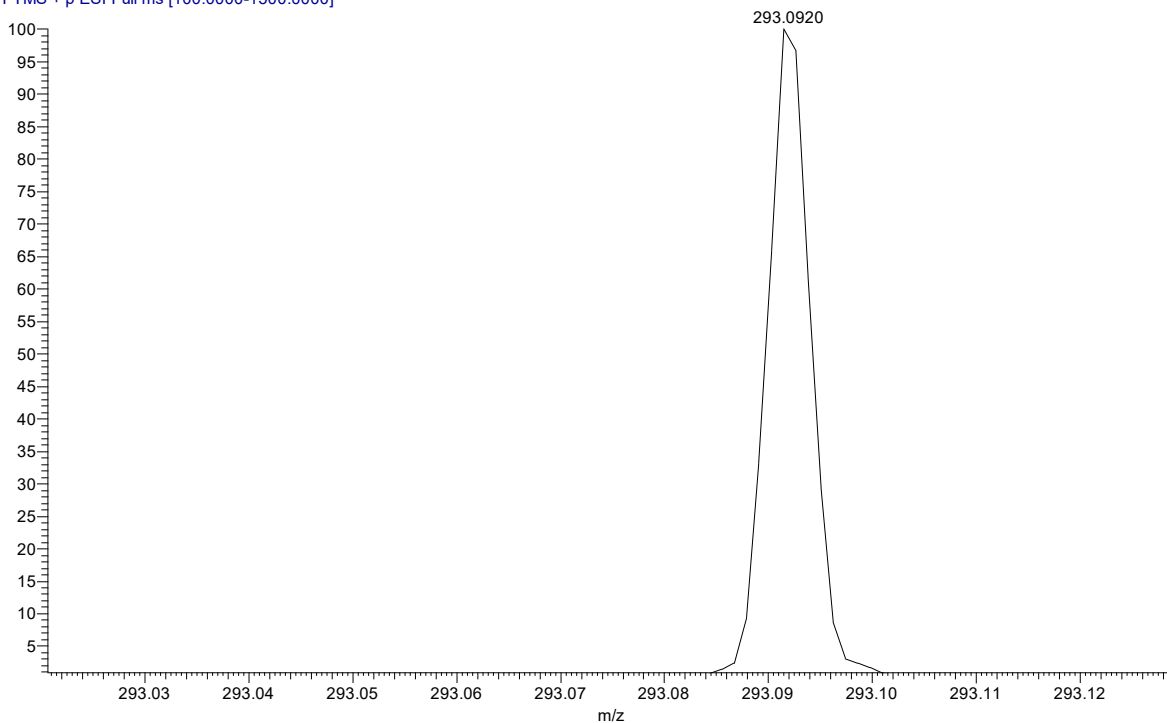

### 3-methoxy-3-(4-(trifluoromethyl)phenyl)-2,3-dihydroisoquinoline-1,4-dione (29)

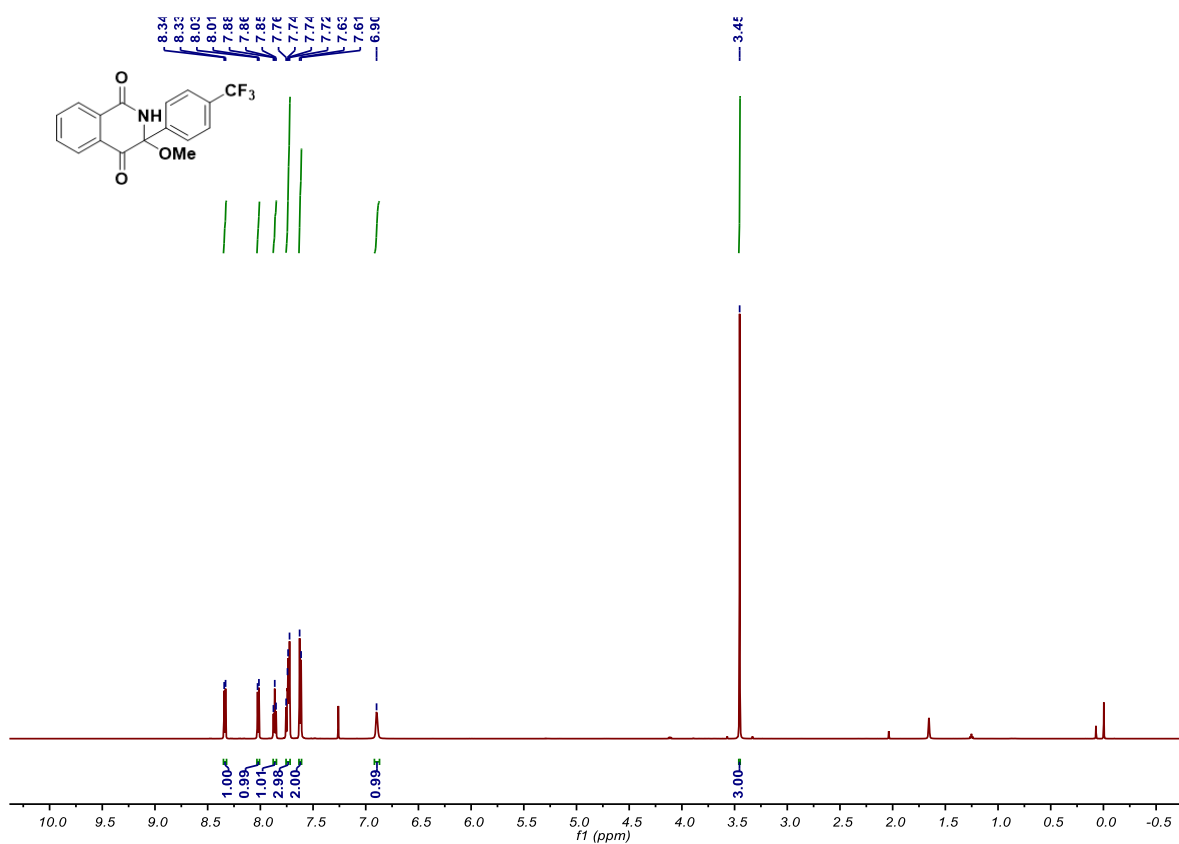

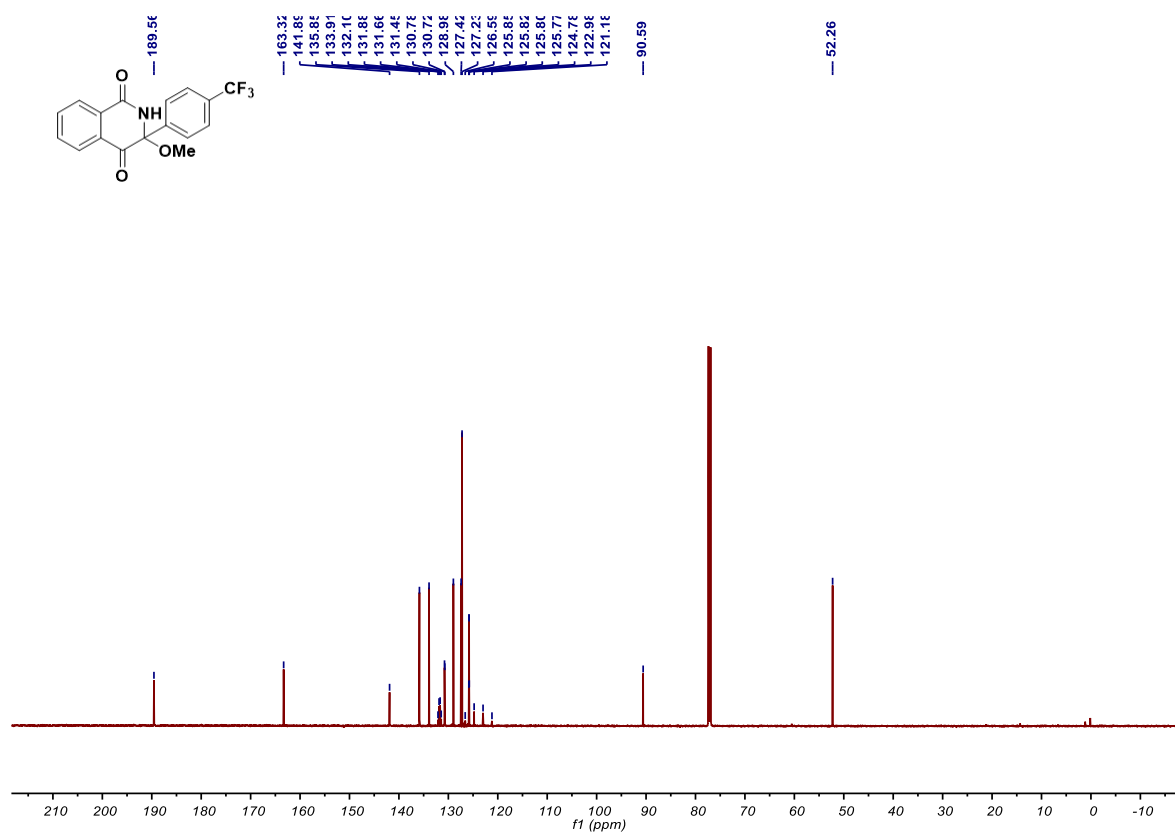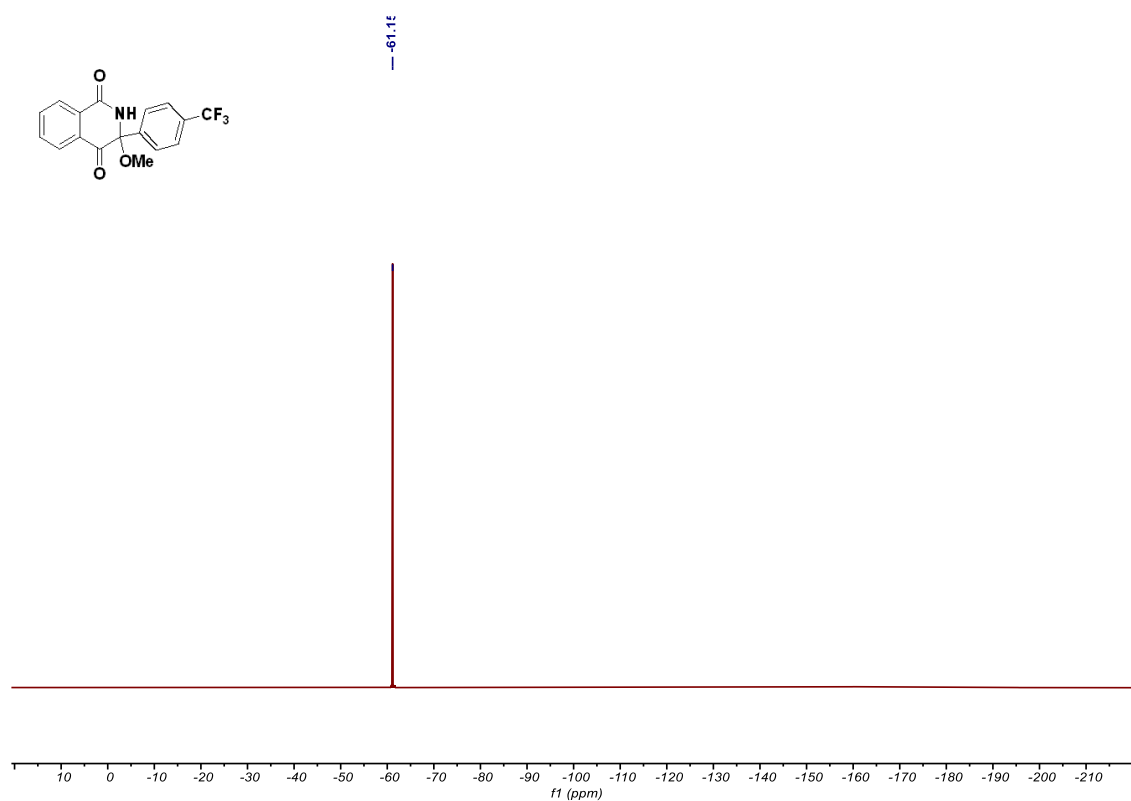



RS14 #3660 RT: 20.56 AV: 1 NL: 1.37E5  
T: FTMS + p ESI Full ms [100.0000-1500.0000]

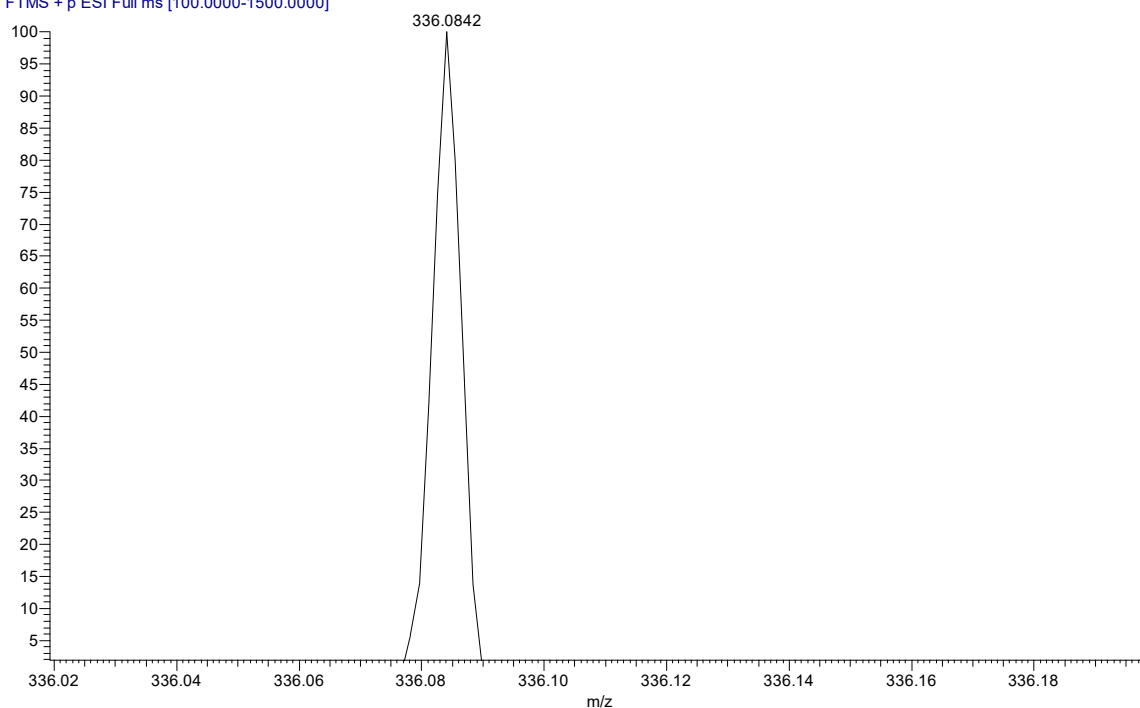

### 3-methoxy-3-(4-(trifluoromethoxy)phenyl)-2,3-dihydroisoquinoline-1,4-dione (30)

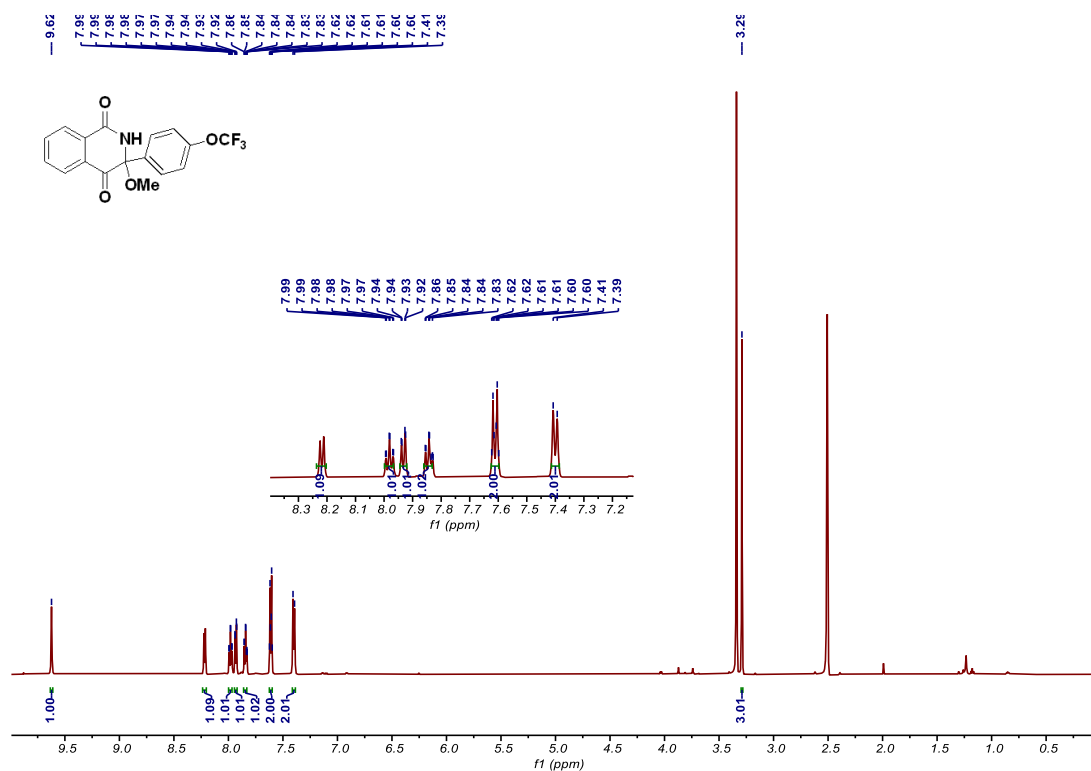

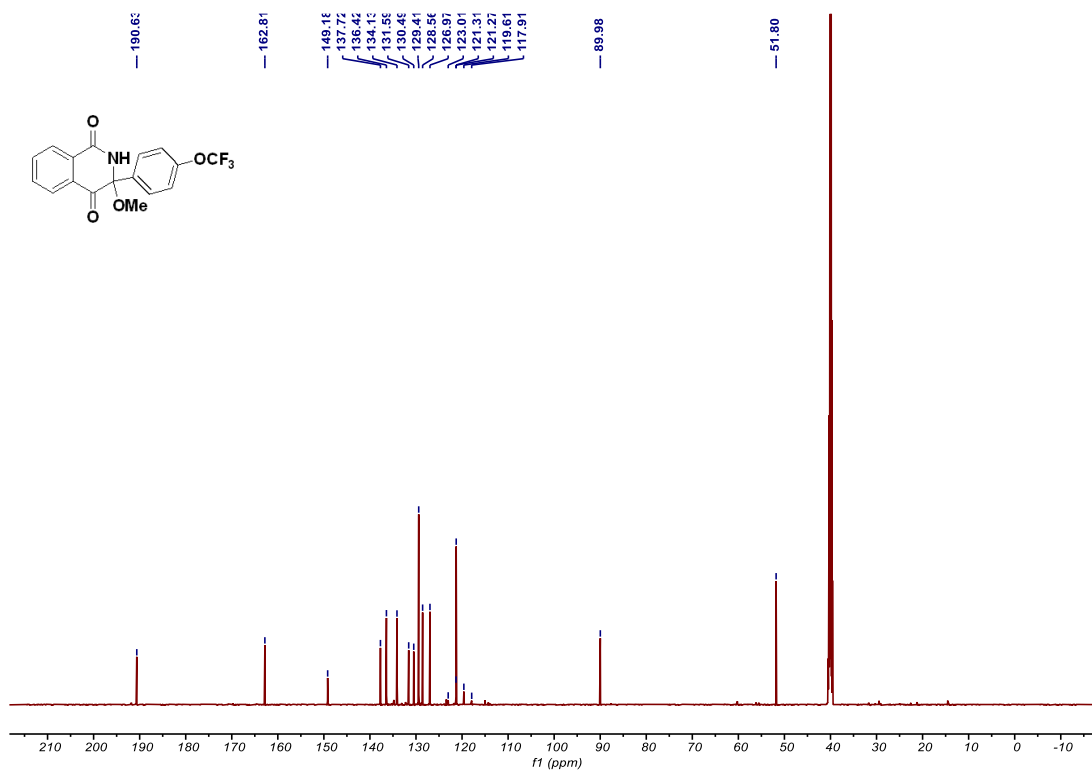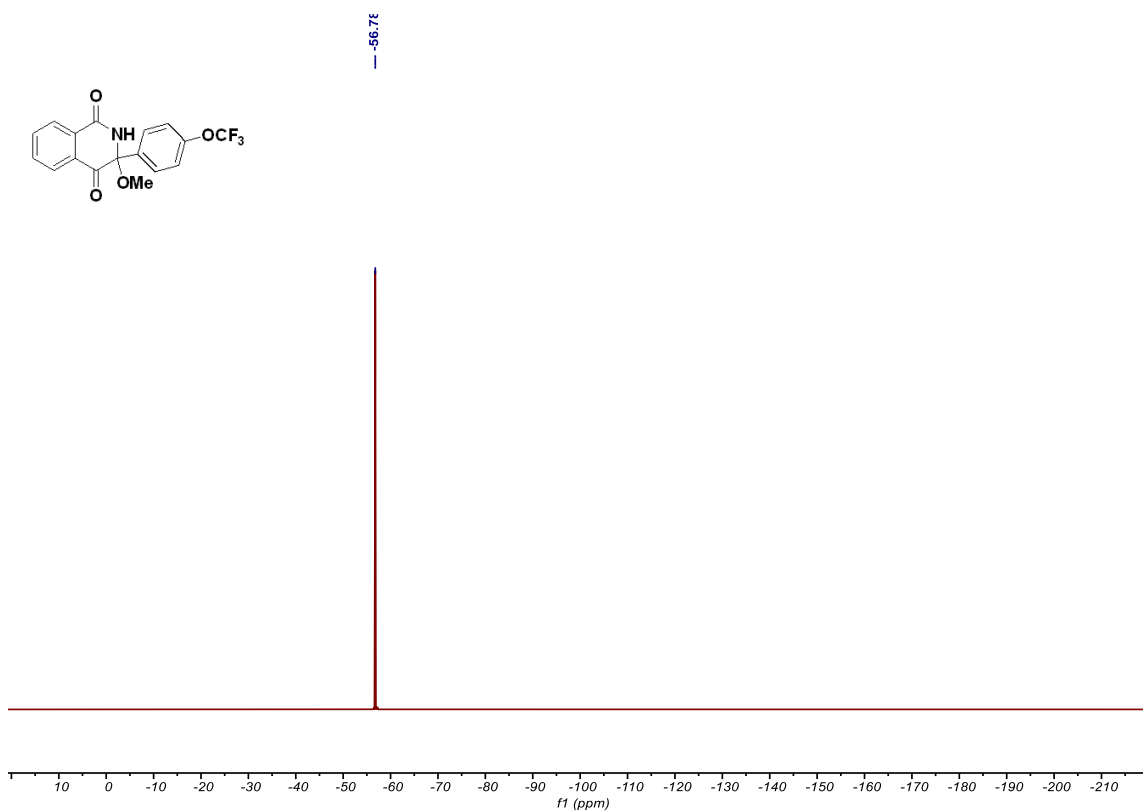

RS14 #5417 RT: 29.97 AV: 1 NL: 6.97E4  
T: FTMS + p ESI Full ms [100.0000-1500.0000]

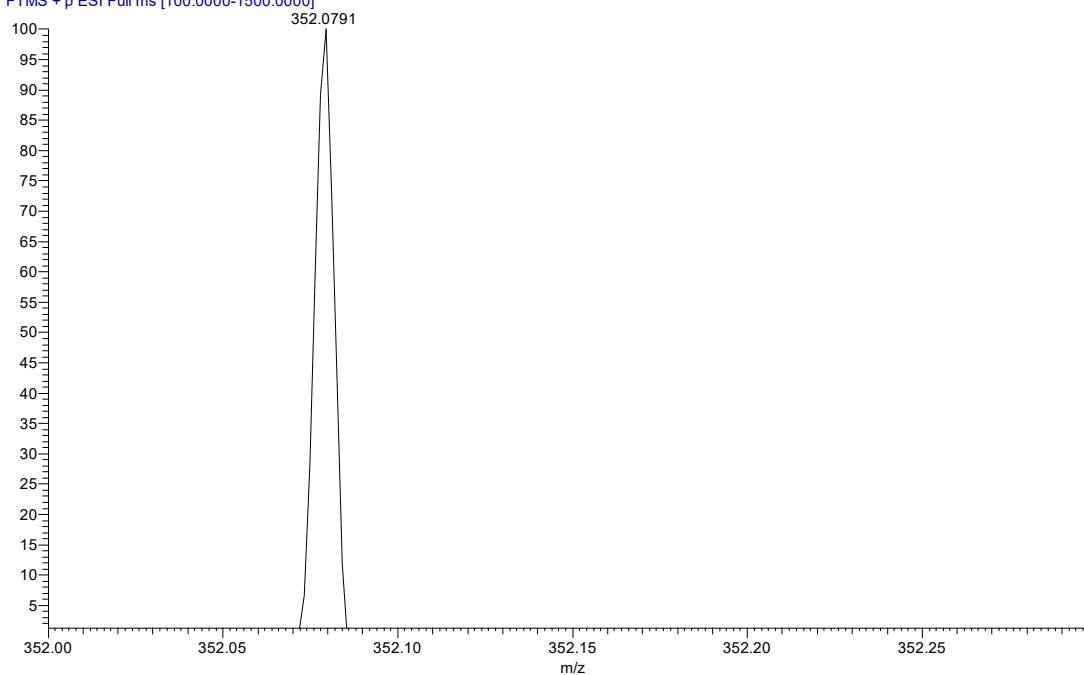

### 3-methoxy-3-(4-pentanoylphenyl)-2,3-dihydroisoquinoline-1,4-dione (31)

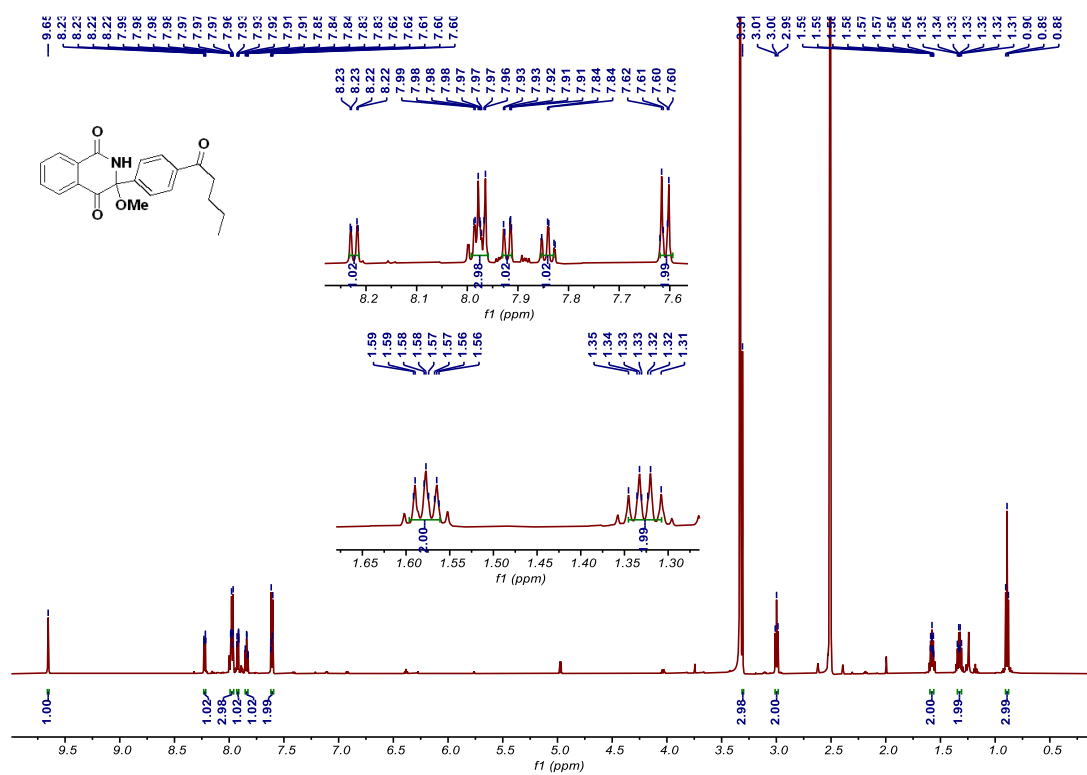

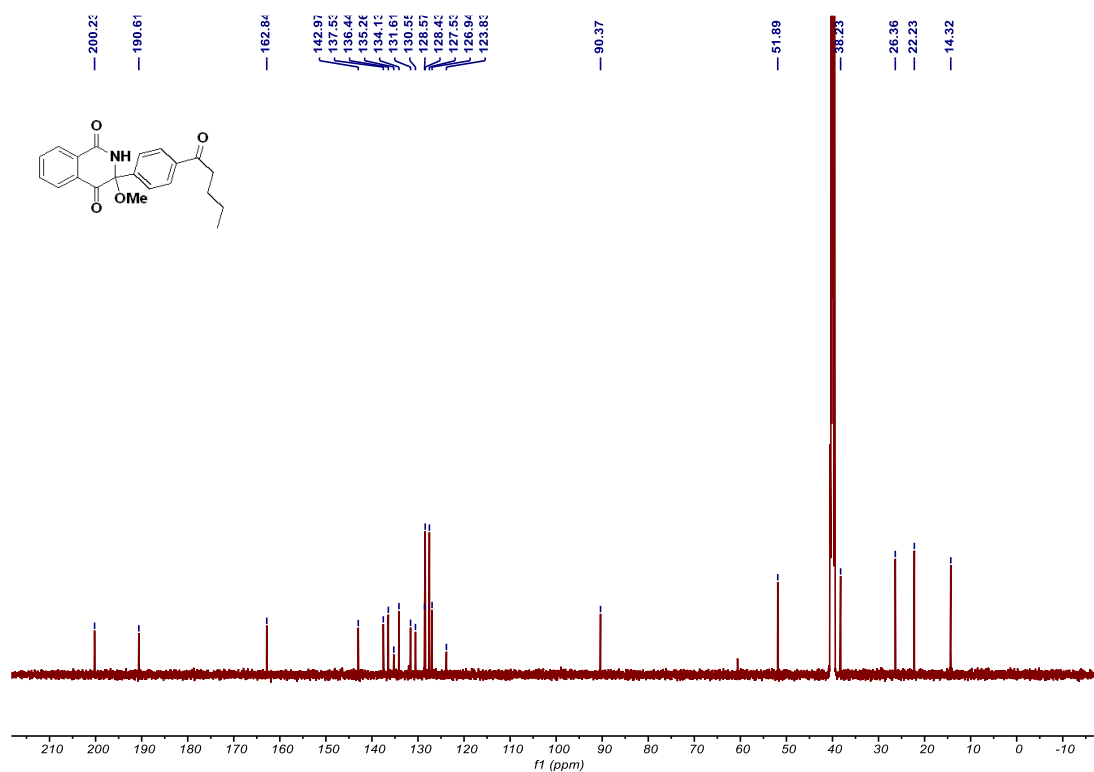

RS14 #3927 RT: 22.00 AV: 1 NL: 8.52E4  
T: FTMS + p ESI Full ms [100.0000-1500.0000]

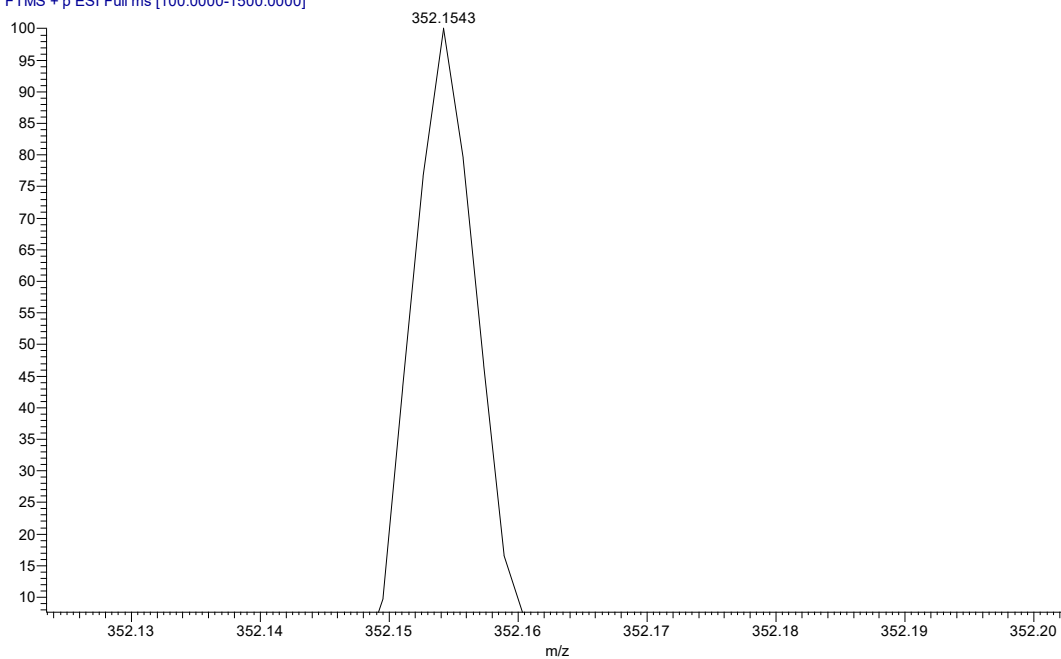

### 3-(3-chlorophenyl)-3-methoxy-2,3-dihydroisoquinoline-1,4-dione (32)

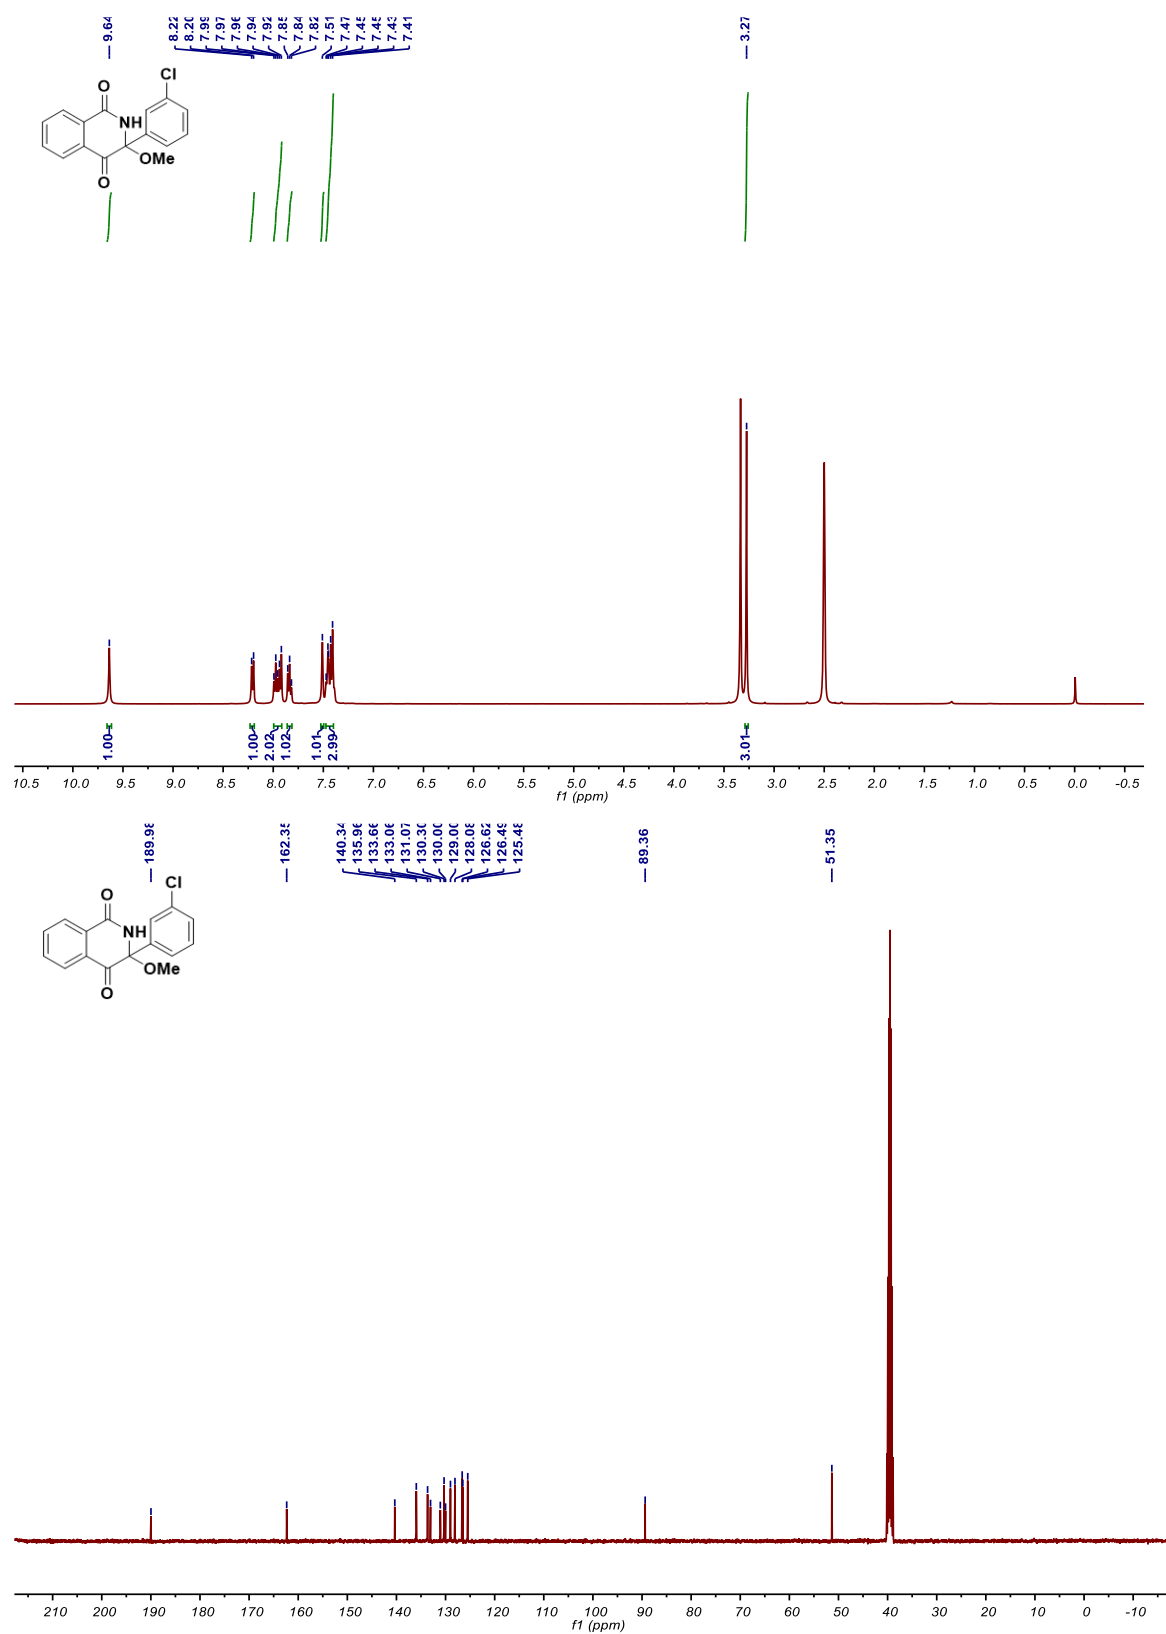

RS13 #3410 RT: 19.20 AV: 1 NL: 1.88E7  
T: FTMS + p ESI Full ms [100.0000-1500.0000]

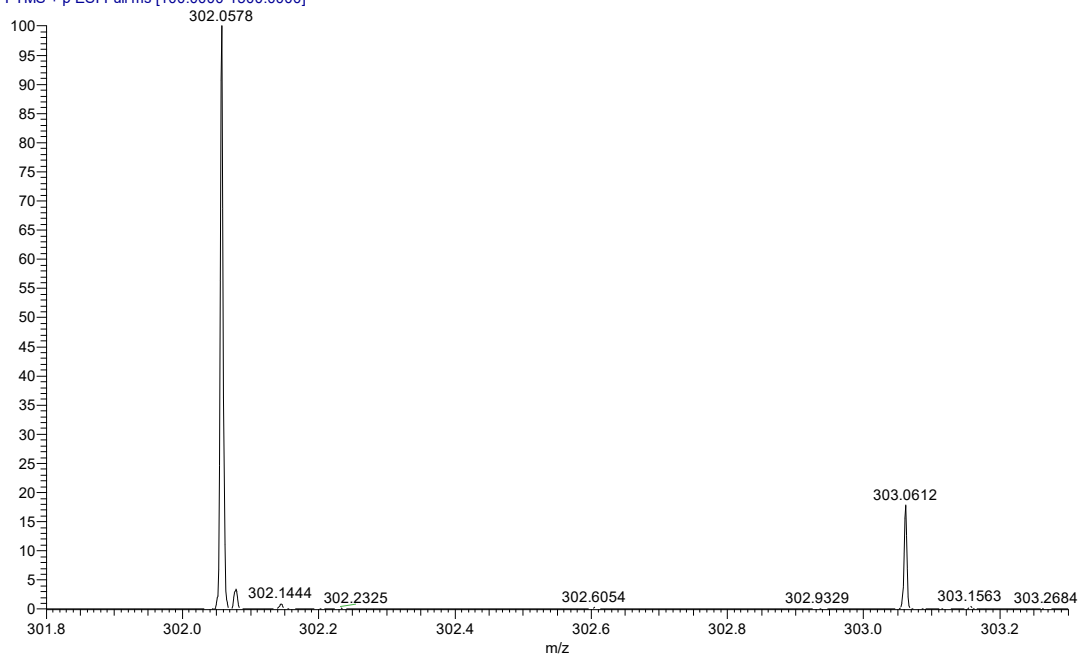

### 3-methoxy-3-(naphthalen-2-yl)-2,3-dihydroisoquinoline-1,4-dione (33)

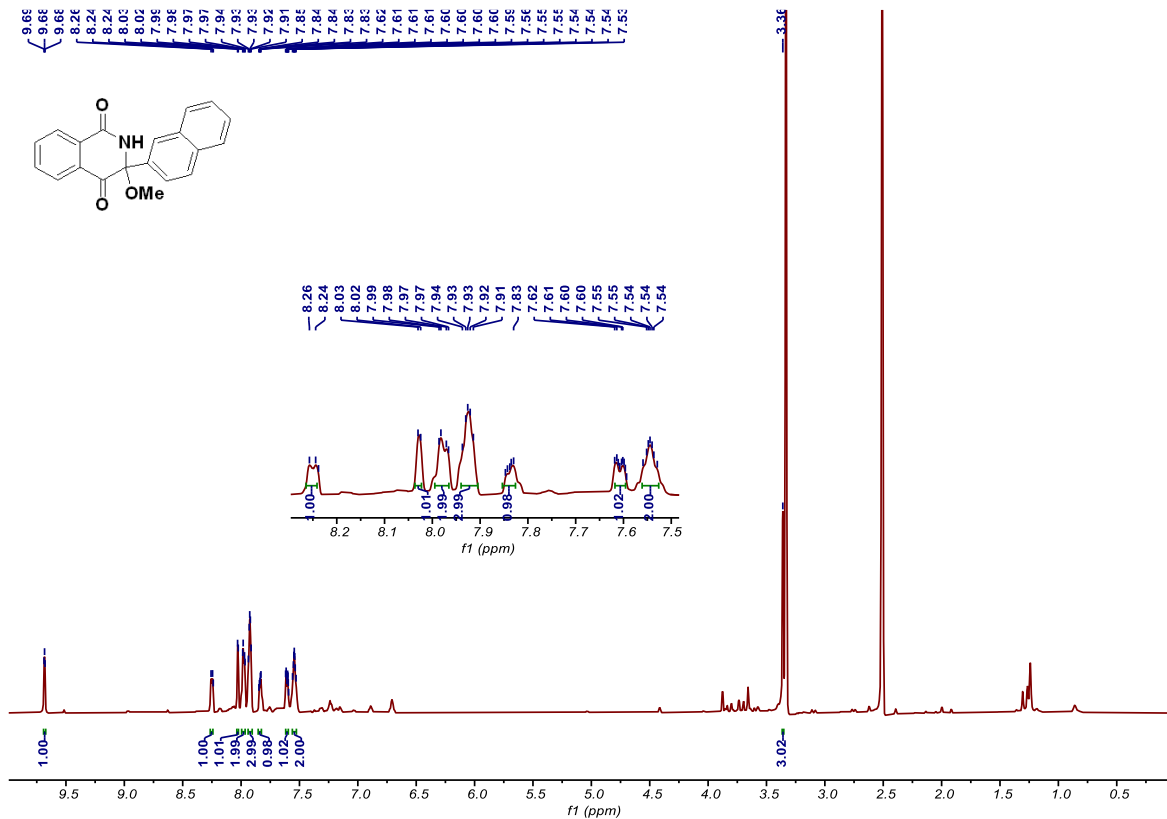

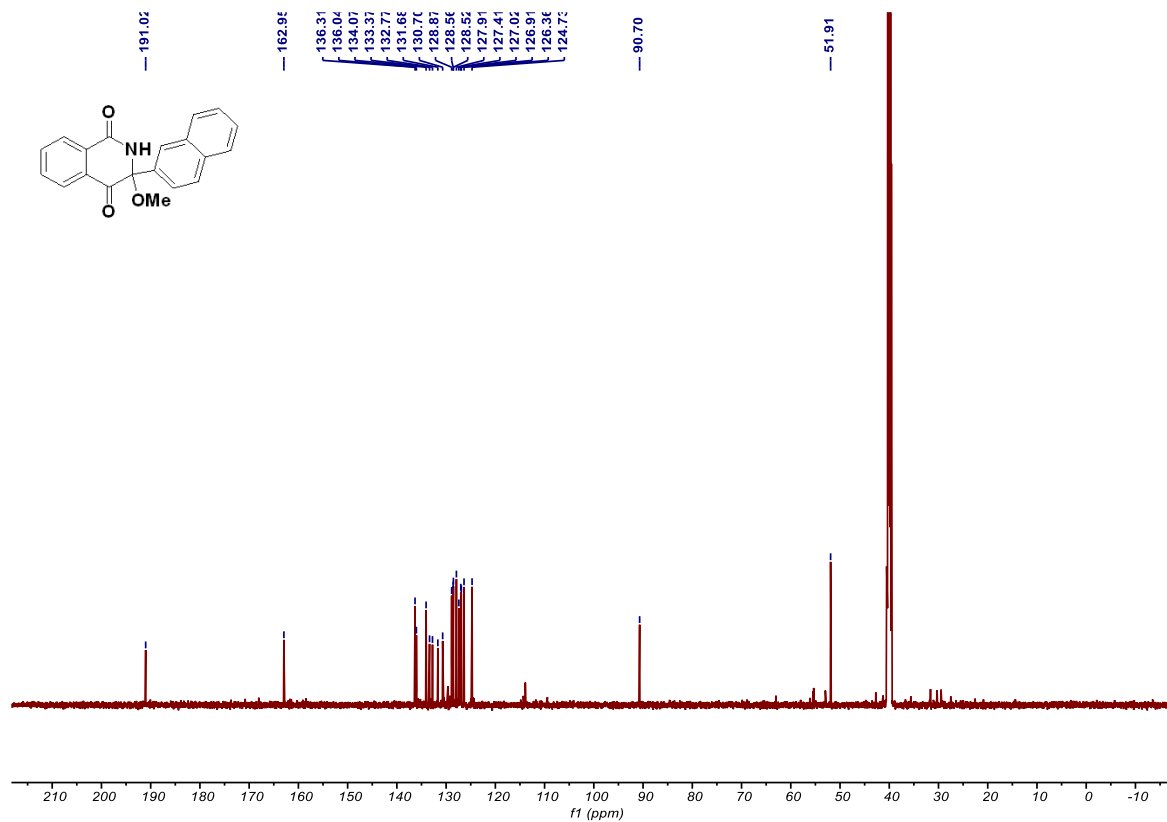

RS12 #3253 RT: 18.25 AV: 1 NL: 9.20E4  
T: FTMS + p ESI Full ms [100.0000-1500.0000]

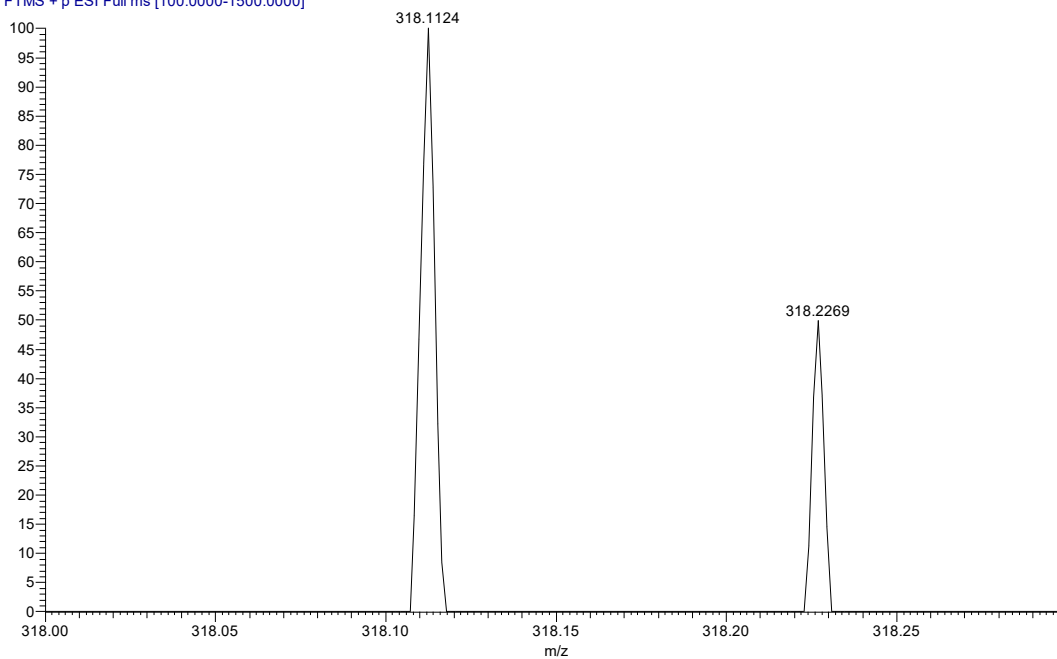

### 3-butyl-3-methoxy-2,3-dihydroisoquinoline-1,4-dione(34)

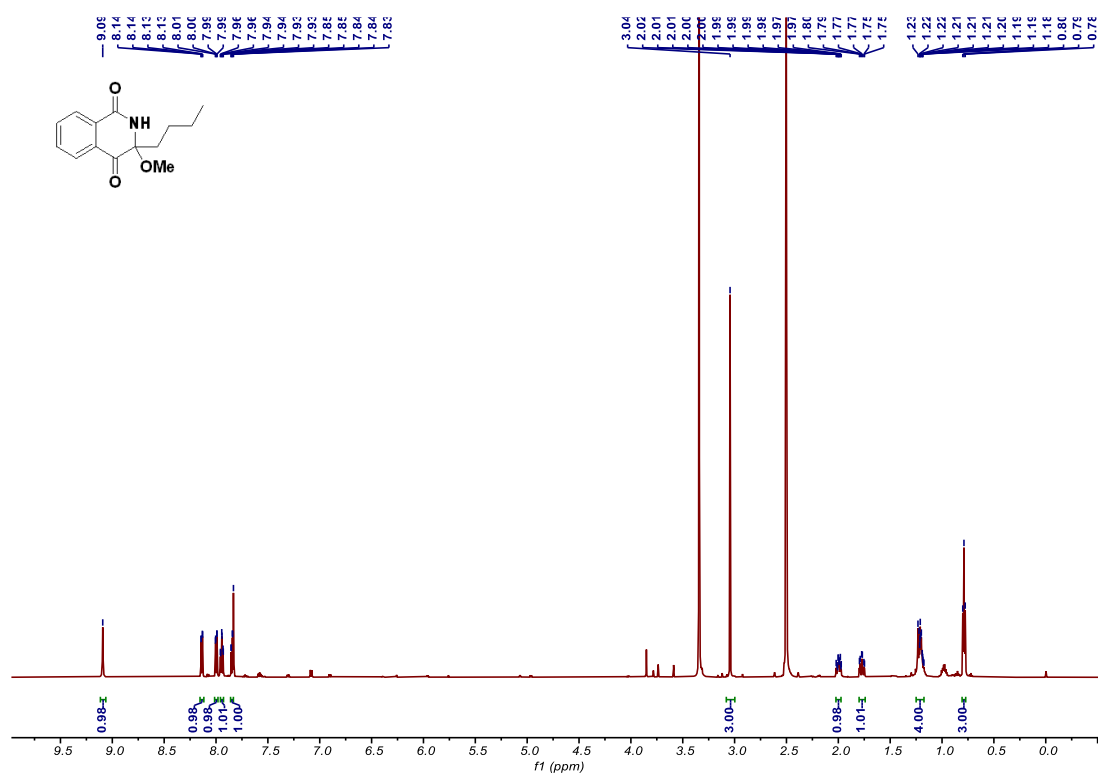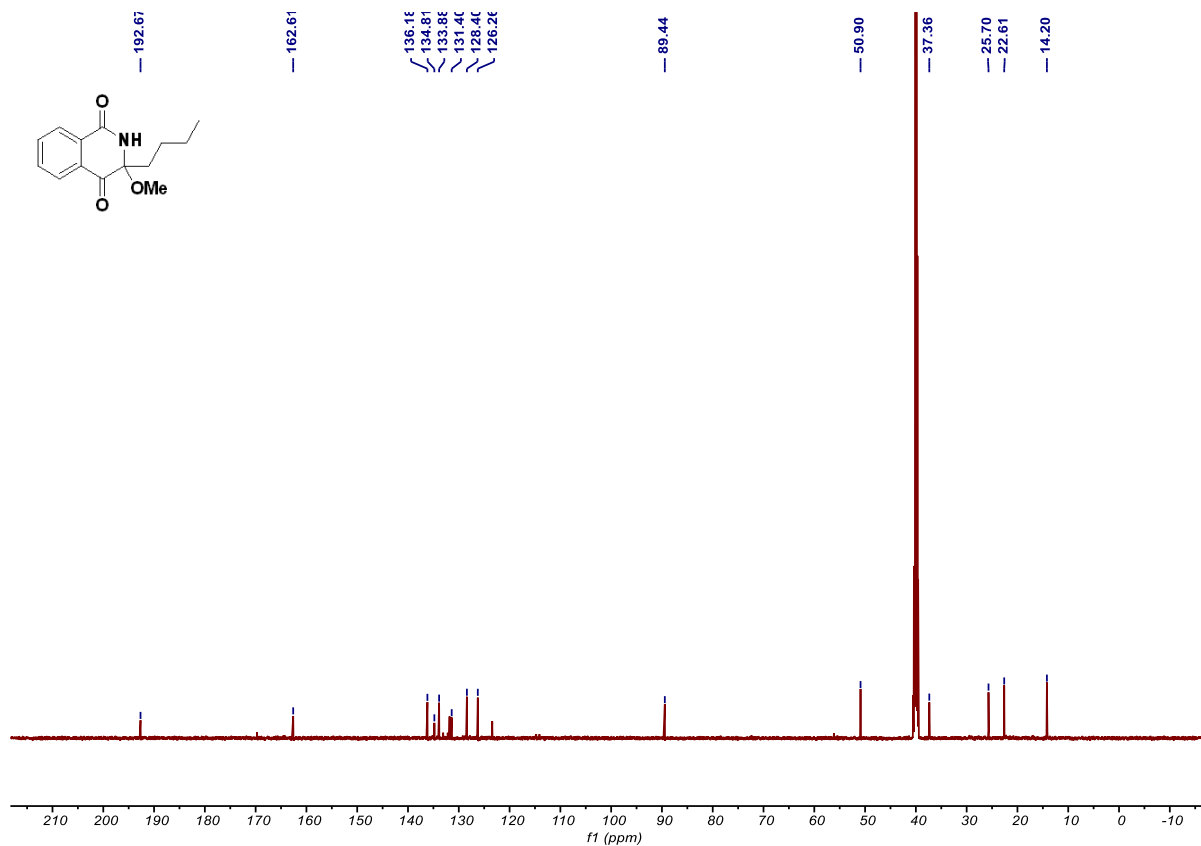



RS15 #192 RT: 1.08 AV: 1 NL: 1.77E6  
T: FTMS + p ESI Full ms [100.0000-1500.0000]

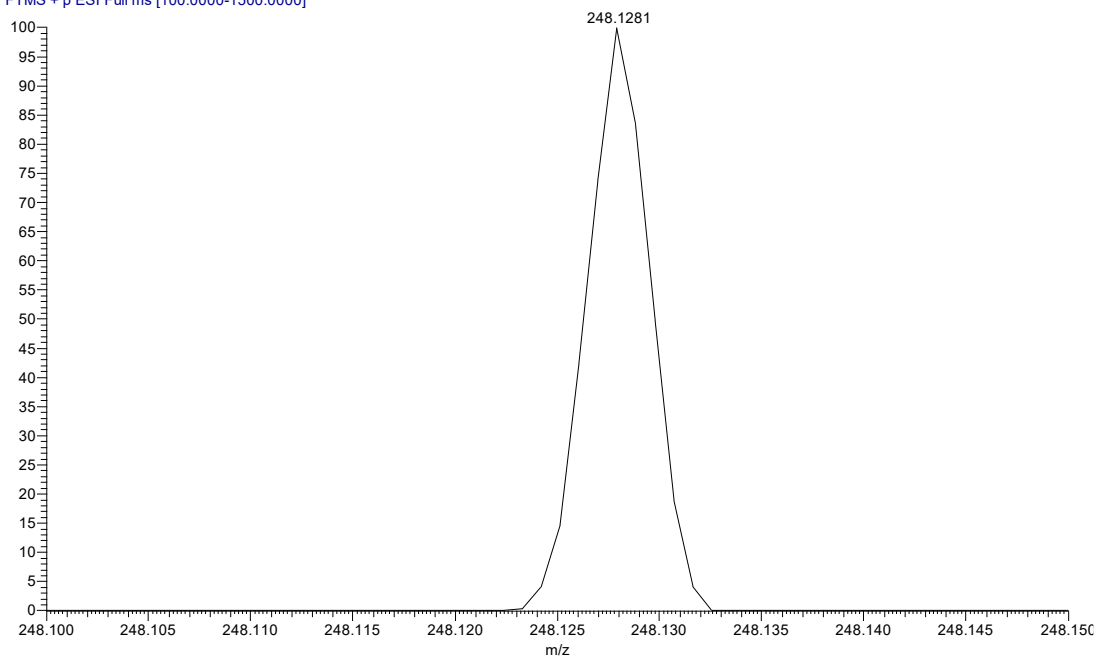

### 3-(1H-indol-3-yl)-3-phenyl-2,3-dihydroisoquinoline-1,4-dione (37)

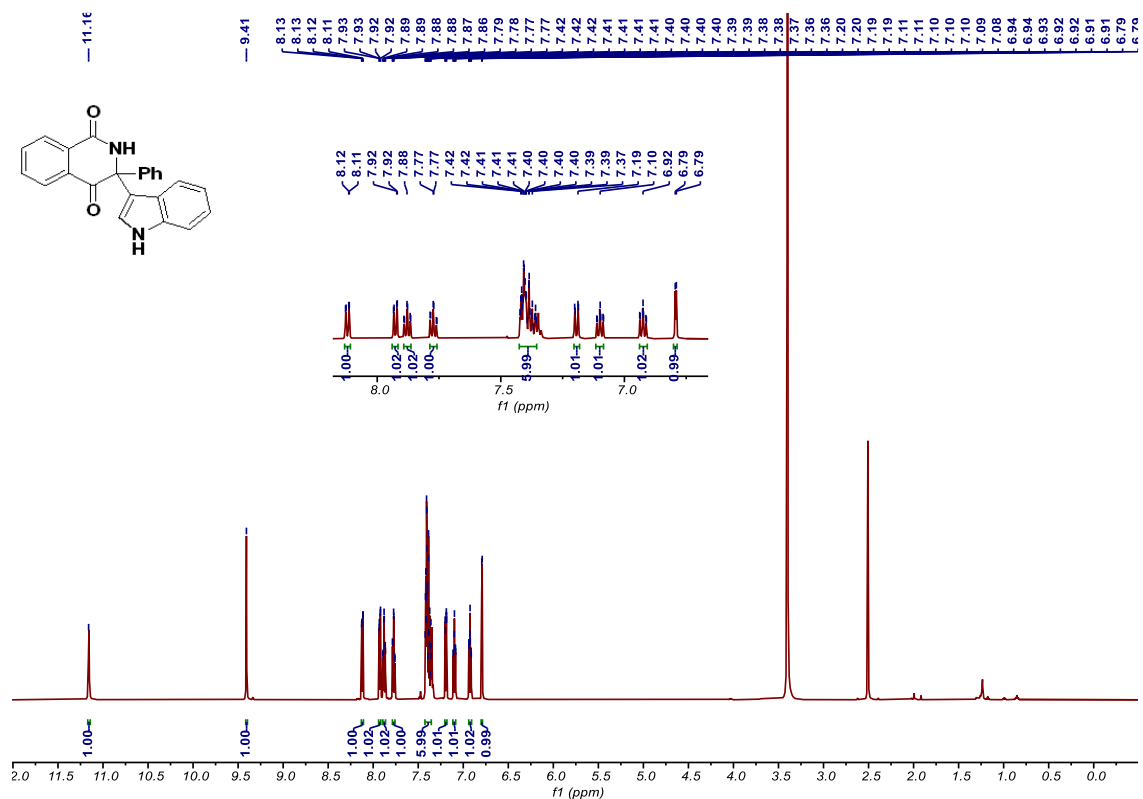

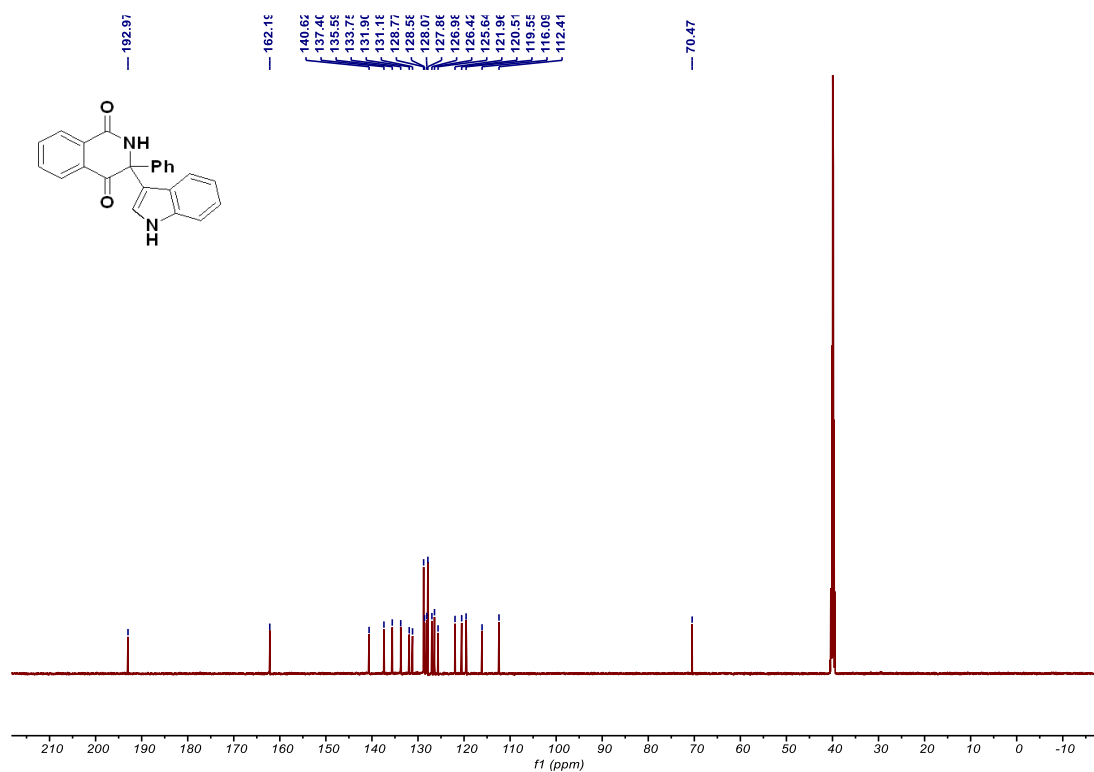

RS15 #339 RT: 1.87 AV: 1 NL: 3.42E6  
T: FTMS + p ESI Full ms [100.0000-1500.0000]

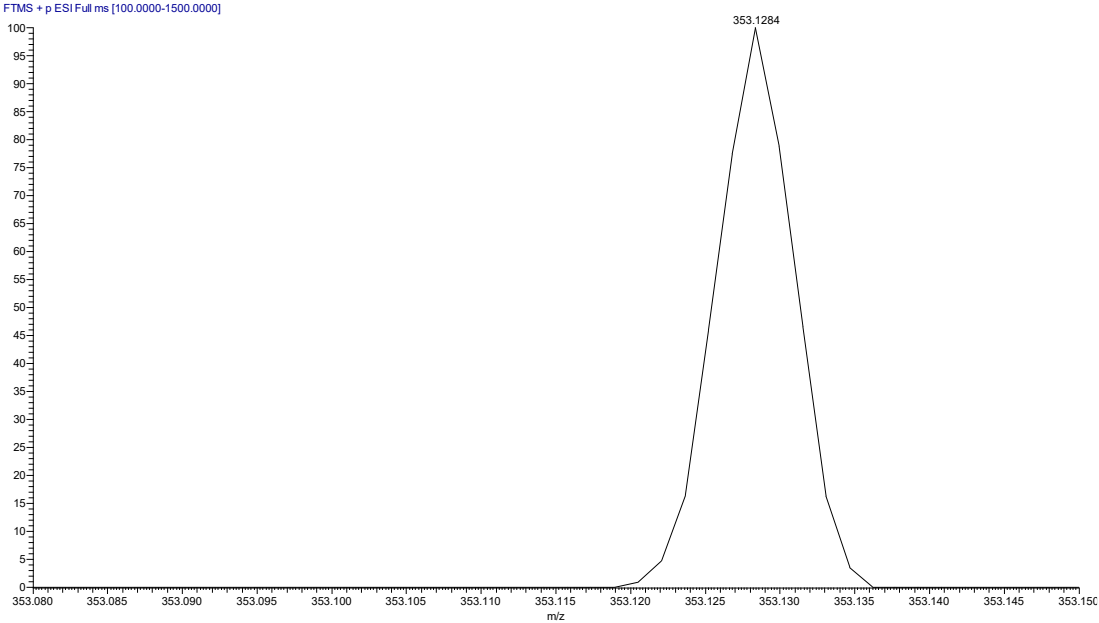

Chemical structure of 2-(4-methoxyphenyl)-1-phenylisoindolin-1-one is shown. The  $^1\text{H}$  NMR spectrum (CDCl<sub>3</sub>) displays peaks corresponding to the structure, with chemical shifts (ppm) and integration values indicated.

| Chemical Shift (ppm) | Integration |
|----------------------|-------------|
| 11.02                | 1.00        |
| 9.39                 | 0.98        |
| 8.10                 | 1.01        |
| 7.92                 | 0.99        |
| 7.91                 | 1.00        |
| 7.88                 | 0.99        |
| 7.85                 | 1.02        |
| 7.77                 | 0.99        |
| 7.75                 |             |
| 7.73                 |             |
| 7.72                 |             |
| 7.71                 |             |
| 7.70                 |             |
| 7.69                 |             |
| 7.68                 |             |
| 7.67                 |             |
| 7.66                 |             |
| 7.65                 |             |
| 7.64                 |             |
| 7.63                 |             |
| 7.62                 |             |
| 7.61                 |             |
| 7.60                 |             |
| 7.59                 |             |
| 7.58                 |             |
| 7.57                 |             |
| 7.56                 |             |
| 7.55                 |             |
| 7.54                 |             |
| 7.53                 |             |
| 7.52                 |             |
| 7.51                 |             |
| 7.50                 |             |
| 7.49                 |             |
| 7.48                 |             |
| 7.47                 |             |
| 7.46                 |             |
| 7.45                 |             |
| 7.44                 |             |
| 7.43                 |             |
| 7.42                 |             |
| 7.41                 |             |
| 7.40                 |             |
| 7.39                 |             |
| 7.38                 |             |
| 7.37                 |             |
| 7.36                 |             |
| 7.35                 |             |
| 7.34                 |             |
| 7.33                 |             |
| 7.32                 |             |
| 7.31                 |             |
| 7.30                 |             |
| 7.29                 |             |
| 7.28                 |             |
| 7.27                 |             |
| 7.26                 |             |
| 7.25                 |             |
| 7.24                 |             |
| 7.23                 |             |
| 7.22                 |             |
| 7.21                 |             |
| 7.20                 |             |
| 7.19                 |             |
| 7.18                 |             |
| 7.17                 |             |
| 7.16                 |             |
| 7.15                 |             |
| 7.14                 |             |
| 7.13                 |             |
| 7.12                 |             |
| 7.11                 |             |
| 7.10                 |             |
| 7.09                 |             |
| 7.08                 |             |
| 7.07                 |             |
| 7.06                 |             |
| 7.05                 |             |
| 7.04                 |             |
| 7.03                 |             |
| 7.02                 |             |
| 7.01                 |             |
| 7.00                 |             |
| 6.99                 |             |
| 6.98                 |             |
| 6.97                 |             |
| 6.96                 |             |
| 6.95                 |             |
| 6.94                 |             |
| 6.93                 |             |
| 6.92                 |             |
| 6.91                 |             |
| 6.90                 |             |
| 6.89                 |             |
| 6.88                 |             |
| 6.87                 |             |
| 6.86                 |             |
| 6.85                 |             |
| 6.84                 |             |
| 6.83                 |             |
| 6.82                 |             |
| 6.81                 |             |
| 6.80                 |             |
| 6.79                 |             |
| 6.78                 |             |
| 6.77                 |             |
| 6.76                 |             |
| 6.75                 |             |
| 6.74                 |             |
| 6.73                 |             |
| 6.72                 |             |
| 6.71                 |             |
| 6.70                 |             |
| 6.69                 |             |
| 6.68                 |             |
| 6.67                 |             |
| 6.66                 |             |
| 6.65                 |             |
| 6.64                 |             |
| 6.63                 |             |
| 6.62                 |             |
| 6.61                 |             |
| 6.60                 |             |
| 6.59                 |             |
| 6.58                 |             |
| 6.57                 |             |
| 6.56                 |             |
| 6.55                 |             |
| 6.54                 |             |
| 6.53                 |             |
| 6.52                 |             |
| 6.51                 |             |
| 6.50                 |             |
| 6.49                 |             |
| 6.48                 |             |
| 6.47                 |             |
| 6.46                 |             |
| 6.45                 |             |
| 6.44                 |             |
| 6.43                 |             |
| 6.42                 |             |
| 6.41                 |             |
| 6.40                 |             |
| 6.39                 |             |
| 6.38                 |             |
| 6.37                 |             |
| 6.36                 |             |
| 6.35                 |             |
| 6.34                 |             |
| 6.33                 |             |
| 6.32                 |             |
| 6.31                 |             |
| 6.30                 |             |
| 6.29                 |             |
| 6.28                 |             |
| 6.27                 |             |
| 6.26                 |             |
| 6.25                 |             |
| 6.24                 |             |
| 6.23                 |             |
| 6.22                 |             |
| 6.21                 |             |
| 6.20                 |             |
| 6.19                 |             |
| 6.18                 |             |
| 6.17                 |             |
| 6.16                 |             |
| 6.15                 |             |
| 6.14                 |             |
| 6.13                 |             |
| 6.12                 |             |
| 6.11                 |             |
| 6.10                 |             |
| 6.09                 |             |

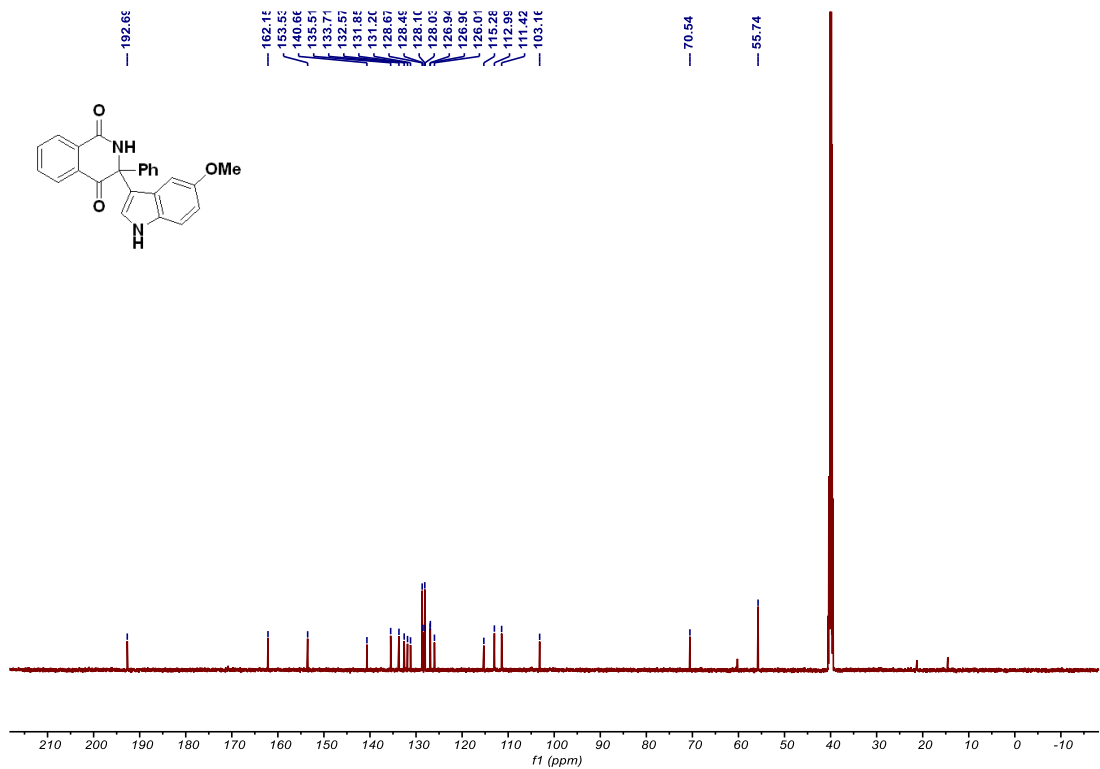

[illegible]

RS15 #305 RT: 1.67 AV: 1 NL: 5.68E5  
T: FTMS + p ESI Full ms [100.0000-1500.0000]

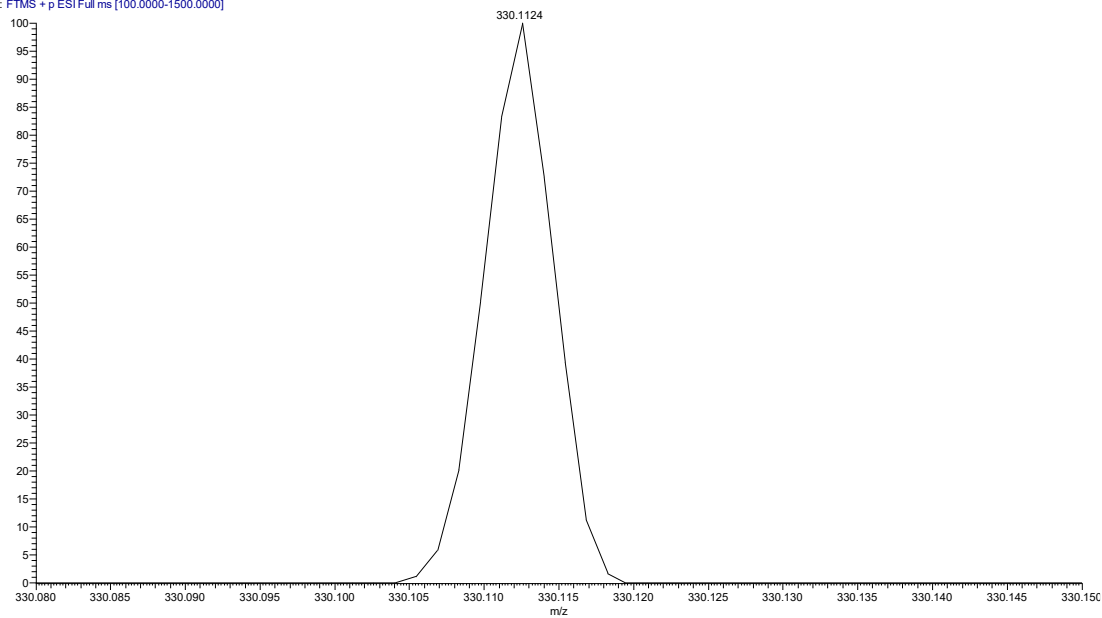

### 3-(4-hydroxy-3,5-dimethylphenyl)-3-phenyl-2,3-dihydroisoquinoline-1,4-dione (40)

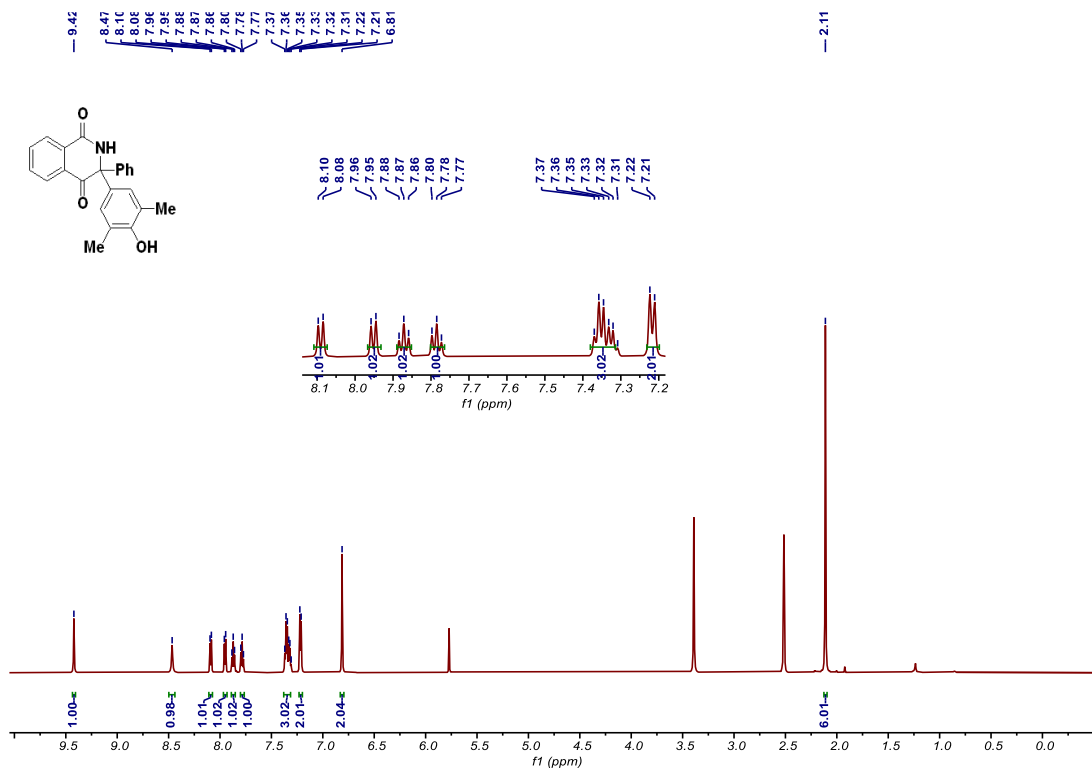

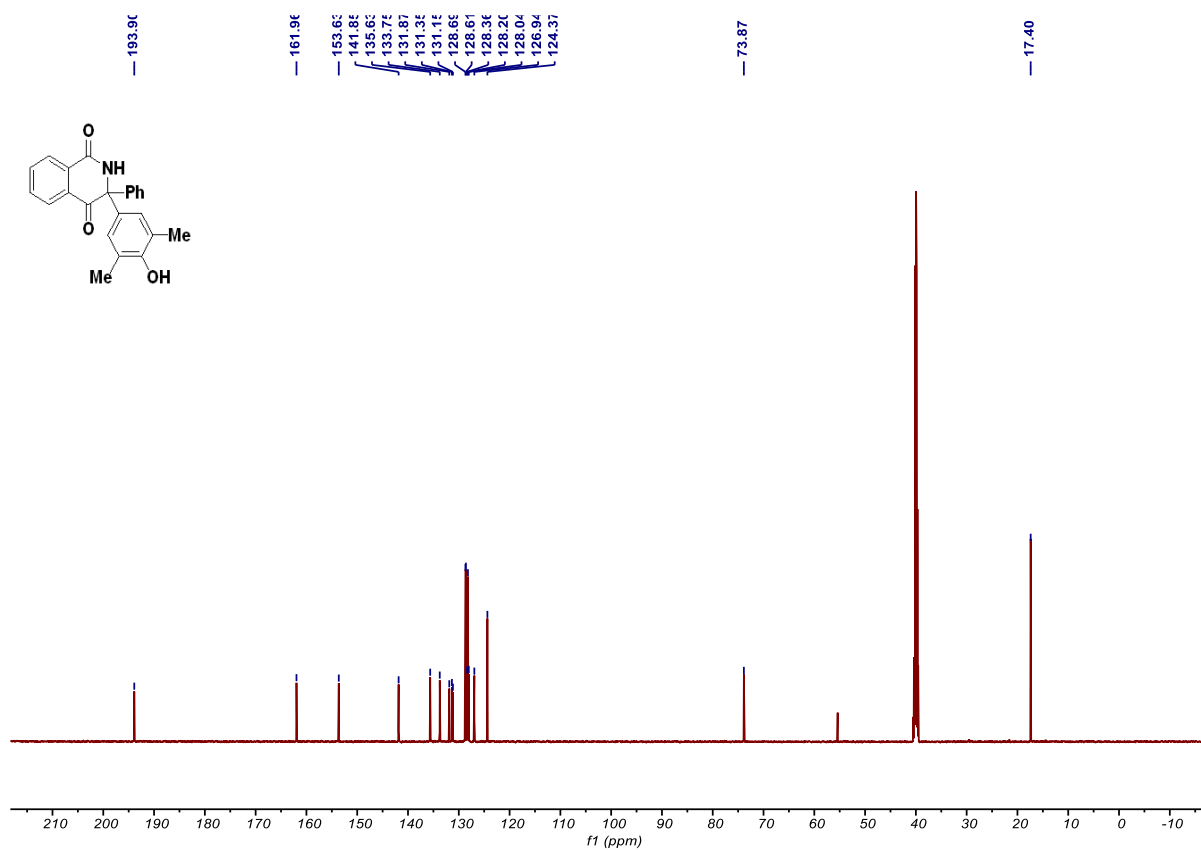

RS16 #3600 RT: 19.96 AV: 1 NL: 3.26E6  
T: FTMS + p ESI Full ms [100.0000-1500.0000]

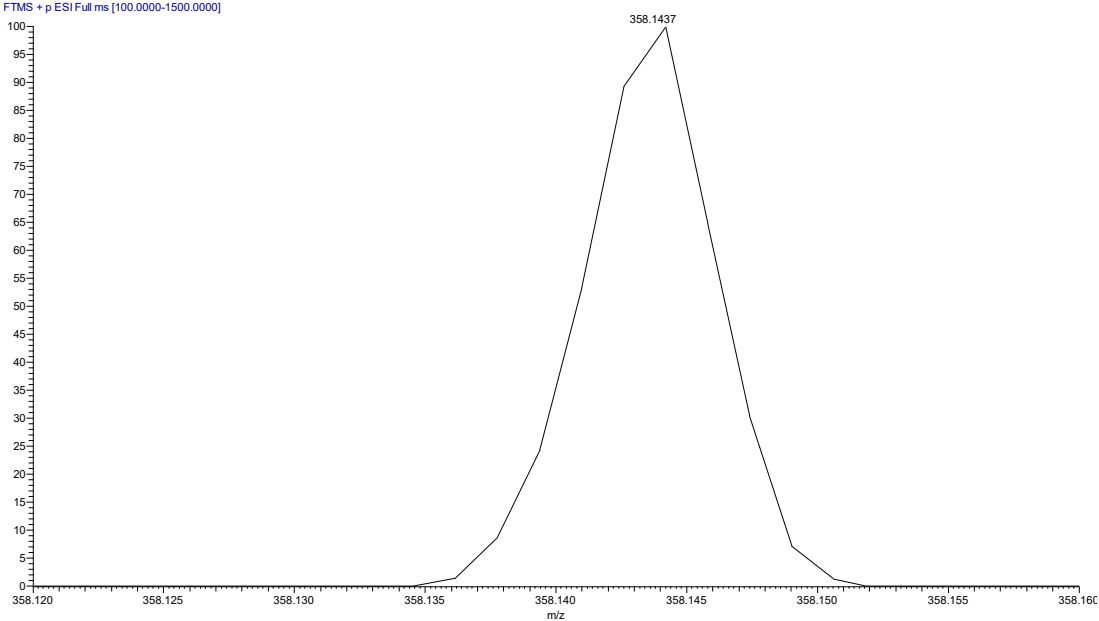

### 3-(4-(methylamino)phenyl)-3-phenyl-2,3-dihydroisoquinoline-1,4-dione (41)

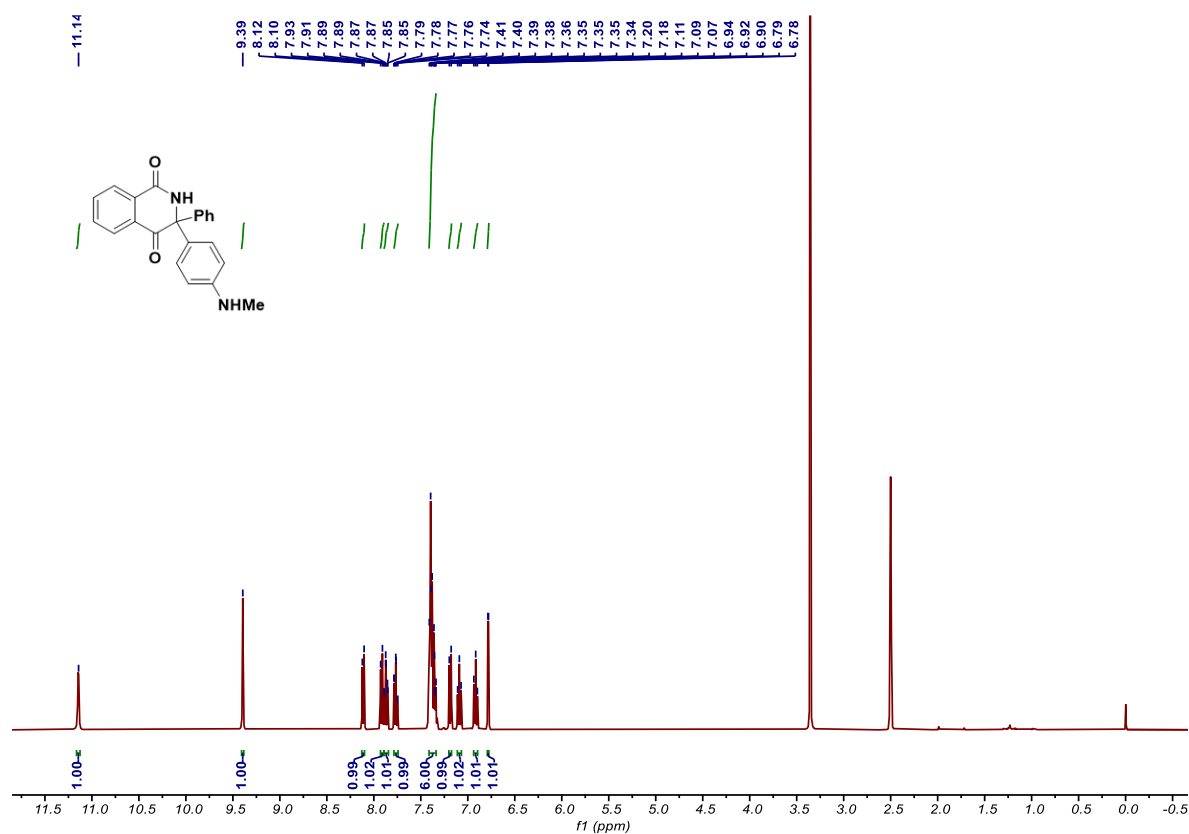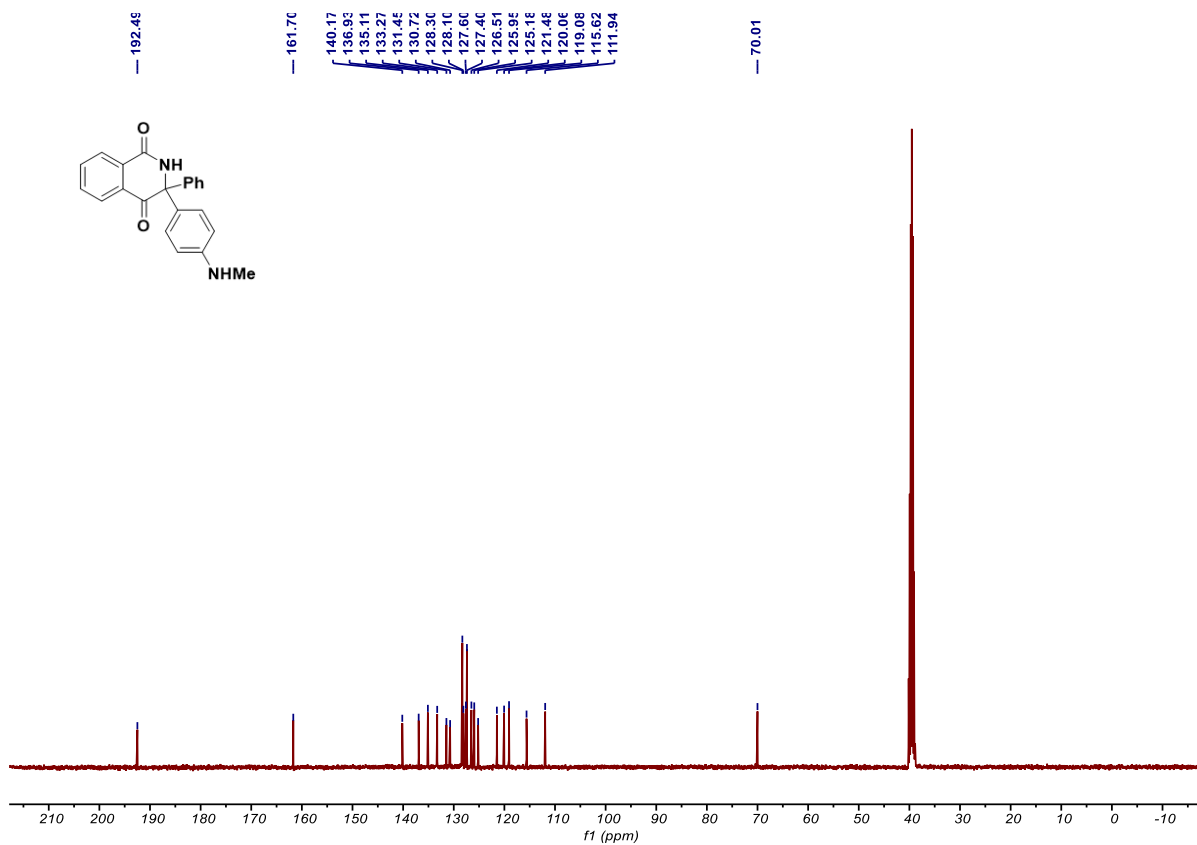

RS16 #3179 RT: 17.75 AV: 1 NL: 3.30E6  
T: FTMS + p ESI Full ms [100.0000-1500.0000]

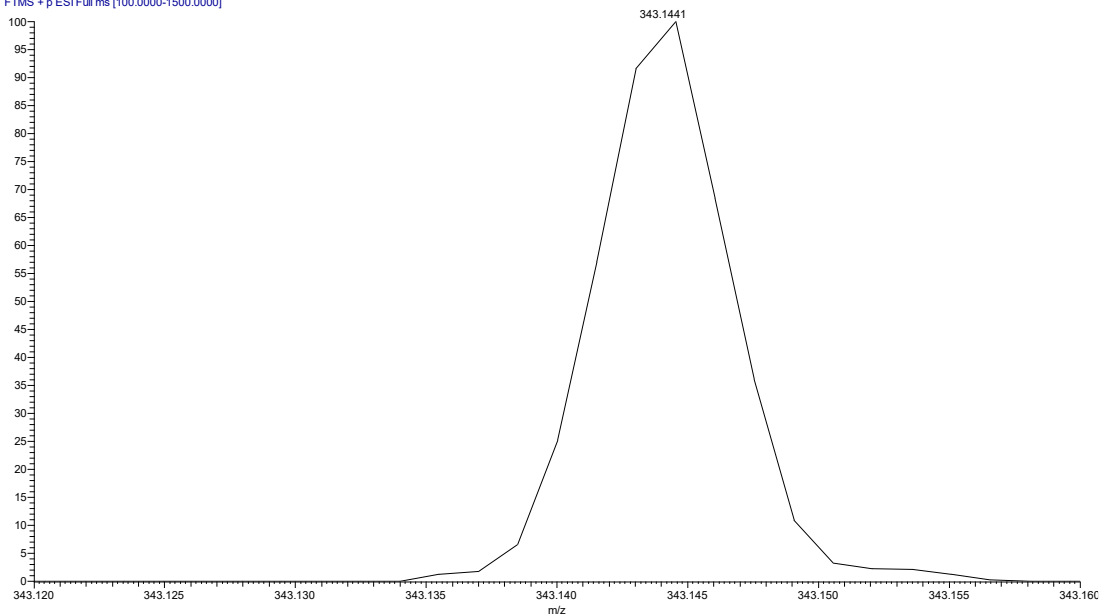

### 3-(5-methylfuran-2-yl)-3-phenyl-2,3-dihydroisoquinoline-1,4-dione (42)

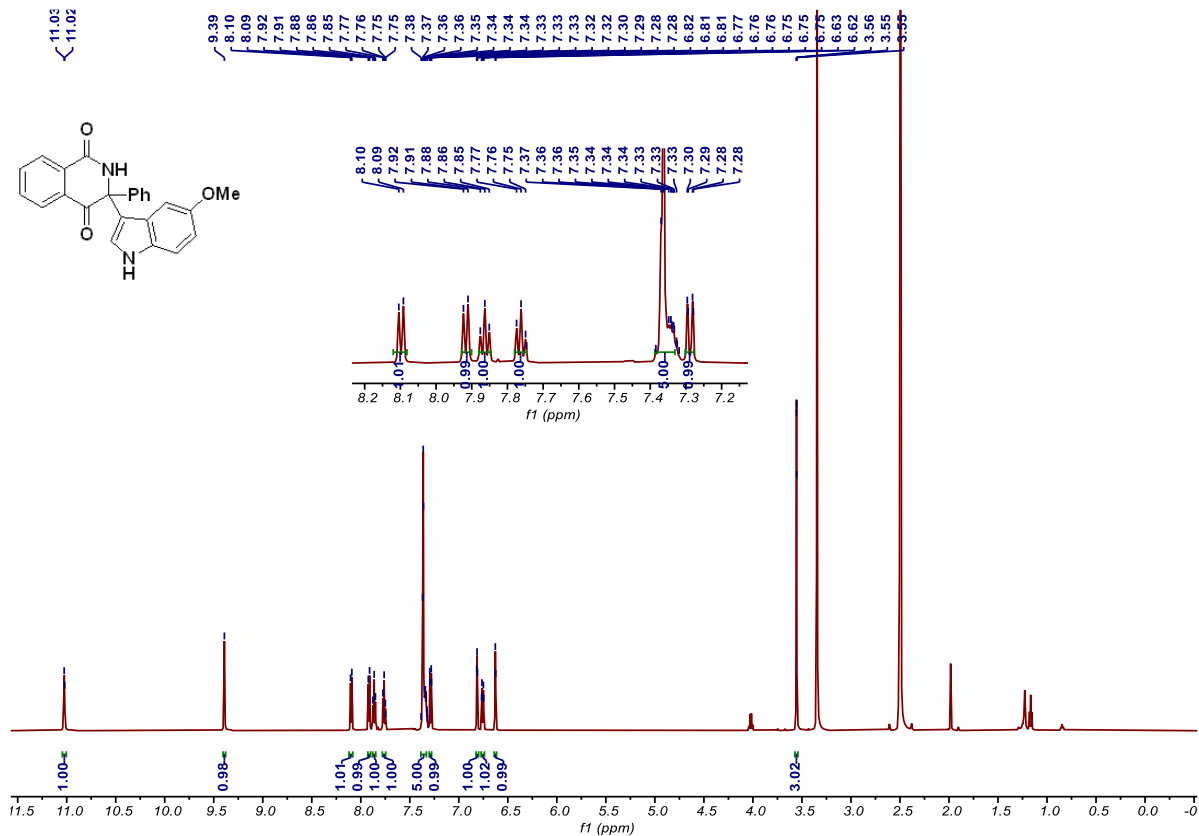



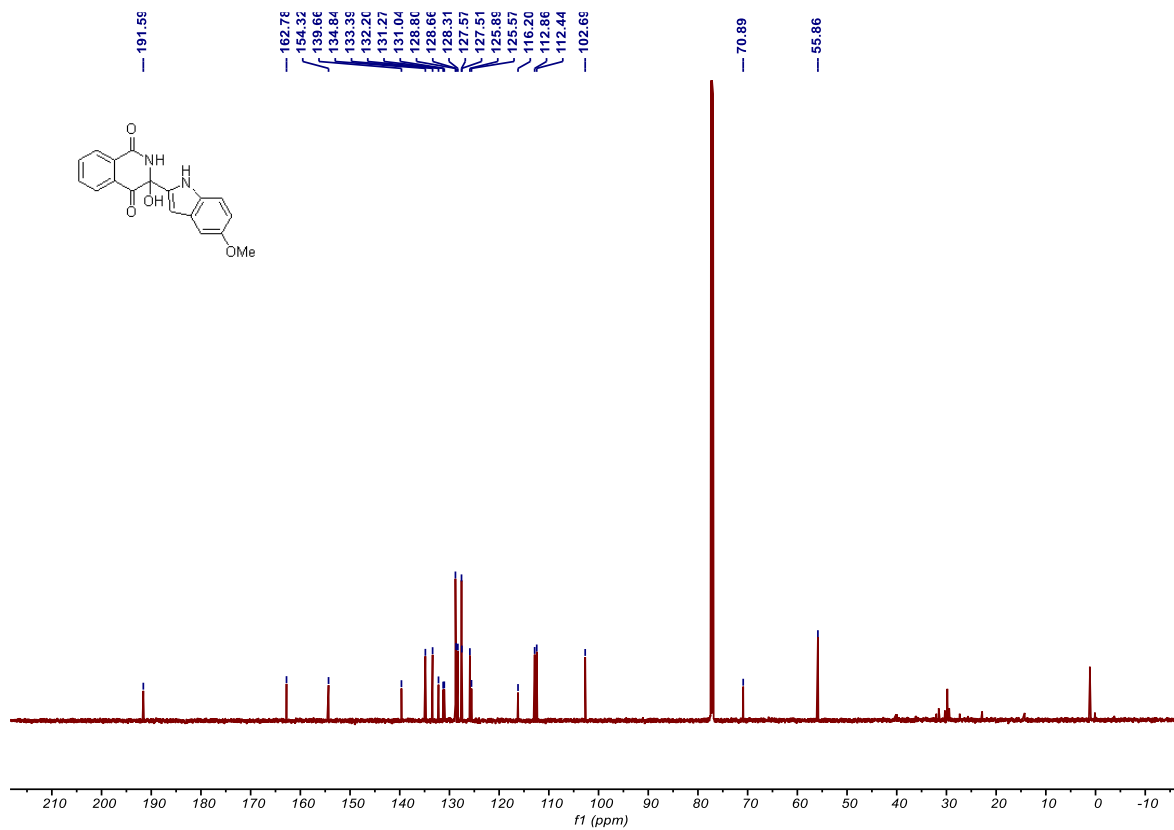

RS16 #3404 RT: 18.94 AV: 1 NL: 1.30E6  
T: FTMS + p ESI Full ms [100.0000-1500.0000]

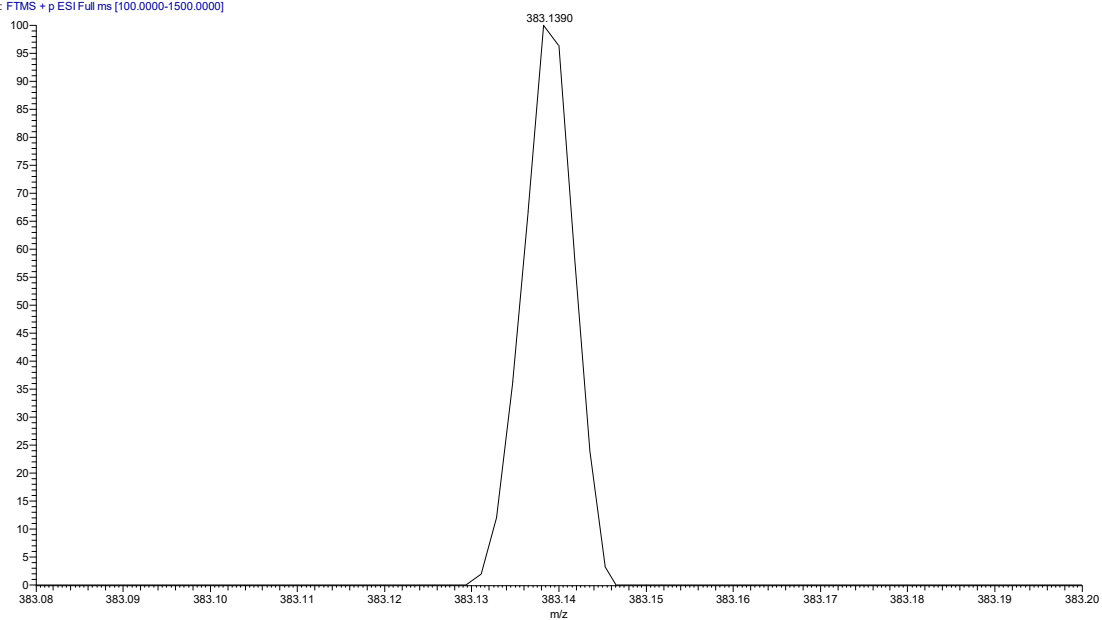

**<sup>1</sup>H NMR Spectrum (Top):**

Chemical structure: CCOC(=O)CS(C1=CC=CC=C1)C2=CC(=O)NC(=O)c3ccccc32

Chemical shift range: 0.98 to 8.15 ppm.

Integration values (from left to right): 0.98, 1.00, 1.01, 1.02, 0.95, 0.95, 1.00, 0.99, 1.02, 3.00.

**<sup>13</sup>C NMR Spectrum (Bottom):**

Chemical shift range: 14.12 to 188.30 ppm.

Peak labels (from left to right): 188.30, 169.16, 161.71, 137.85, 135.96, 134.04, 131.25, 130.64, 129.41, 129.12, 128.16, 127.71, 127.37, 74.97, 61.39, 33.48, 14.12.

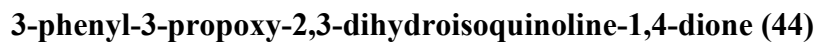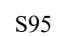

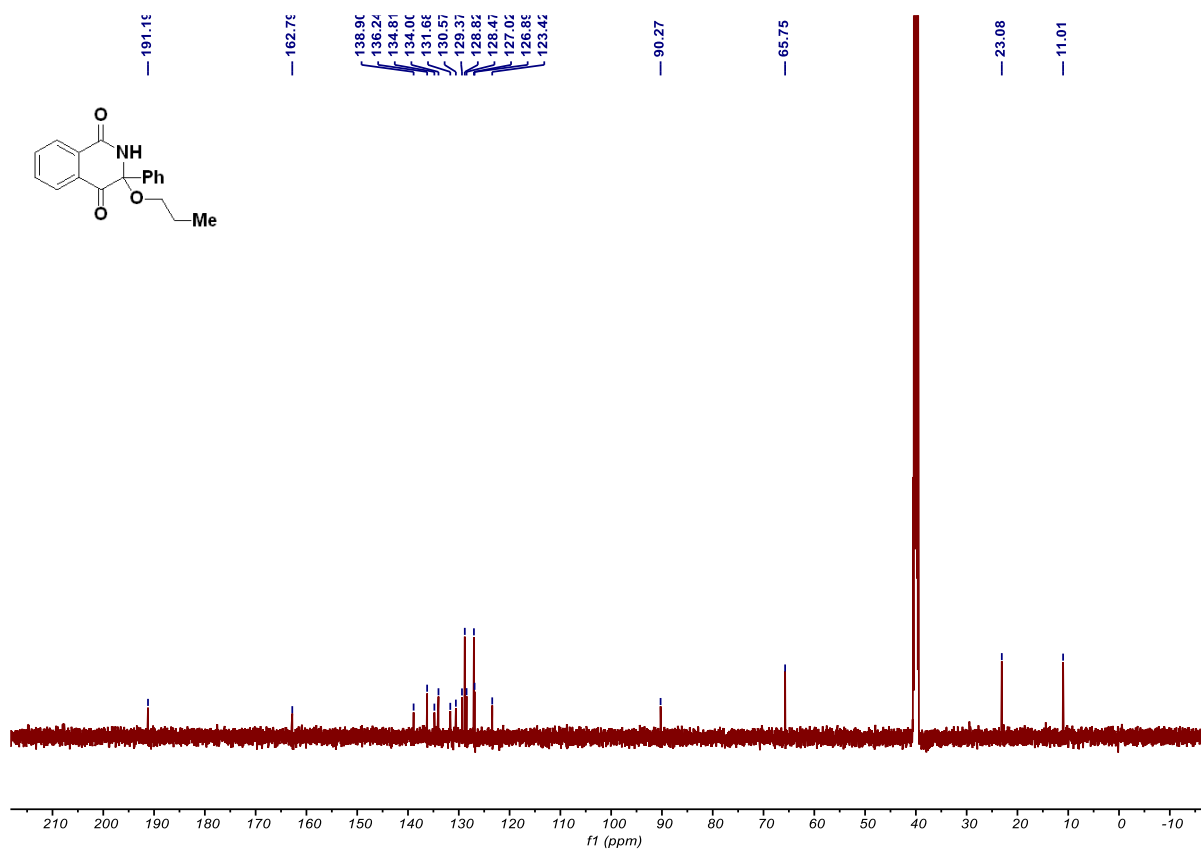

RS16 #3024 RT: 16.94 AV: 1 NL: 1.36E5  
T: FTMS + p ESI Full ms [100.0000-1500.0000]

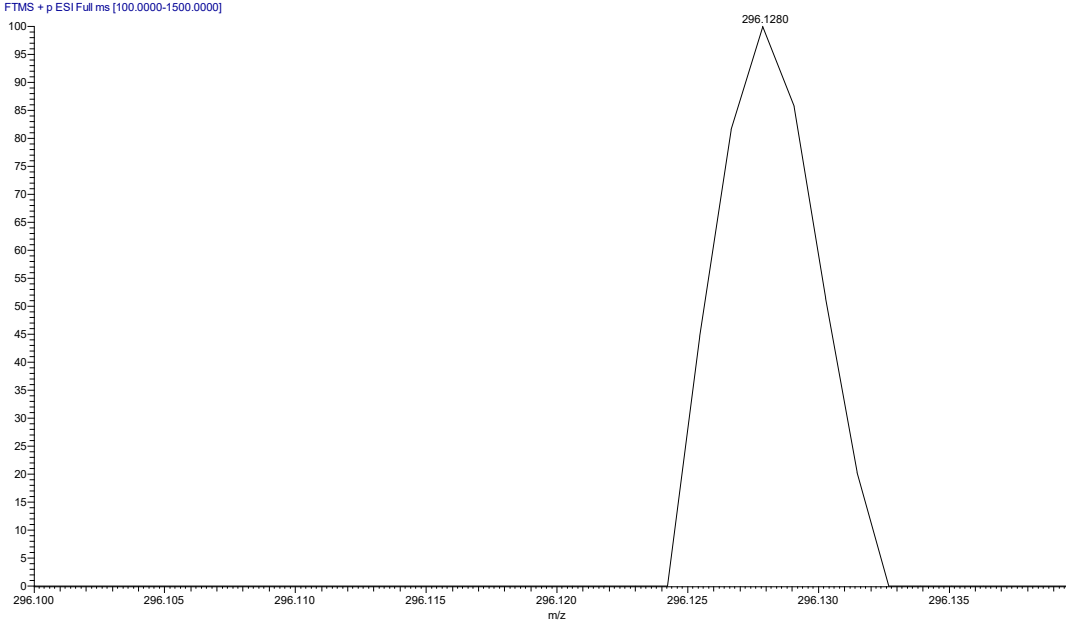

### 3-hydroxy-3-phenyl-2,3-dihydroisoquinoline-1,4-dione (45)

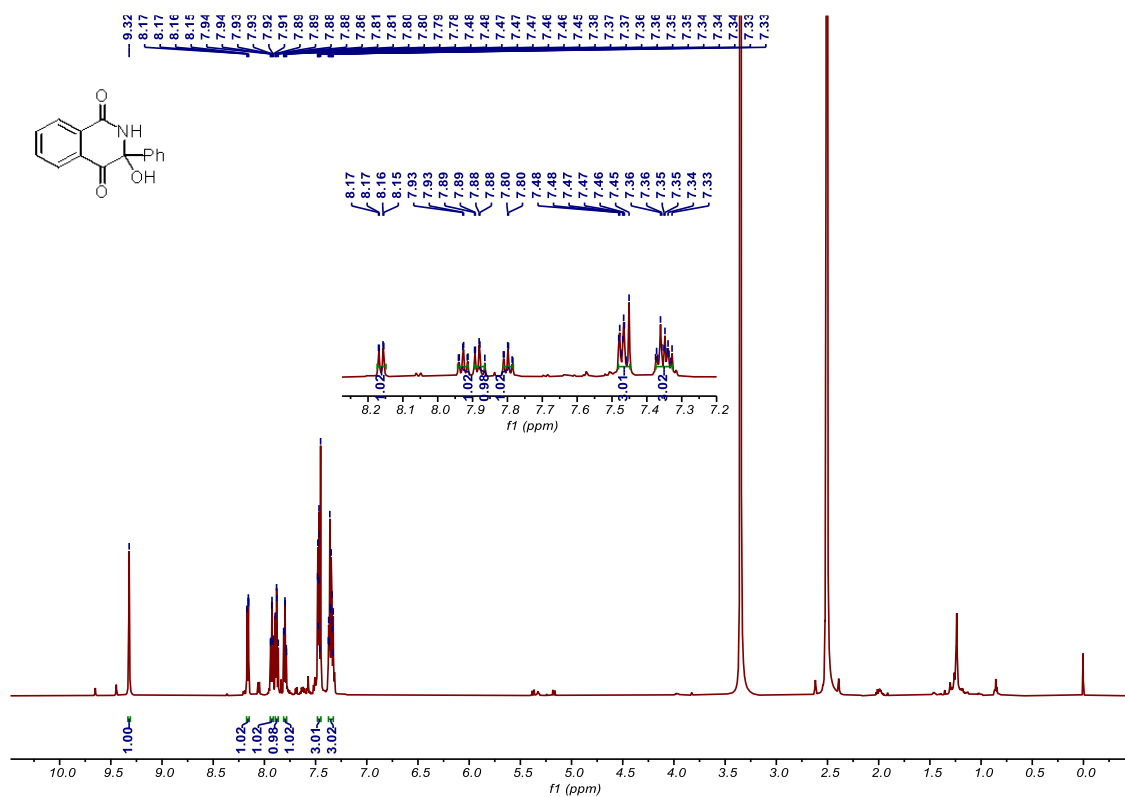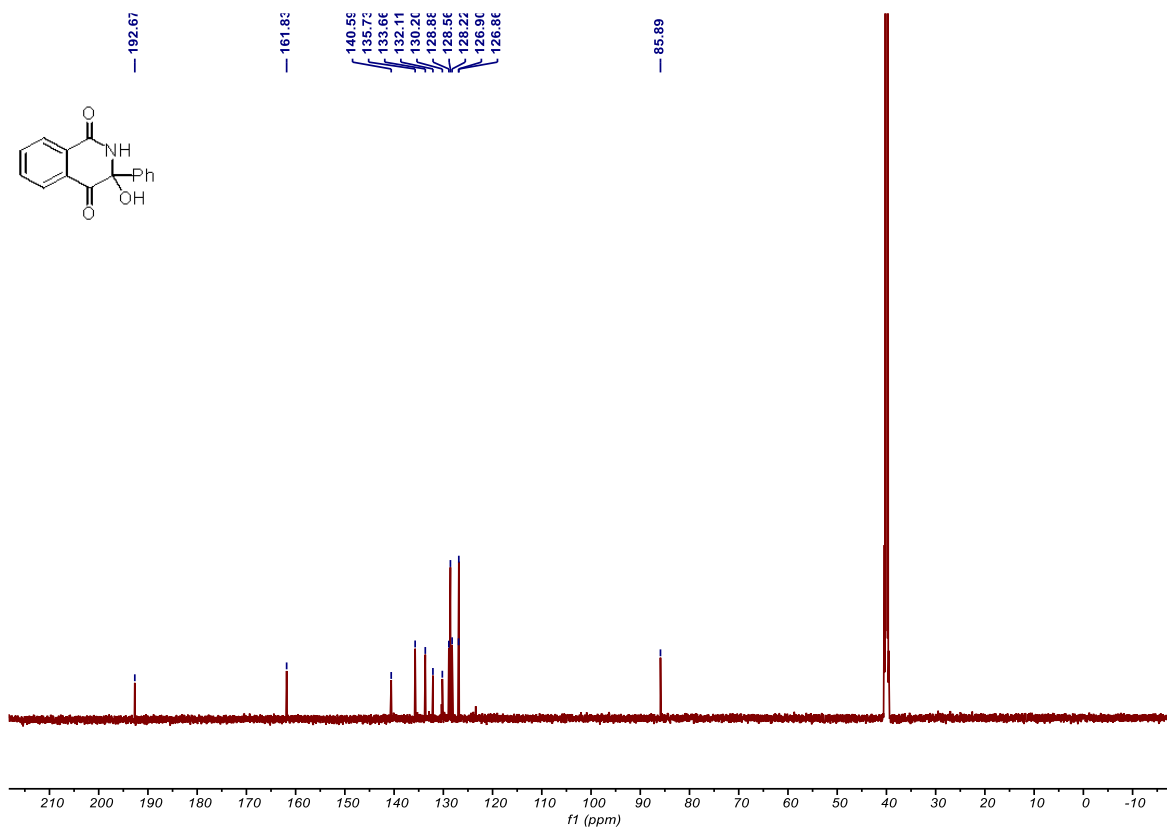



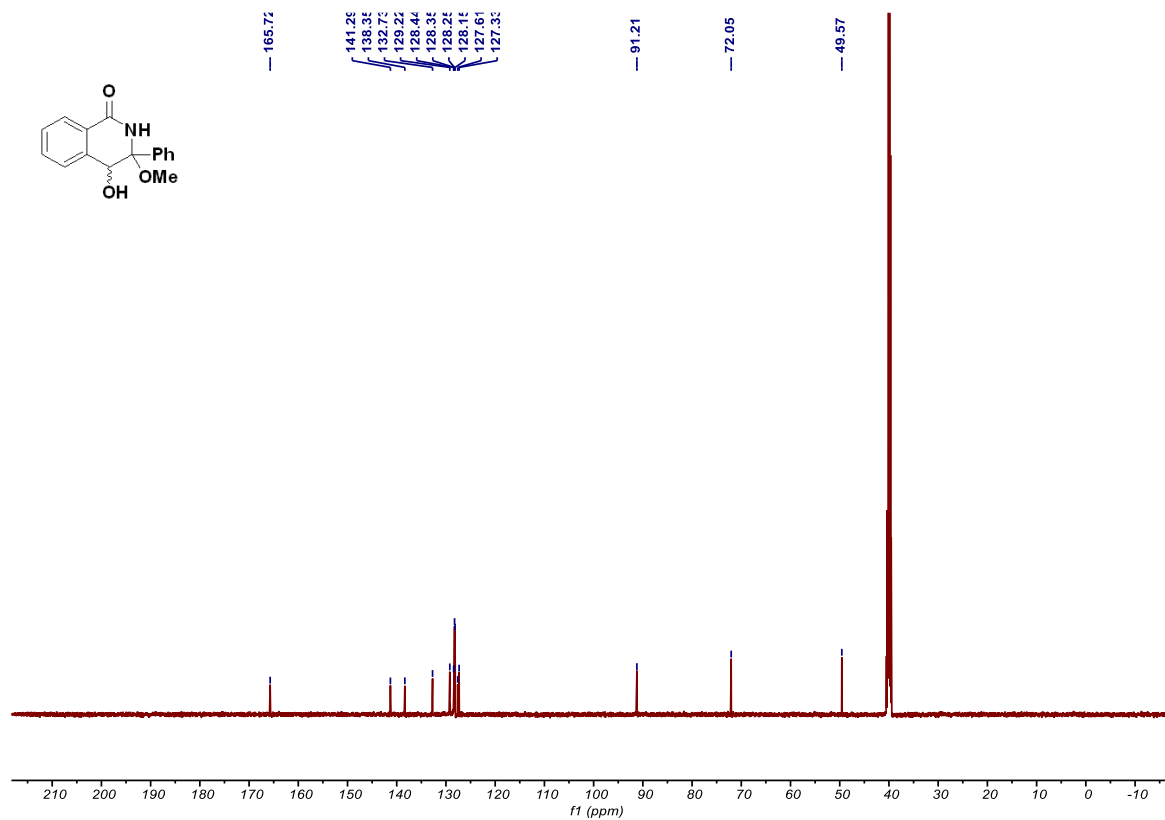

RS15 #882 RT: 4.90 AV: 1 NL: 5.14E5  
T: FTMS + p ESI Full ms [100.0000-1500.0000]

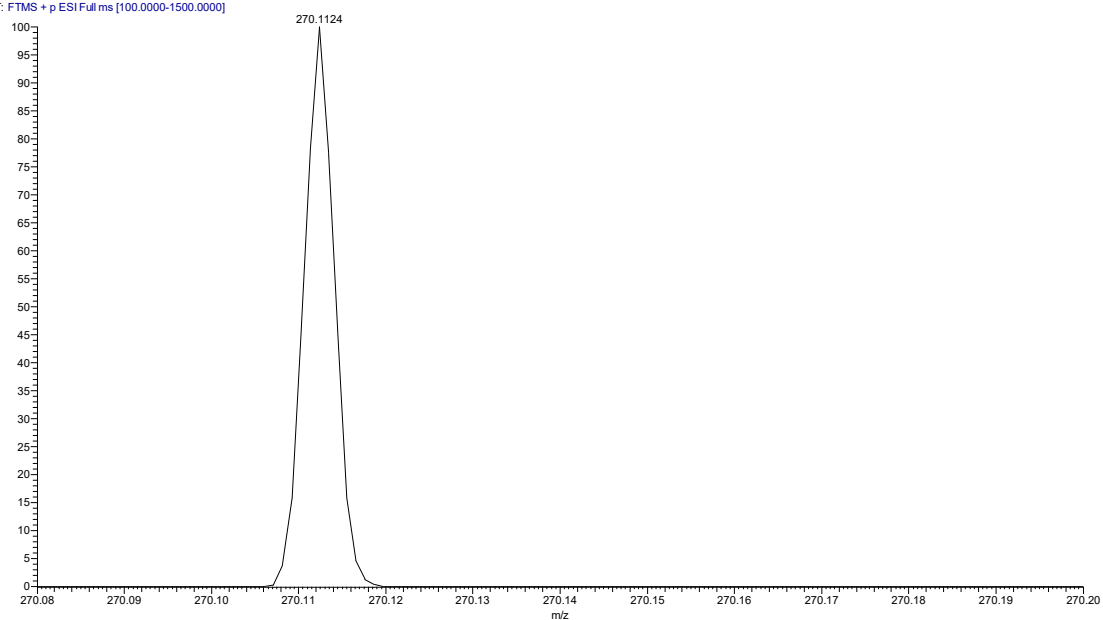

### 3-methoxy-2-methyl-3-phenyl-2,3-dihydroisoquinoline-1,4-dione (47)

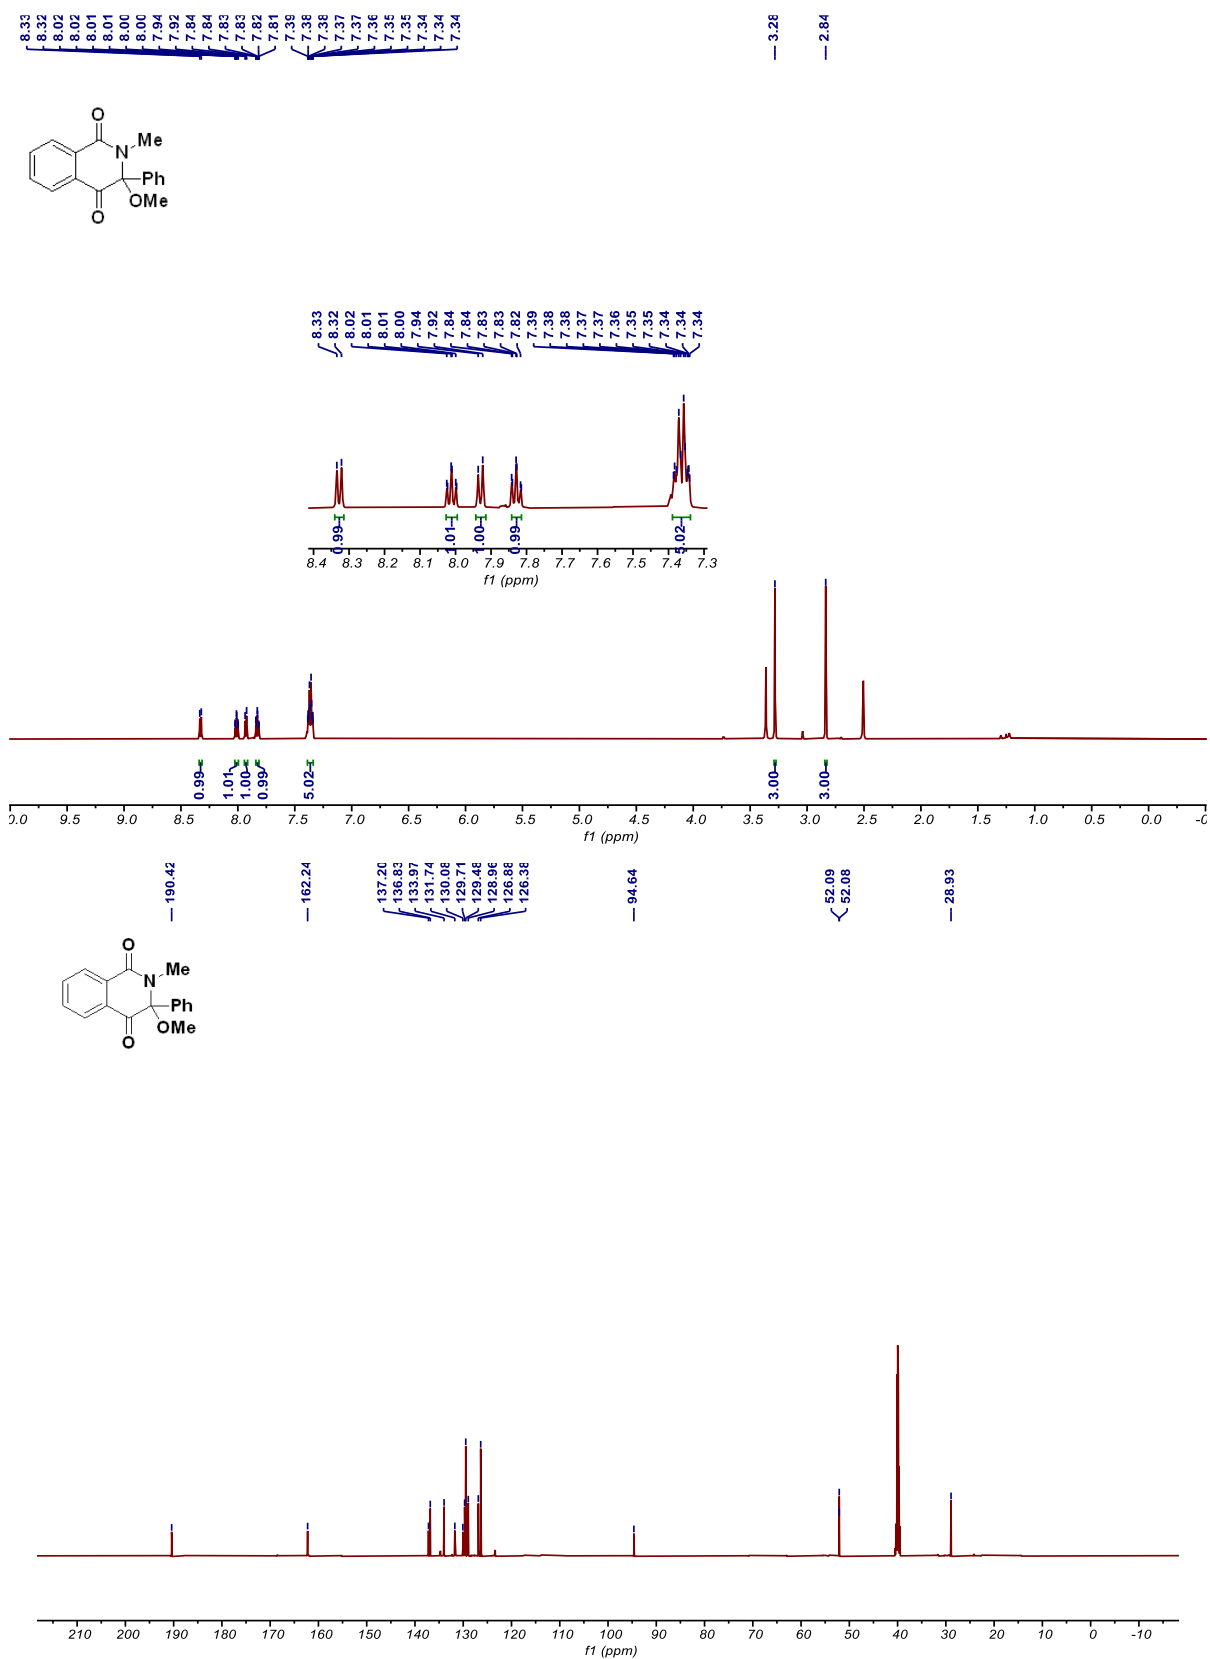



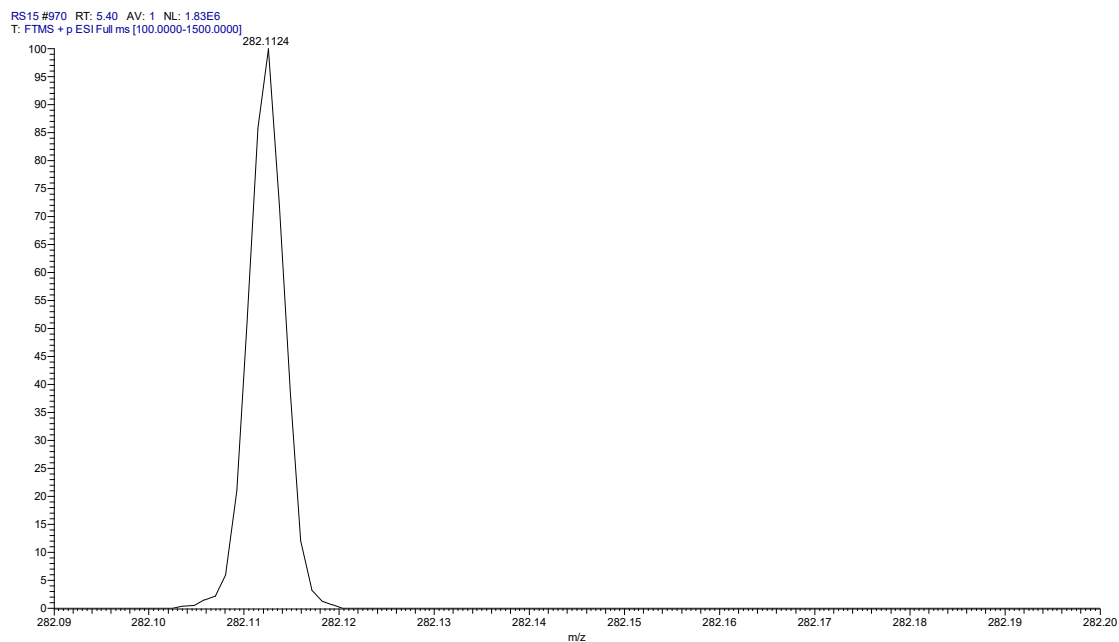

### 3-chloro-3-phenyl-2,3-dihydroisoquinoline-1,4-dione (48)

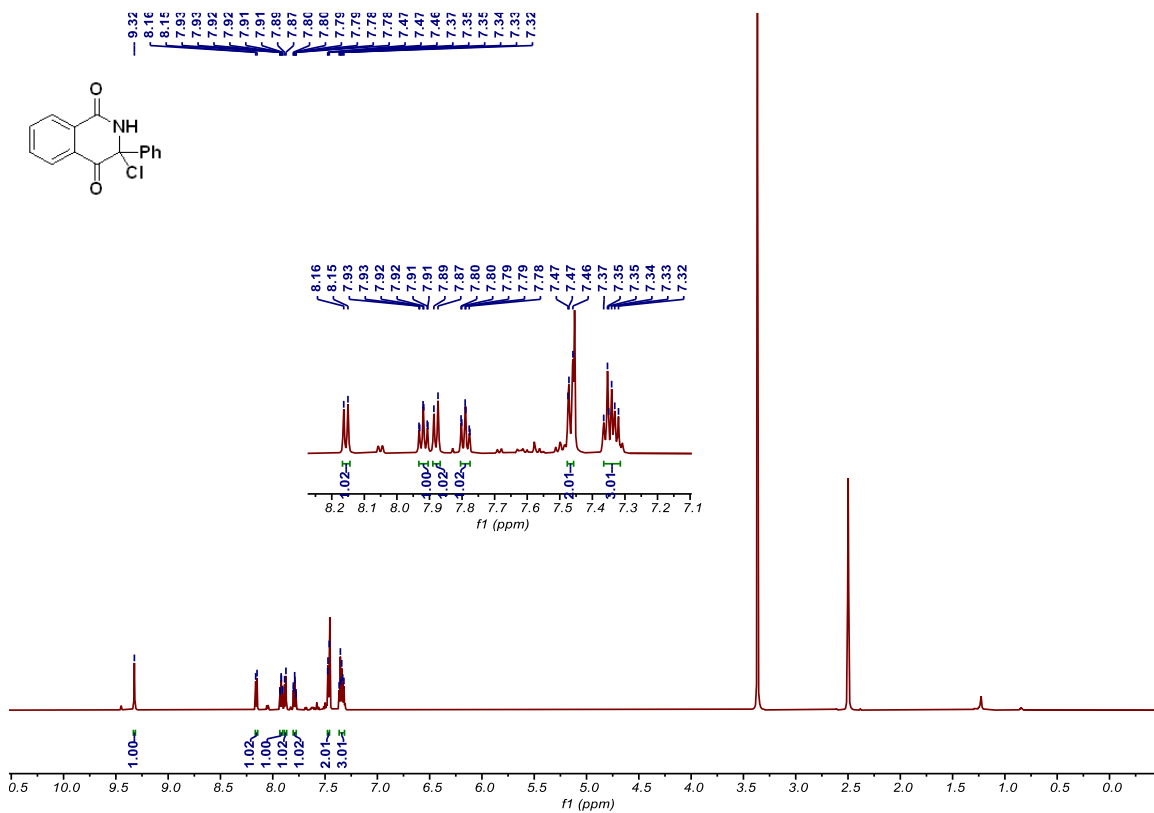

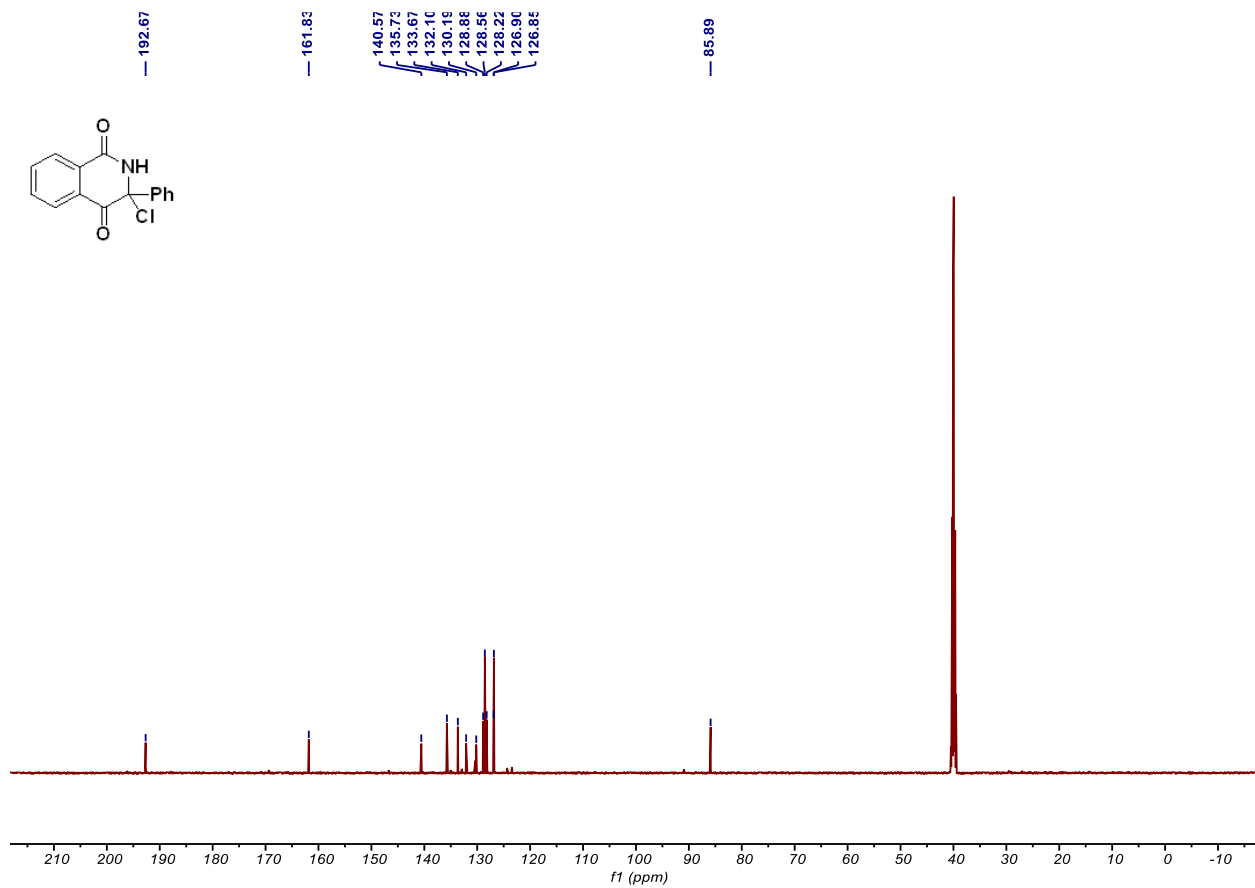

RS15 #3800 RT: 21.61 AV: 1 NL: 2.43E4  
T: FTMS + p ESI Full ms [100.0000-1500.0000]

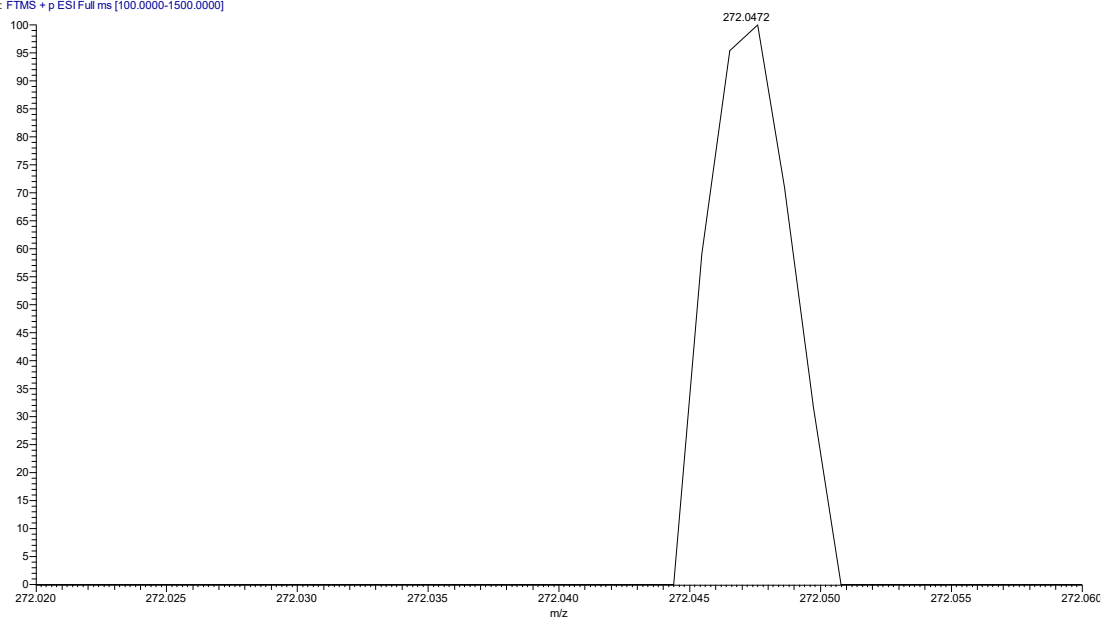

### 3-(nitromethyl)-3-phenyl-2,3-dihydroisoquinoline-1,4-dione (49)

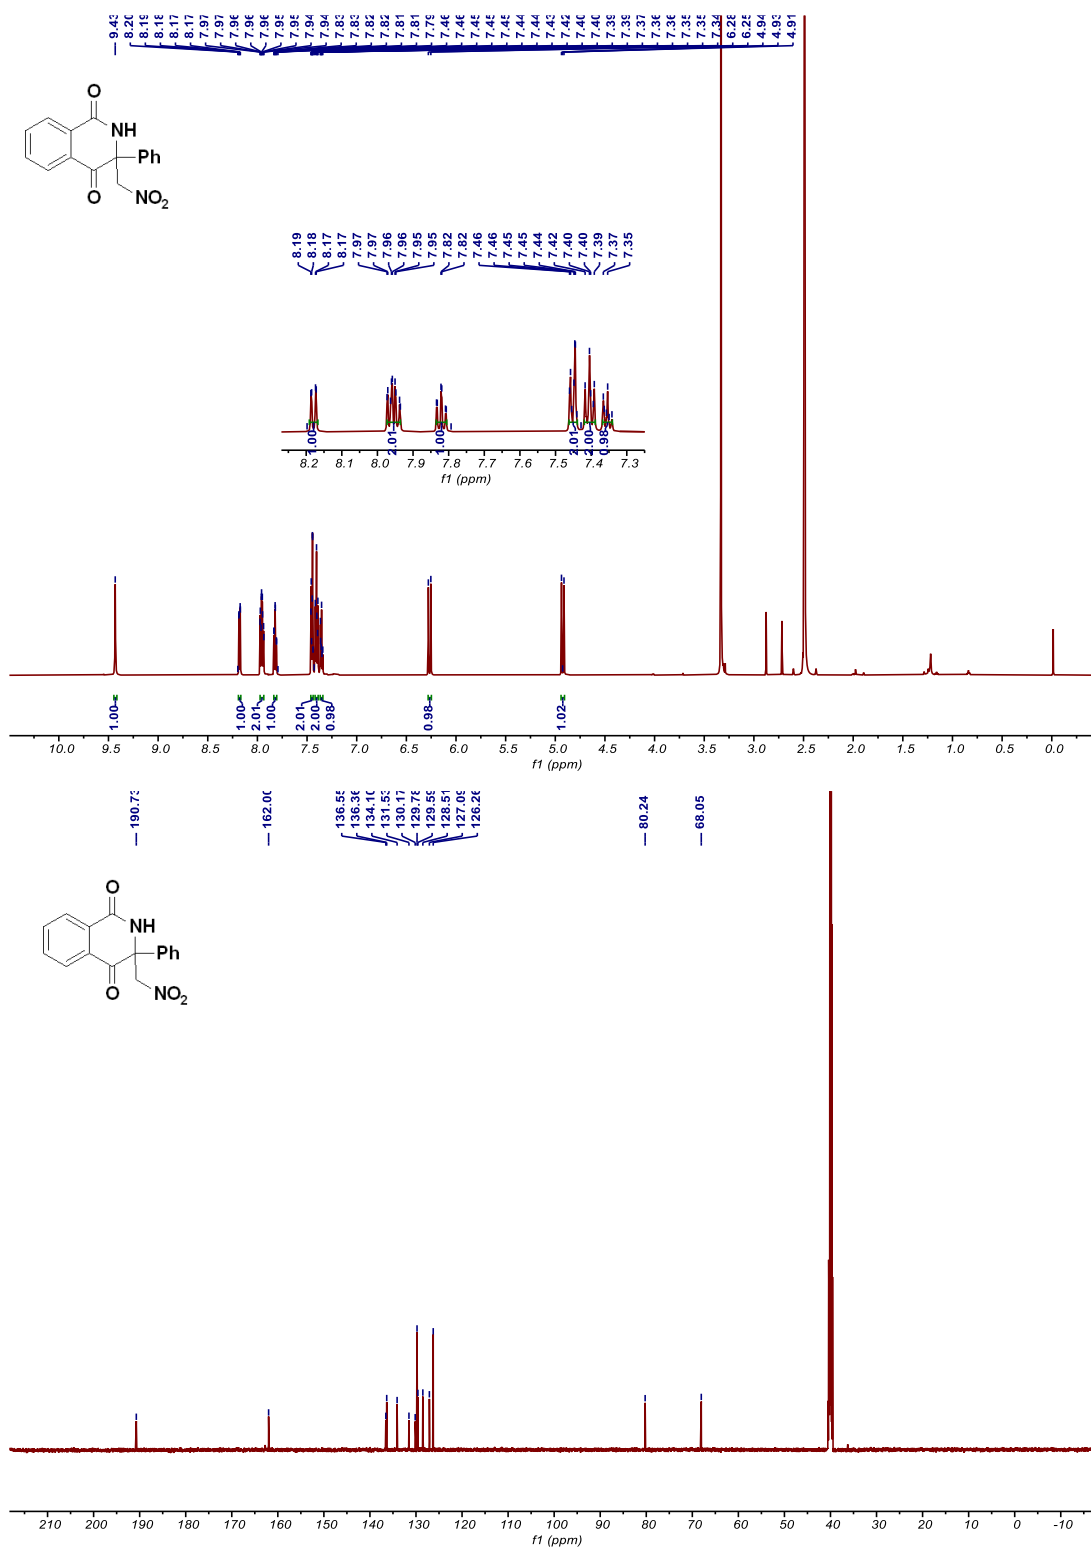

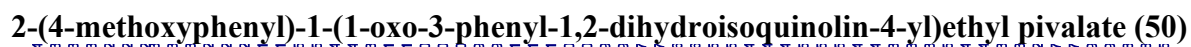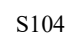

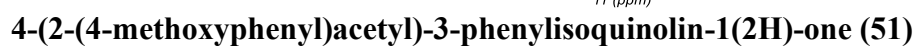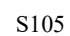



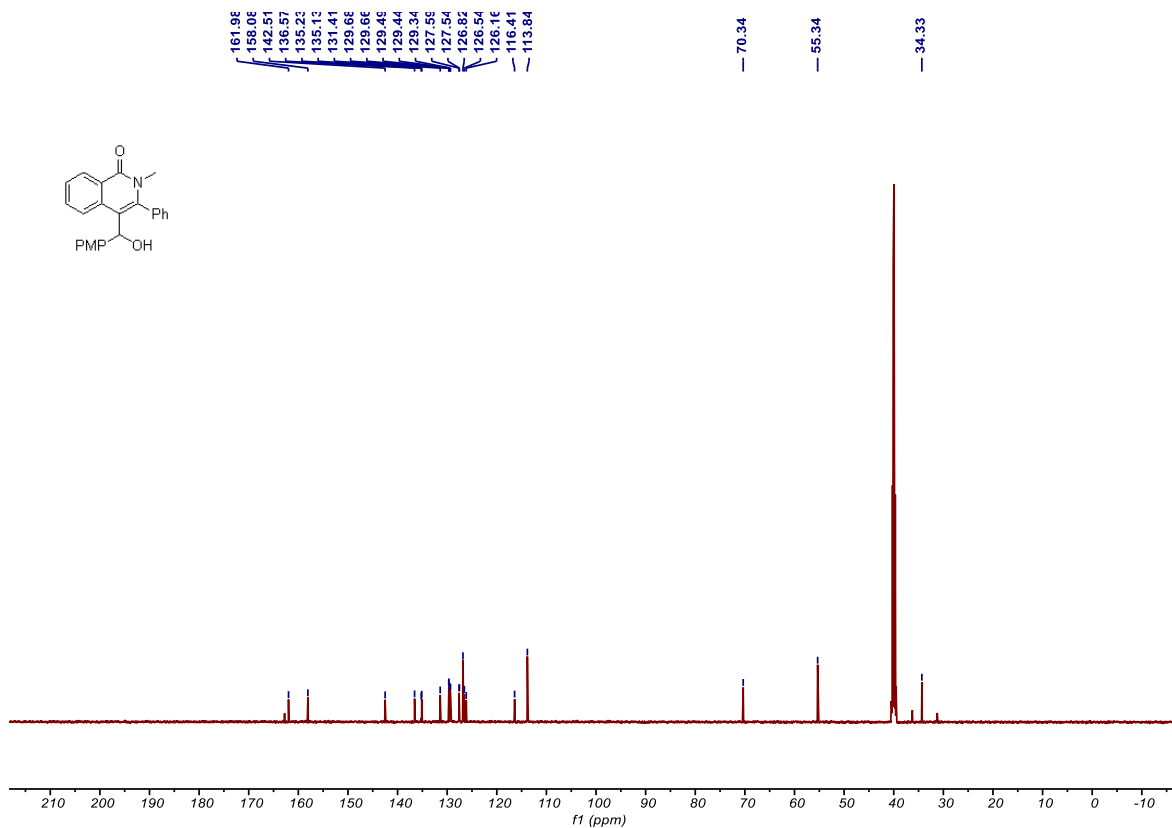

# **4-(2-(4-methoxyphenyl)acetyl)-2-methyl-3-phenylisoquinolin-1(2H)-one (57)**

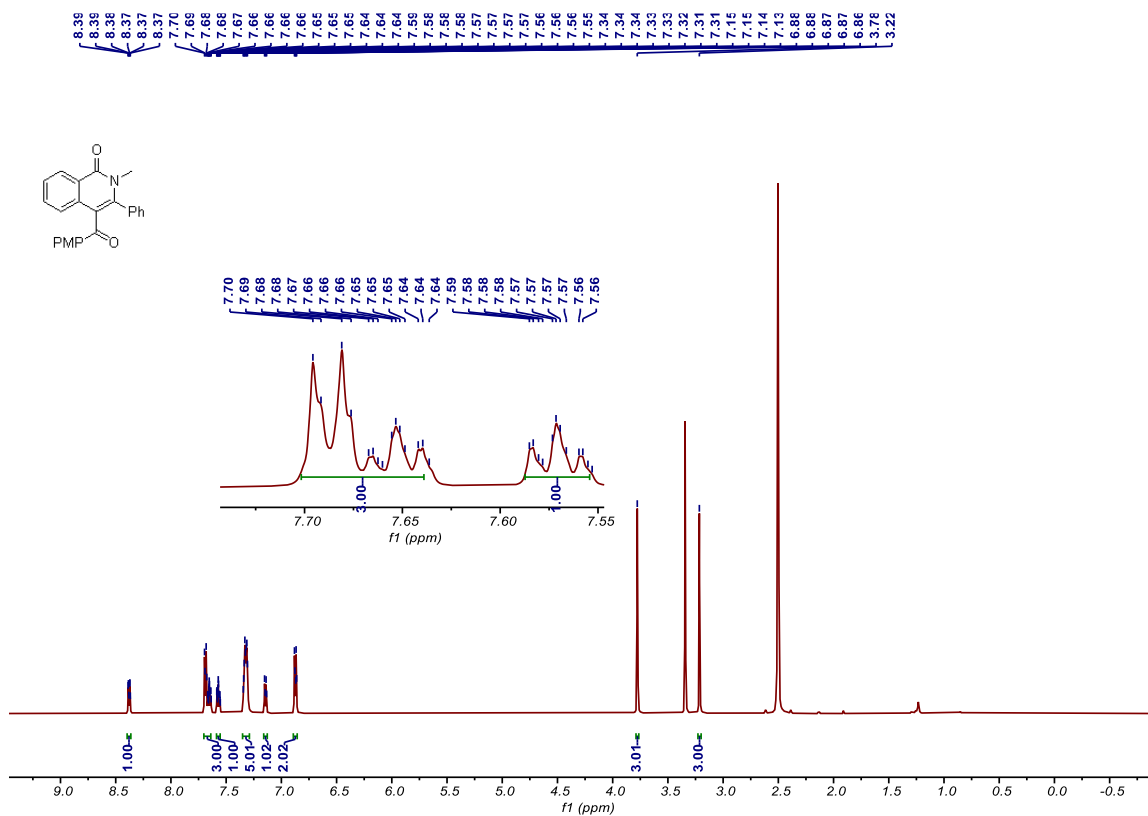

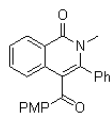



RS15 #1565 RT: 8.82 AV: 1 NL: 8.97E3  
T: FTMS + p ESI Full ms [100.0000-1500.0000]

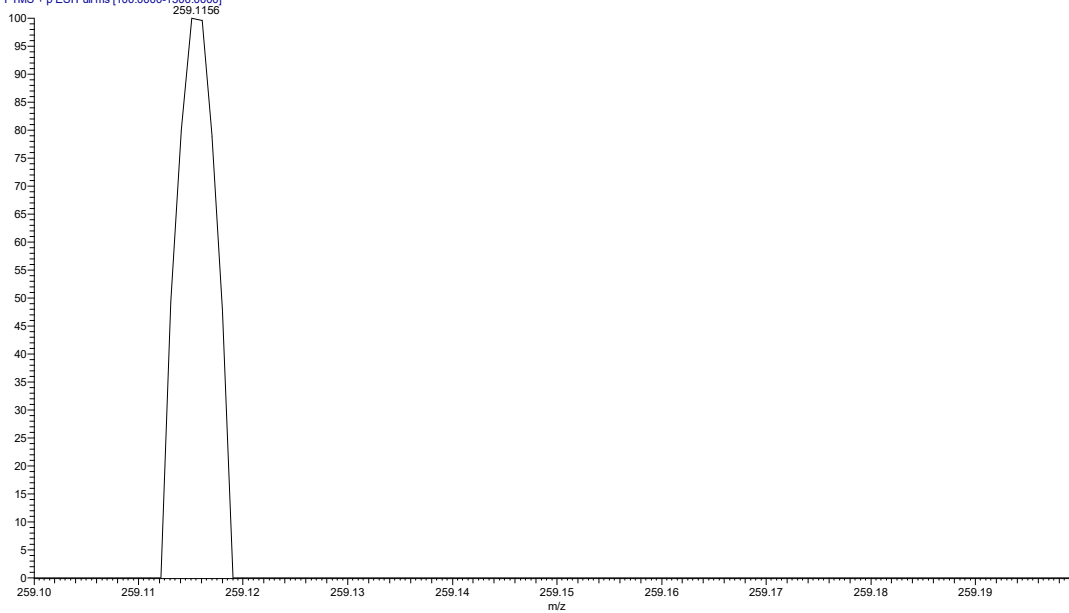

Supplement: d5cc03799a1.pdf [file d5cc03799a1.pdf]
